# Supplementary material for: On the mechanism of the formation of alkyl-Ni(i) catalysts
Source: Royal Society of Chemistry journal article supplement (doi:10.1039/d1cc00203a), 2021-01-01
Supplement: d1cc00203a1.pdf [file d1cc00203a1.pdf]

## SUPPORTING INFORMATION

### On the mechanism of the formation of alkyl-Ni(I) catalysts

M. Teresa Quirós, Daniel Collado-Sanz, Elena Buñuel, Diego J. Cárdenas

*Departamento de Química Orgánica, Facultad de Ciencias, Universidad Autónoma de Madrid,  
Institute for Advanced Research in Chemical Science, IAdChem  
Av. Francisco Tomás y Valiente 7, Campus de Cantoblanco, 28049-Madrid, Spain*

|                                                                                                     |            |
|-----------------------------------------------------------------------------------------------------|------------|
| <b>I. Computational results</b>                                                                     | <b>S2</b>  |
| <b>I.1. Computational methods</b>                                                                   | <b>S2</b>  |
| <b>I.2. Atomic coordinates and energies for the stationary points in gas phase</b>                  | <b>S3</b>  |
| <b>I.3. Atomic coordinates and energies for the stationary points in THF</b>                        | <b>S32</b> |
| <b>I.4. Atomic coordinates and energies for the stationary points in diisopropylether</b>           | <b>S61</b> |
| <b>I.5. Energy comparison for key stationary points in solvent using M06-2X and M06 functionals</b> | <b>S87</b> |

## I. Computational results

### I.1. Computational methods

Calculations were performed with Gaussian 09 at DFT level.<sup>1</sup> The geometries of all complexes here reported were optimized using the M06-2X hybrid functional<sup>2</sup> that accounts for dispersive interactions. Optimizations were carried out using the standard 6-31G(d) basis set for C, H, N, F and O. The LANL2DZ basis set, which includes the relativistic effective core potential (ECP) of Hay and Wadt and employs a split-valence (double- $\zeta$ ) basis set, was used for Ni.<sup>3</sup> Harmonic frequencies were calculated at the same level to characterize the stationary points and to determine the zero-point energies (ZPE). Gibbs free energy has been used throughout the schemes. The starting approximate geometries for the transition states (TS) were graphically located. Intrinsic reaction coordinate (IRC) studies were performed to confirm the relation of the transition states with the corresponding minima. Solvent effects were considered by performing optimizations in THF or diisopropylether using the polarized continuum model (PCM). Gibbs free energies were also calculated by single points calculations using the M06 functional to assess the reliability of the results.

This ESI includes computational results in gas phase (which are not included in the main manuscript), along with the results in THF and diisopropylether for the different processes studied.

---

<sup>1</sup> Gaussian 09, Revision E.01, M. J. Frisch, G. W. Trucks, H. B. Schlegel, G. E. Scuseria, M. A. Robb, J. R. Cheeseman, G. Scalmani, V. Barone, B. Mennucci, G. A. Petersson, H. Nakatsuji, M. Caricato, X. Li, H. P. Hratchian, A. F. Izmaylov, J. Bloino, G. Zheng, J. L. Sonnenberg, M. Hada, M. Ehara, K. Toyota, R. Fukuda, J. Hasegawa, M. Ishida, T. Nakajima, Y. Honda, O. Kitao, H. Nakai, T. Vreven, J. A. Montgomery, Jr., J. E. Peralta, F. Ogliaro, M. Bearpark, J. J. Heyd, E. Brothers, K. N. Kudin, V. N. Staroverov, T. Keith, R. Kobayashi, J. Normand, K. Raghavachari, A. Rendell, J. C. Burant, S. S. Iyengar, J. Tomasi, M. Cossi, N. Rega, J. M. Millam, M. Klene, J. E. Knox, J. B. Cross, V. Bakken, C. Adamo, J. Jaramillo, R. Gomperts, R. E. Stratmann, O. Yazyev, A. J. Austin, R. Cammi, C. Pomelli, J. W. Ochterski, R. L. Martin, K. Morokuma, V. G. Zakrzewski, G. A. Voth, P. Salvador, J. J. Dannenberg, S. Dapprich, A. D. Daniels, O. Farkas, J. B. Foresman, J. V. Ortiz, J. Cioslowski, and D. J. Fox, Gaussian, Inc., Wallingford CT, 2013.

<sup>2</sup> Y. Zhao, D.G. Truhlar, *Theor Chem Account.* **2006**, *120*: 215–241.

<sup>3</sup> (a) A. D. Becke, *J. Chem. Phys.* **1993**, *98*, 5648- 5653. (b) A. D. Becke, *Phys. Rev. A* **1988**, *38*, 3098-3100. (c) C. Lee, W. Yang, R. G. Parr, *Phys. Rev. B* **1988**, *37*, 785-789.

## 1.2. Atomic coordinates and energies for the stationary points in gas phase

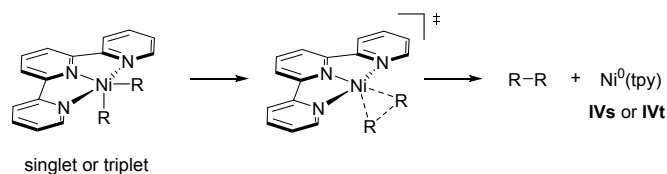

|              | <b>I-bic</b><br>R = CH <sub>3</sub><br>singlet | <b>It</b><br>R = CH <sub>3</sub><br>triplet | <b>IIs</b><br>R = ,<br>singlet | <b>IIIt</b><br>R = ,<br>triplet | <b>IIIs</b><br>R = CF <sub>3</sub><br>singlet | <b>IIIt</b><br>R = CF <sub>3</sub><br>triplet |
|--------------|------------------------------------------------|---------------------------------------------|--------------------------------|---------------------------------|-----------------------------------------------|-----------------------------------------------|
| $\Delta G_a$ | 33.4                                           | 9.0                                         | 44.3                           | 17.0                            | -                                             | 46.7                                          |
| $\Delta G$   | -13.8                                          | -39.1                                       | 19.0                           | -6.3                            | 15.9                                          | -11.4                                         |

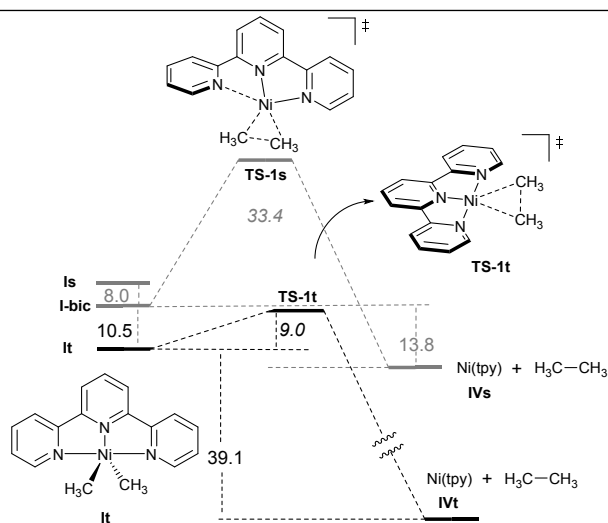

**Is**

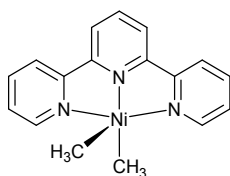

| Center Number | Atomic Number | Atomic Type | Coordinates (Angstroms) |           |           |
|---------------|---------------|-------------|-------------------------|-----------|-----------|
|               |               |             | X                       | Y         | Z         |
| 1             | 1             | 0           | 0.479452                | -0.569301 | 5.669101  |
| 2             | 6             | 0           | 0.188427                | -0.208002 | 4.687948  |
| 3             | 7             | 0           | -0.562534               | 0.696119  | 2.164066  |
| 4             | 6             | 0           | 1.070158                | -0.298314 | 3.616859  |
| 5             | 6             | 0           | -1.074383               | 0.334310  | 4.475740  |
| 6             | 6             | 0           | -1.404243               | 0.766546  | 3.193340  |
| 7             | 6             | 0           | 0.654096                | 0.167428  | 2.370011  |
| 8             | 1             | 0           | 2.049190                | -0.749403 | 3.739110  |
| 9             | 1             | 0           | -1.796012               | 0.416773  | 5.280801  |
| 10            | 1             | 0           | -2.384661               | 1.179934  | 2.971637  |
| 11            | 6             | 0           | 1.512671                | 0.090912  | 1.160598  |
| 12            | 6             | 0           | 2.907183                | 0.087225  | -1.201109 |
| 13            | 6             | 0           | 2.907183                | 0.087225  | 1.201109  |
| 14            | 7             | 0           | 0.848242                | 0.060984  | -0.000000 |

|    |    |   |           |           |           |
|----|----|---|-----------|-----------|-----------|
| 15 | 6  | 0 | 1.512671  | 0.090912  | -1.160598 |
| 16 | 6  | 0 | 3.607085  | 0.072172  | -0.000000 |
| 17 | 1  | 0 | 3.430198  | 0.130516  | 2.149938  |
| 18 | 1  | 0 | 4.692247  | 0.083529  | -0.000000 |
| 19 | 1  | 0 | 3.430198  | 0.130516  | -2.149938 |
| 20 | 6  | 0 | 0.654096  | 0.167428  | -2.370011 |
| 21 | 6  | 0 | -1.074383 | 0.334310  | -4.475740 |
| 22 | 6  | 0 | 1.070158  | -0.298314 | -3.616859 |
| 23 | 7  | 0 | -0.562534 | 0.696119  | -2.164066 |
| 24 | 6  | 0 | -1.404243 | 0.766546  | -3.193340 |
| 25 | 6  | 0 | 0.188427  | -0.208002 | -4.687948 |
| 26 | 1  | 0 | 2.049190  | -0.749403 | -3.739110 |
| 27 | 1  | 0 | -2.384661 | 1.179934  | -2.971637 |
| 28 | 1  | 0 | 0.479452  | -0.569301 | -5.669101 |
| 29 | 1  | 0 | -1.796012 | 0.416773  | -5.280801 |
| 30 | 28 | 0 | -1.207062 | -0.101563 | 0.000000  |
| 31 | 6  | 0 | -3.126436 | -0.039233 | 0.000000  |
| 32 | 1  | 0 | -3.577026 | -0.503640 | -0.886436 |
| 33 | 1  | 0 | -3.401027 | 1.033398  | 0.000000  |
| 34 | 1  | 0 | -3.577026 | -0.503640 | 0.886436  |
| 35 | 6  | 0 | -1.228298 | -2.064436 | 0.000000  |
| 36 | 1  | 0 | -0.208956 | -2.479363 | 0.000000  |
| 37 | 1  | 0 | -1.755021 | -2.434189 | -0.887223 |
| 38 | 1  | 0 | -1.755021 | -2.434189 | 0.887223  |

-----

Zero-point correction= 0.302388  
(Hartree/Particle)  
Thermal correction to Energy= 0.320815  
Thermal correction to Enthalpy= 0.321759  
Thermal correction to Gibbs Free Energy= 0.255436  
Sum of electronic and zero-point Energies= -990.901367  
Sum of electronic and thermal Energies= -990.882941  
Sum of electronic and thermal Enthalpies= -990.881996  
Sum of electronic and thermal Free Energies= -990.948320

### I-bic

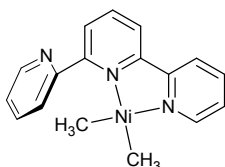

-----

| Center Number | Atomic Number | Atomic Type | Coordinates (Angstroms) |           |           |
|---------------|---------------|-------------|-------------------------|-----------|-----------|
|               |               |             | X                       | Y         | Z         |
| 1             | 1             | 0           | -5.625156               | 0.146898  | 0.718336  |
| 2             | 6             | 0           | -4.693274               | 0.023189  | 0.175708  |
| 3             | 7             | 0           | -2.284454               | -0.312347 | -1.198467 |
| 4             | 6             | 0           | -3.595617               | 0.824203  | 0.466723  |
| 5             | 6             | 0           | -4.567380               | -0.947889 | -0.810327 |
| 6             | 6             | 0           | -3.344589               | -1.069389 | -1.468859 |
| 7             | 6             | 0           | -2.411728               | 0.606967  | -0.238294 |
| 8             | 1             | 0           | -3.638677               | 1.573296  | 1.251200  |
| 9             | 1             | 0           | -5.394235               | -1.600734 | -1.067274 |
| 10            | 1             | 0           | -3.209451               | -1.813406 | -2.249581 |
| 11            | 6             | 0           | -1.197186               | 1.426590  | 0.023547  |
| 12            | 6             | 0           | 1.108229                | 2.897387  | 0.208654  |
| 13            | 6             | 0           | -1.284698               | 2.812468  | 0.168724  |
| 14            | 7             | 0           | -0.018521               | 0.794039  | 0.032279  |
| 15            | 6             | 0           | 1.115749                | 1.509506  | 0.066328  |

|    |    |   |           |           |           |
|----|----|---|-----------|-----------|-----------|
| 16 | 6  | 0 | -0.114948 | 3.550479  | 0.286812  |
| 17 | 1  | 0 | -2.255641 | 3.295383  | 0.151314  |
| 18 | 1  | 0 | -0.152903 | 4.629043  | 0.401006  |
| 19 | 1  | 0 | 2.031887  | 3.461293  | 0.250790  |
| 20 | 6  | 0 | 2.361893  | 0.714675  | -0.112647 |
| 21 | 6  | 0 | 4.532342  | -0.897429 | -0.551860 |
| 22 | 6  | 0 | 3.633063  | 1.285765  | -0.150562 |
| 23 | 7  | 0 | 2.176042  | -0.607374 | -0.274904 |
| 24 | 6  | 0 | 3.233299  | -1.391479 | -0.482901 |
| 25 | 6  | 0 | 4.732365  | 0.465952  | -0.376046 |
| 26 | 1  | 0 | 3.770194  | 2.351102  | -0.009742 |
| 27 | 1  | 0 | 3.017542  | -2.450242 | -0.582204 |
| 28 | 1  | 0 | 5.730651  | 0.890064  | -0.413837 |
| 29 | 1  | 0 | 5.360087  | -1.573647 | -0.732027 |
| 30 | 28 | 0 | 0.305899  | -1.252528 | 0.365763  |
| 31 | 6  | 0 | 0.796872  | -3.124306 | 0.486896  |
| 32 | 1  | 0 | 1.603567  | -3.268706 | 1.222223  |
| 33 | 1  | 0 | 1.169630  | -3.455015 | -0.498462 |
| 34 | 1  | 0 | -0.029780 | -3.784085 | 0.764653  |
| 35 | 6  | 0 | -1.217912 | -1.595552 | 1.529455  |
| 36 | 1  | 0 | -1.613036 | -0.659292 | 1.956071  |
| 37 | 1  | 0 | -0.924714 | -2.242664 | 2.363680  |
| 38 | 1  | 0 | -2.035473 | -2.095588 | 0.992032  |

-----

Zero-point correction= 0.304809  
(Hartree/Particle)  
Thermal correction to Energy= 0.323776  
Thermal correction to Enthalpy= 0.324721  
Thermal correction to Gibbs Free Energy= 0.257679  
Sum of electronic and zero-point Energies= -990.913971  
Sum of electronic and thermal Energies= -990.895003  
Sum of electronic and thermal Enthalpies= -990.894058  
Sum of electronic and thermal Free Energies= -990.961100

It

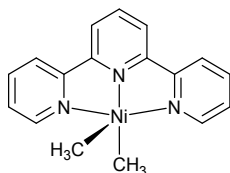

-----

| Center Number | Atomic Number | Atomic Type | Coordinates (Angstroms) |           |           |
|---------------|---------------|-------------|-------------------------|-----------|-----------|
|               |               |             | X                       | Y         | Z         |
| 1             | 1             | 0           | 5.762861                | 0.580729  | -0.292311 |
| 2             | 6             | 0           | 4.738717                | 0.222466  | -0.265017 |
| 3             | 7             | 0           | 2.122957                | -0.680219 | -0.205356 |
| 4             | 6             | 0           | 3.684525                | 1.127395  | -0.221155 |
| 5             | 6             | 0           | 4.464051                | -1.140823 | -0.274874 |
| 6             | 6             | 0           | 3.132450                | -1.545166 | -0.245360 |
| 7             | 6             | 0           | 2.378755                | 0.636557  | -0.187538 |
| 8             | 1             | 0           | 3.880737                | 2.193333  | -0.218116 |
| 9             | 1             | 0           | 5.258549                | -1.877647 | -0.307579 |
| 10            | 1             | 0           | 2.845402                | -2.592956 | -0.253225 |
| 11            | 6             | 0           | 1.177398                | 1.515061  | -0.122658 |
| 12            | 6             | 0           | -1.179658               | 2.918807  | 0.031676  |
| 13            | 6             | 0           | 1.226342                | 2.902748  | 0.018927  |
| 14            | 7             | 0           | 0.009504                | 0.871360  | -0.188025 |
| 15            | 6             | 0           | -1.149329               | 1.531211  | -0.111548 |
| 16            | 6             | 0           | 0.028394                | 3.604336  | 0.093252  |

-----

|    |    |   |           |           |           |
|----|----|---|-----------|-----------|-----------|
| 17 | 1  | 0 | 2.171399  | 3.428620  | 0.083944  |
| 18 | 1  | 0 | 0.036365  | 4.683075  | 0.209804  |
| 19 | 1  | 0 | -2.117987 | 3.455348  | 0.107793  |
| 20 | 6  | 0 | -2.362467 | 0.668771  | -0.170323 |
| 21 | 6  | 0 | -4.462547 | -1.091430 | -0.265919 |
| 22 | 6  | 0 | -3.662753 | 1.171649  | -0.226239 |
| 23 | 7  | 0 | -2.120880 | -0.649956 | -0.167791 |
| 24 | 6  | 0 | -3.135531 | -1.508501 | -0.214207 |
| 25 | 6  | 0 | -4.724042 | 0.274792  | -0.273138 |
| 26 | 1  | 0 | -3.848855 | 2.239373  | -0.241487 |
| 27 | 1  | 0 | -2.854252 | -2.558414 | -0.211706 |
| 28 | 1  | 0 | -5.744496 | 0.641701  | -0.318657 |
| 29 | 1  | 0 | -5.263871 | -1.820546 | -0.303414 |
| 30 | 28 | 0 | -0.010662 | -1.269164 | 0.148096  |
| 31 | 6  | 0 | 0.043178  | -0.805289 | 2.171240  |
| 32 | 1  | 0 | -0.848476 | -0.239914 | 2.482511  |
| 33 | 1  | 0 | 0.924557  | -0.201847 | 2.437161  |
| 34 | 1  | 0 | 0.077609  | -1.727237 | 2.764747  |
| 35 | 6  | 0 | -0.124683 | -3.237640 | -0.471445 |
| 36 | 1  | 0 | -0.590993 | -3.349213 | -1.463394 |
| 37 | 1  | 0 | -0.745151 | -3.808002 | 0.236192  |
| 38 | 1  | 0 | 0.837260  | -3.767775 | -0.524783 |

-----

Zero-point correction= 0.301958  
(Hartree/Particle)  
Thermal correction to Energy= 0.322138  
Thermal correction to Enthalpy= 0.323082  
Thermal correction to Gibbs Free Energy= 0.251593  
Sum of electronic and zero-point Energies= -990.927518  
Sum of electronic and thermal Energies= -990.907338  
Sum of electronic and thermal Enthalpies= -990.906394  
Sum of electronic and thermal Free Energies= -990.977883

### TS-1s

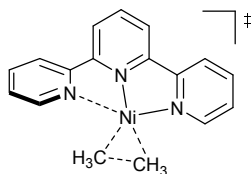

Imaginary frequency = -565.5764 cm<sup>-1</sup>

-----

| Center Number | Atomic Number | Atomic Type | Coordinates (Angstroms) |           |           |
|---------------|---------------|-------------|-------------------------|-----------|-----------|
|               |               |             | X                       | Y         | Z         |
| 1             | 1             | 0           | -5.670577               | 0.503666  | 0.340697  |
| 2             | 6             | 0           | -4.646735               | 0.220424  | 0.119697  |
| 3             | 7             | 0           | -2.002590               | -0.530755 | -0.428943 |
| 4             | 6             | 0           | -3.620110               | 1.134453  | 0.250411  |
| 5             | 6             | 0           | -4.337338               | -1.087798 | -0.286226 |
| 6             | 6             | 0           | -3.018034               | -1.409635 | -0.533974 |
| 7             | 6             | 0           | -2.304611               | 0.741542  | -0.037959 |
| 8             | 1             | 0           | -3.814232               | 2.145179  | 0.594902  |
| 9             | 1             | 0           | -5.111584               | -1.835733 | -0.415152 |
| 10            | 1             | 0           | -2.736405               | -2.411414 | -0.850000 |
| 11            | 6             | 0           | -1.143917               | 1.614045  | 0.060251  |
| 12            | 6             | 0           | 1.252763                | 2.966599  | -0.048049 |
| 13            | 6             | 0           | -1.154043               | 2.998123  | -0.068193 |
| 14            | 7             | 0           | 0.020742                | 0.926054  | 0.221950  |

|    |    |   |           |           |           |
|----|----|---|-----------|-----------|-----------|
| 15 | 6  | 0 | 1.204571  | 1.583682  | 0.080808  |
| 16 | 6  | 0 | 0.058602  | 3.688217  | -0.094187 |
| 17 | 1  | 0 | -2.094050 | 3.527158  | -0.189067 |
| 18 | 1  | 0 | 0.073850  | 4.765394  | -0.217615 |
| 19 | 1  | 0 | 2.207465  | 3.471891  | -0.154011 |
| 20 | 6  | 0 | 2.345115  | 0.682773  | -0.003183 |
| 21 | 6  | 0 | 4.349537  | -1.174415 | -0.270449 |
| 22 | 6  | 0 | 3.668818  | 1.056252  | 0.272972  |
| 23 | 7  | 0 | 2.019095  | -0.588938 | -0.378285 |
| 24 | 6  | 0 | 3.022734  | -1.478457 | -0.500544 |
| 25 | 6  | 0 | 4.681130  | 0.127681  | 0.135306  |
| 26 | 1  | 0 | 3.881023  | 2.066107  | 0.608923  |
| 27 | 1  | 0 | 2.727775  | -2.474709 | -0.818642 |
| 28 | 1  | 0 | 5.710964  | 0.397088  | 0.345590  |
| 29 | 1  | 0 | 5.111530  | -1.932738 | -0.410536 |
| 30 | 28 | 0 | 0.002167  | -1.014580 | -0.047408 |
| 31 | 6  | 0 | -0.041222 | -2.994836 | -0.277307 |
| 32 | 1  | 0 | 0.906943  | -3.517338 | -0.153163 |
| 33 | 1  | 0 | -0.132733 | -2.677493 | -1.336550 |
| 34 | 1  | 0 | -0.858222 | -3.689902 | -0.079197 |
| 35 | 6  | 0 | -0.252135 | -2.274936 | 1.589466  |
| 36 | 1  | 0 | 0.256745  | -1.471868 | 2.132785  |
| 37 | 1  | 0 | 0.155782  | -3.227126 | 1.921563  |
| 38 | 1  | 0 | -1.326439 | -2.236733 | 1.770805  |

-----  
 Zero-point correction=  
 (Hartree/Particle)

0.303933

Thermal correction to Energy=

0.322372

Thermal correction to Enthalpy=

0.323316

Thermal correction to Gibbs Free Energy=

0.257649

Sum of electronic and zero-point Energies=

-990.861637

Sum of electronic and thermal Energies=

-990.843198

Sum of electronic and thermal Enthalpies=

-990.842254

Sum of electronic and thermal Free Energies=

-990.907921

### TS-1t

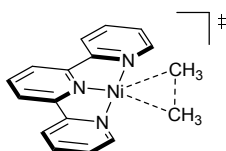

Imaginary frequency = -227.0953 cm<sup>-1</sup>

| Center Number | Atomic Number | Atomic Type | Coordinates (Angstroms) |           |           |
|---------------|---------------|-------------|-------------------------|-----------|-----------|
|               |               |             | X                       | Y         | Z         |
| 1             | 1             | 0           | -5.767550               | 0.712561  | -0.005203 |
| 2             | 6             | 0           | -4.746550               | 0.343883  | -0.004131 |
| 3             | 7             | 0           | -2.129546               | -0.598380 | -0.005160 |
| 4             | 6             | 0           | -3.690806               | 1.230065  | -0.011567 |
| 5             | 6             | 0           | -4.487711               | -1.037305 | 0.006903  |
| 6             | 6             | 0           | -3.166297               | -1.443260 | 0.005775  |
| 7             | 6             | 0           | -2.368586               | 0.741386  | -0.009467 |
| 8             | 1             | 0           | -3.876932               | 2.298068  | -0.017566 |
| 9             | 1             | 0           | -5.289179               | -1.766483 | 0.016238  |
| 10            | 1             | 0           | -2.905399               | -2.499947 | 0.016107  |
| 11            | 6             | 0           | -1.182873               | 1.584152  | -0.006524 |
| 12            | 6             | 0           | 1.210942                | 2.969497  | 0.008370  |
| 13            | 6             | 0           | -1.199286               | 2.977477  | -0.007165 |

|    |    |   |           |           |           |
|----|----|---|-----------|-----------|-----------|
| 14 | 7  | 0 | 0.003269  | 0.899568  | 0.000517  |
| 15 | 6  | 0 | 1.179491  | 1.586438  | 0.007442  |
| 16 | 6  | 0 | 0.000450  | 3.681405  | 0.000694  |
| 17 | 1  | 0 | -2.140260 | 3.517003  | -0.013226 |
| 18 | 1  | 0 | 0.002277  | 4.765359  | 0.000790  |
| 19 | 1  | 0 | 2.152743  | 3.506461  | 0.014277  |
| 20 | 6  | 0 | 2.376668  | 0.734108  | 0.009232  |
| 21 | 6  | 0 | 4.492473  | -1.038379 | -0.009392 |
| 22 | 6  | 0 | 3.692011  | 1.225677  | 0.010238  |
| 23 | 7  | 0 | 2.136991  | -0.598224 | 0.004454  |
| 24 | 6  | 0 | 3.169553  | -1.446287 | -0.007487 |
| 25 | 6  | 0 | 4.751286  | 0.337730  | 0.001786  |
| 26 | 1  | 0 | 3.876527  | 2.293595  | 0.016135  |
| 27 | 1  | 0 | 2.906967  | -2.502148 | -0.017931 |
| 28 | 1  | 0 | 5.772053  | 0.706803  | 0.002088  |
| 29 | 1  | 0 | 5.294008  | -1.767744 | -0.019554 |
| 30 | 28 | 0 | -0.009045 | -1.114489 | 0.000740  |
| 31 | 6  | 0 | 0.020198  | -2.750596 | -1.128872 |
| 32 | 1  | 0 | 0.753428  | -3.546724 | -1.011054 |
| 33 | 1  | 0 | 0.297593  | -2.116390 | -1.984120 |
| 34 | 1  | 0 | -0.977130 | -3.163348 | -1.277149 |
| 35 | 6  | 0 | -0.023929 | -2.750259 | 1.131157  |
| 36 | 1  | 0 | -0.298977 | -2.116555 | 1.987341  |
| 37 | 1  | 0 | 0.973702  | -3.164029 | 1.276021  |
| 38 | 1  | 0 | -0.757814 | -3.545931 | 1.015452  |

-----

Zero-point correction= 0.301152  
(Hartree/Particle)  
Thermal correction to Energy= 0.320276  
Thermal correction to Enthalpy= 0.321220  
Thermal correction to Gibbs Free Energy= 0.253070  
Sum of electronic and zero-point Energies= -990.915516  
Sum of electronic and thermal Energies= -990.896392  
Sum of electronic and thermal Enthalpies= -990.895448  
Sum of electronic and thermal Free Energies= -990.963598

**II5**

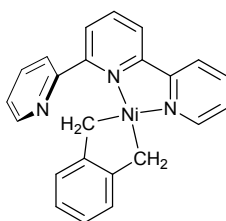

-----

| Center Number | Atomic Number | Atomic Type | Coordinates (Angstroms) |           |           |
|---------------|---------------|-------------|-------------------------|-----------|-----------|
|               |               |             | X                       | Y         | Z         |
| 1             | 28            | 0           | -0.074838               | 0.655908  | -0.253899 |
| 2             | 7             | 0           | -1.333120               | -0.993531 | 0.164564  |
| 3             | 6             | 0           | -2.931329               | -2.619852 | 1.747913  |
| 4             | 6             | 0           | -0.962471               | -2.252168 | 0.427002  |
| 5             | 6             | 0           | -2.531467               | -0.563061 | 0.592715  |
| 6             | 6             | 0           | -3.356096               | -1.343499 | 1.401757  |
| 7             | 6             | 0           | -1.731729               | -3.092951 | 1.234893  |
| 8             | 1             | 0           | -4.302153               | -0.961812 | 1.765959  |
| 9             | 1             | 0           | -1.397905               | -4.107397 | 1.423786  |
| 10            | 1             | 0           | -3.545776               | -3.248036 | 2.384600  |
| 11            | 7             | 0           | 0.355471                | -2.470735 | -1.550088 |
| 12            | 6             | 0           | 2.340173                | -3.940138 | -0.242062 |
| 13            | 6             | 0           | 1.434323                | -2.903231 | -2.197395 |



|    |   |   |           |           |           |
|----|---|---|-----------|-----------|-----------|
| 14 | 6 | 0 | 0.261483  | -2.759714 | -0.249574 |
| 15 | 6 | 0 | 1.214512  | -3.502740 | 0.446083  |
| 16 | 6 | 0 | 2.457445  | -3.632335 | -1.592005 |
| 17 | 1 | 0 | 1.487486  | -2.650967 | -3.253526 |
| 18 | 1 | 0 | 1.093942  | -3.692194 | 1.508033  |
| 19 | 1 | 0 | 3.321372  | -3.943196 | -2.168908 |
| 20 | 1 | 0 | 3.117768  | -4.497111 | 0.270758  |
| 21 | 7 | 0 | -1.938440 | 1.472555  | -0.504200 |
| 22 | 6 | 0 | -4.491650 | 2.538178  | -0.353266 |
| 23 | 6 | 0 | -2.920950 | 0.786302  | 0.102043  |
| 24 | 6 | 0 | -2.205739 | 2.664991  | -1.036260 |
| 25 | 6 | 0 | -3.473224 | 3.236361  | -0.990638 |
| 26 | 6 | 0 | -4.215458 | 1.293963  | 0.201240  |
| 27 | 1 | 0 | -1.365726 | 3.171105  | -1.500363 |
| 28 | 1 | 0 | -3.647052 | 4.205852  | -1.442740 |
| 29 | 1 | 0 | -5.000772 | 0.724849  | 0.684203  |
| 30 | 1 | 0 | -5.493145 | 2.951709  | -0.292240 |
| 31 | 6 | 0 | 0.856813  | 2.354426  | -0.477421 |
| 32 | 1 | 0 | 0.292905  | 3.162907  | 0.016697  |
| 33 | 1 | 0 | 0.870531  | 2.595124  | -1.555937 |
| 34 | 6 | 0 | 1.657451  | -0.081675 | 0.291209  |
| 35 | 1 | 0 | 1.543641  | -0.674797 | 1.215681  |
| 36 | 1 | 0 | 2.031903  | -0.780627 | -0.472256 |
| 37 | 6 | 0 | 2.667050  | 1.019977  | 0.490675  |
| 38 | 6 | 0 | 4.395611  | 3.207008  | 0.743883  |
| 39 | 6 | 0 | 2.257748  | 2.287941  | 0.070962  |
| 40 | 6 | 0 | 3.943815  | 0.855574  | 1.036695  |
| 41 | 6 | 0 | 4.804898  | 1.942258  | 1.166981  |
| 42 | 6 | 0 | 3.126025  | 3.375523  | 0.196427  |
| 43 | 1 | 0 | 4.260535  | -0.132568 | 1.366768  |
| 44 | 1 | 0 | 5.792676  | 1.807093  | 1.599885  |
| 45 | 1 | 0 | 2.800335  | 4.361936  | -0.129630 |
| 46 | 1 | 0 | 5.064125  | 4.057842  | 0.845332  |

-----

Zero-point correction= 0.367243  
(Hartree/Particle)  
Thermal correction to Energy= 0.389126  
Thermal correction to Enthalpy= 0.390070  
Thermal correction to Gibbs Free Energy= 0.315622  
Sum of electronic and zero-point Energies= -1220.620670  
Sum of electronic and thermal Energies= -1220.598787  
Sum of electronic and thermal Enthalpies= -1220.597843  
Sum of electronic and thermal Free Energies= -1220.672291

**lit**

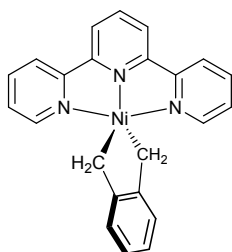

-----

| Center Number | Atomic Number | Atomic Type | Coordinates (Angstroms) |           |           |
|---------------|---------------|-------------|-------------------------|-----------|-----------|
|               |               |             | X                       | Y         | Z         |
| 1             | 28            | 0           | 0.159677                | -0.639380 | -0.385103 |
| 2             | 7             | 0           | 1.284050                | 1.168551  | -0.121338 |
| 3             | 6             | 0           | 2.687041                | 3.451170  | 0.487450  |

-----

|    |   |   |           |           |           |
|----|---|---|-----------|-----------|-----------|
| 4  | 6 | 0 | 0.638253  | 2.336345  | -0.060603 |
| 5  | 6 | 0 | 2.596899  | 1.090003  | 0.118578  |
| 6  | 6 | 0 | 3.341370  | 2.225559  | 0.435668  |
| 7  | 6 | 0 | 1.322313  | 3.517356  | 0.237514  |
| 8  | 1 | 0 | 4.404135  | 2.164942  | 0.636060  |
| 9  | 1 | 0 | 0.807670  | 4.469765  | 0.268753  |
| 10 | 1 | 0 | 3.241297  | 4.353727  | 0.723106  |
| 11 | 7 | 0 | -1.290448 | 1.062202  | -0.693976 |
| 12 | 6 | 0 | -3.035474 | 3.195600  | -0.358634 |
| 13 | 6 | 0 | -2.598663 | 0.907091  | -0.898909 |
| 14 | 6 | 0 | -0.827077 | 2.264968  | -0.315904 |
| 15 | 6 | 0 | -1.670734 | 3.359863  | -0.141105 |
| 16 | 6 | 0 | -3.510365 | 1.949534  | -0.741191 |
| 17 | 1 | 0 | -2.924816 | -0.090483 | -1.177682 |
| 18 | 1 | 0 | -1.283031 | 4.319714  | 0.179374  |
| 19 | 1 | 0 | -4.565865 | 1.764399  | -0.903419 |
| 20 | 1 | 0 | -3.714422 | 4.030750  | -0.218389 |
| 21 | 7 | 0 | 2.289931  | -1.247840 | -0.272799 |
| 22 | 6 | 0 | 4.955224  | -1.879297 | 0.118454  |
| 23 | 6 | 0 | 3.171268  | -0.281348 | 0.023859  |
| 24 | 6 | 0 | 2.705498  | -2.507640 | -0.378999 |
| 25 | 6 | 0 | 4.034645  | -2.874390 | -0.189528 |
| 26 | 6 | 0 | 4.522399  | -0.562687 | 0.226607  |
| 27 | 1 | 0 | 1.934753  | -3.232992 | -0.623156 |
| 28 | 1 | 0 | 4.332884  | -3.912292 | -0.282147 |
| 29 | 1 | 0 | 5.227966  | 0.224866  | 0.463908  |
| 30 | 1 | 0 | 6.001652  | -2.121985 | 0.273298  |
| 31 | 6 | 0 | -0.813758 | -2.417936 | -0.891501 |
| 32 | 1 | 0 | -0.203543 | -3.183437 | -0.384341 |
| 33 | 1 | 0 | -1.015698 | -2.772670 | -1.908517 |
| 34 | 6 | 0 | -0.591372 | -1.064681 | 1.522490  |
| 35 | 1 | 0 | 0.021709  | -1.929888 | 1.809669  |
| 36 | 1 | 0 | -0.589668 | -0.331253 | 2.336474  |
| 37 | 6 | 0 | -1.960534 | -1.452404 | 1.094297  |
| 38 | 6 | 0 | -4.505843 | -2.016320 | 0.020801  |
| 39 | 6 | 0 | -2.074557 | -2.177746 | -0.129893 |
| 40 | 6 | 0 | -3.126385 | -1.008748 | 1.722555  |
| 41 | 6 | 0 | -4.392620 | -1.273663 | 1.191372  |
| 42 | 6 | 0 | -3.349446 | -2.469208 | -0.623110 |
| 43 | 1 | 0 | -3.038717 | -0.425847 | 2.637948  |
| 44 | 1 | 0 | -5.281876 | -0.907391 | 1.697928  |
| 45 | 1 | 0 | -3.434059 | -3.025902 | -1.554894 |
| 46 | 1 | 0 | -5.484534 | -2.240299 | -0.395893 |

```

-----
Zero-point correction=                0.365686
(Hartree/Particle)
Thermal correction to Energy=         0.387660
Thermal correction to Enthalpy=       0.388604
Thermal correction to Gibbs Free Energy= 0.313130
Sum of electronic and zero-point Energies= -1220.636472
Sum of electronic and thermal Energies= -1220.614499
Sum of electronic and thermal Enthalpies= -1220.613555
Sum of electronic and thermal Free Energies= -1220.689029

```

TS-(II-IV)s

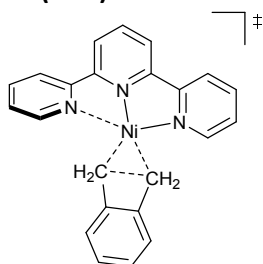

Imaginary frequency =  $-477.4416 \text{ cm}^{-1}$

| Center Number | Atomic Number | Atomic Type | Coordinates (Angstroms) |           |           |
|---------------|---------------|-------------|-------------------------|-----------|-----------|
|               |               |             | X                       | Y         | Z         |
| 1             | 28            | 0           | -0.165287               | -0.183613 | -0.233699 |
| 2             | 7             | 0           | -1.771240               | 0.692223  | 0.300413  |
| 3             | 6             | 0           | -4.226011               | 2.019281  | 0.168967  |
| 4             | 6             | 0           | -2.943270               | -0.018461 | 0.183447  |
| 5             | 6             | 0           | -1.819688               | 2.061329  | 0.169919  |
| 6             | 6             | 0           | -3.027290               | 2.740278  | 0.143356  |
| 7             | 6             | 0           | -4.173920               | 0.625059  | 0.154210  |
| 8             | 1             | 0           | -3.037432               | 3.822531  | 0.057901  |
| 9             | 1             | 0           | -5.086526               | 0.042134  | 0.076088  |
| 10            | 1             | 0           | -5.178315               | 2.534766  | 0.121745  |
| 11            | 7             | 0           | -1.454813               | -1.764297 | -0.381514 |
| 12            | 6             | 0           | -3.366697               | -3.752320 | 0.172484  |
| 13            | 6             | 0           | -1.163674               | -3.079525 | -0.485212 |
| 14            | 6             | 0           | -2.721741               | -1.434303 | 0.036332  |
| 15            | 6             | 0           | -3.683087               | -2.422196 | 0.321597  |
| 16            | 6             | 0           | -2.063428               | -4.092059 | -0.240940 |
| 17            | 1             | 0           | -0.150833               | -3.317005 | -0.797607 |
| 18            | 1             | 0           | -4.660367               | -2.118544 | 0.682228  |
| 19            | 1             | 0           | -1.764524               | -5.125004 | -0.376889 |
| 20            | 1             | 0           | -4.098575               | -4.523864 | 0.387585  |
| 21            | 7             | 0           | 0.440241                | 1.756904  | -0.424071 |
| 22            | 6             | 0           | 1.106163                | 4.428749  | 0.093740  |
| 23            | 6             | 0           | -0.509685               | 2.647450  | 0.004402  |
| 24            | 6             | 0           | 1.705553                | 2.204711  | -0.565337 |
| 25            | 6             | 0           | 2.081035                | 3.511362  | -0.338589 |
| 26            | 6             | 0           | -0.186708               | 3.987939  | 0.275157  |
| 27            | 1             | 0           | 2.437679                | 1.468232  | -0.887986 |
| 28            | 1             | 0           | 3.109884                | 3.813001  | -0.497469 |
| 29            | 1             | 0           | -0.956886               | 4.655730  | 0.646937  |
| 30            | 1             | 0           | 1.370716                | 5.460754  | 0.299809  |
| 31            | 6             | 0           | 1.586311                | -1.067971 | -1.008995 |
| 32            | 1             | 0           | 1.370952                | -0.312684 | -1.777561 |
| 33            | 1             | 0           | 1.249439                | -2.040153 | -1.375673 |
| 34            | 6             | 0           | 1.401882                | -1.109471 | 0.997628  |
| 35            | 1             | 0           | 1.021307                | -0.330205 | 1.664417  |
| 36            | 1             | 0           | 0.949924                | -2.073454 | 1.244748  |
| 37            | 6             | 0           | 2.890288                | -1.128832 | 0.820910  |
| 38            | 6             | 0           | 5.382758                | -1.119817 | -0.342004 |
| 39            | 6             | 0           | 3.019688                | -1.087048 | -0.553053 |
| 40            | 6             | 0           | 3.994045                | -1.176251 | 1.659442  |
| 41            | 6             | 0           | 5.251945                | -1.168289 | 1.048063  |
| 42            | 6             | 0           | 4.259727                | -1.080496 | -1.175011 |
| 43            | 1             | 0           | 3.898570                | -1.205704 | 2.740971  |
| 44            | 1             | 0           | 6.146182                | -1.192186 | 1.663417  |

|                                              |   |   |              |           |           |
|----------------------------------------------|---|---|--------------|-----------|-----------|
| 45                                           | 1 | 0 | 4.366292     | -1.037970 | -2.255441 |
| 46                                           | 1 | 0 | 6.376071     | -1.107732 | -0.780530 |
| -----                                        |   |   |              |           |           |
| Zero-point correction=                       |   |   | 0.364585     |           |           |
| (Hartree/Particle)                           |   |   |              |           |           |
| Thermal correction to Energy=                |   |   | 0.386064     |           |           |
| Thermal correction to Enthalpy=              |   |   | 0.387008     |           |           |
| Thermal correction to Gibbs Free Energy=     |   |   | 0.313303     |           |           |
| Sum of electronic and zero-point Energies=   |   |   | -1220.550444 |           |           |
| Sum of electronic and thermal Energies=      |   |   | -1220.528964 |           |           |
| Sum of electronic and thermal Enthalpies=    |   |   | -1220.528020 |           |           |
| Sum of electronic and thermal Free Energies= |   |   | -1220.601725 |           |           |

**TS-(II-IV)t**

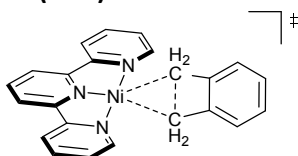

Imaginary frequency =  $-339.9511 \text{ cm}^{-1}$

| Center<br>Number | Atomic<br>Number | Atomic<br>Type | Coordinates (Angstroms) |           |           |
|------------------|------------------|----------------|-------------------------|-----------|-----------|
|                  |                  |                | X                       | Y         | Z         |
| 1                | 28               | 0              | -0.080201               | -0.324681 | 0.000522  |
| 2                | 7                | 0              | -1.727697               | 0.827658  | -0.000014 |
| 3                | 6                | 0              | -4.033263               | 2.362638  | -0.001014 |
| 4                | 6                | 0              | -1.642878               | 2.173198  | -0.000258 |
| 5                | 6                | 0              | -2.950663               | 0.205025  | -0.000299 |
| 6                | 6                | 0              | -4.124024               | 0.989074  | -0.000791 |
| 7                | 6                | 0              | -2.759061               | 2.983076  | -0.000760 |
| 8                | 1                | 0              | -5.099237               | 0.513542  | -0.000993 |
| 9                | 1                | 0              | -2.679773               | 4.063288  | -0.000971 |
| 10               | 1                | 0              | -4.931556               | 2.970495  | -0.001366 |
| 11               | 7                | 0              | 0.721657                | 1.754907  | 0.000371  |
| 12               | 6                | 0              | 1.395243                | 4.445324  | 0.000390  |
| 13               | 6                | 0              | 2.001894                | 2.139649  | 0.000678  |
| 14               | 6                | 0              | -0.249703               | 2.690697  | 0.000061  |
| 15               | 6                | 0              | 0.065490                | 4.053823  | 0.000071  |
| 16               | 6                | 0              | 2.392498                | 3.470993  | 0.000697  |
| 17               | 1                | 0              | 2.736944                | 1.336737  | 0.000930  |
| 18               | 1                | 0              | -0.722766               | 4.797186  | -0.000156 |
| 19               | 1                | 0              | 3.444262                | 3.732909  | 0.000947  |
| 20               | 1                | 0              | 1.653022                | 5.499813  | 0.000402  |
| 21               | 7                | 0              | -1.650527               | -1.795057 | 0.000546  |
| 22               | 6                | 0              | -3.917585               | -3.426998 | 0.000045  |
| 23               | 6                | 0              | -2.904303               | -1.231223 | -0.000020 |
| 24               | 6                | 0              | -1.549079               | -3.130279 | 0.000877  |
| 25               | 6                | 0              | -2.625137               | -3.995024 | 0.000670  |
| 26               | 6                | 0              | -4.053448               | -2.060830 | -0.000296 |
| 27               | 1                | 0              | -0.531322               | -3.519889 | 0.001326  |
| 28               | 1                | 0              | -2.472195               | -5.067409 | 0.000959  |
| 29               | 1                | 0              | -5.041594               | -1.613806 | -0.000810 |
| 30               | 1                | 0              | -4.797877               | -4.062358 | -0.000180 |
| 31               | 6                | 0              | 1.433783                | -1.294095 | 1.041806  |
| 32               | 1                | 0              | 1.026268                | -2.268847 | 1.325154  |
| 33               | 1                | 0              | 1.151363                | -0.545761 | 1.797455  |
| 34               | 6                | 0              | 1.433134                | -1.294467 | -1.041350 |
| 35               | 1                | 0              | 1.025331                | -2.269223 | -1.324271 |
| 36               | 1                | 0              | 1.150335                | -0.546230 | -1.796946 |

|    |   |   |          |           |           |
|----|---|---|----------|-----------|-----------|
| 37 | 6 | 0 | 2.893896 | -1.322762 | -0.691640 |
| 38 | 6 | 0 | 5.270990 | -1.368034 | 0.697318  |
| 39 | 6 | 0 | 2.894336 | -1.322417 | 0.691201  |
| 40 | 6 | 0 | 4.073100 | -1.349970 | -1.422073 |
| 41 | 6 | 0 | 5.270537 | -1.368433 | -0.699293 |
| 42 | 6 | 0 | 4.074023 | -1.349178 | 1.420876  |
| 43 | 1 | 0 | 4.077333 | -1.344000 | -2.508448 |
| 44 | 1 | 0 | 6.217311 | -1.377377 | -1.230834 |
| 45 | 1 | 0 | 4.078975 | -1.342624 | 2.507245  |
| 46 | 1 | 0 | 6.218110 | -1.376674 | 1.228250  |

```

-----
Zero-point correction=                0.363188
(Hartree/Particle)
Thermal correction to Energy=         0.385218
Thermal correction to Enthalpy=       0.386162
Thermal correction to Gibbs Free Energy= 0.309368
Sum of electronic and zero-point Energies= -1220.608099
Sum of electronic and thermal Energies= -1220.586069
Sum of electronic and thermal Enthalpies= -1220.585124
Sum of electronic and thermal Free Energies= -1220.661919

```

### IIIs

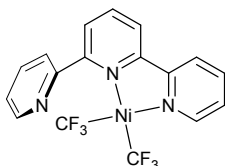

| Center Number | Atomic Number | Atomic Type | Coordinates (Angstroms) |           |           |
|---------------|---------------|-------------|-------------------------|-----------|-----------|
|               |               |             | X                       | Y         | Z         |
| 1             | 28            | 0           | 0.348446                | -0.616742 | 0.029510  |
| 2             | 9             | 0           | -1.462469               | 0.064139  | 1.949729  |
| 3             | 9             | 0           | -2.253196               | -1.554525 | 0.748403  |
| 4             | 9             | 0           | 1.770140                | -2.893681 | 0.673580  |
| 5             | 9             | 0           | 1.218975                | -2.673947 | -1.411119 |
| 6             | 9             | 0           | -0.230698               | -3.390718 | 0.021016  |
| 7             | 9             | 0           | -0.701905               | -1.936850 | 2.200896  |
| 8             | 7             | 0           | 0.047139                | 1.390374  | -0.047138 |
| 9             | 7             | 0           | -2.050454               | 0.277925  | -1.463377 |
| 10            | 7             | 0           | 2.249229                | 0.043453  | -0.450084 |
| 11            | 6             | 0           | 1.169224                | 2.108247  | 0.097141  |
| 12            | 6             | 0           | -3.552309               | 1.310642  | 0.106370  |
| 13            | 6             | 0           | -1.259036               | 3.369878  | 0.134940  |
| 14            | 6             | 0           | -4.588701               | 0.491928  | -0.324751 |
| 15            | 6             | 0           | -2.303913               | 1.161443  | -0.493235 |
| 16            | 6             | 0           | 2.424126                | 1.329598  | -0.085304 |
| 17            | 6             | 0           | -0.108461               | 4.110249  | 0.370113  |
| 18            | 6             | 0           | 0.744039                | -2.475992 | -0.124770 |
| 19            | 6             | 0           | -3.052429               | -0.499587 | -1.865548 |
| 20            | 6             | 0           | 1.131110                | 3.482551  | 0.323437  |
| 21            | 6             | 0           | 3.319170                | -0.714236 | -0.700766 |
| 22            | 6             | 0           | -4.338122               | -0.429824 | -1.333787 |
| 23            | 6             | 0           | 3.692571                | 1.884557  | 0.055089  |
| 24            | 6             | 0           | 4.618507                | -0.224692 | -0.599813 |
| 25            | 6             | 0           | 4.805475                | 1.092617  | -0.205473 |
| 26            | 6             | 0           | -1.089271               | -1.061739 | 1.239961  |
| 27            | 6             | 0           | -1.142681               | 1.998276  | -0.092410 |
| 28            | 1             | 0           | -3.690541               | 2.016636  | 0.918615  |
| 29            | 1             | 0           | -2.233440               | 3.842953  | 0.086997  |

|                                              |   |   |           |              |           |
|----------------------------------------------|---|---|-----------|--------------|-----------|
| 30                                           | 1 | 0 | -5.571228 | 0.564019     | 0.130634  |
| 31                                           | 1 | 0 | -0.170732 | 5.179165     | 0.546797  |
| 32                                           | 1 | 0 | -2.813593 | -1.216529    | -2.646577 |
| 33                                           | 1 | 0 | 2.041705  | 4.056346     | 0.443674  |
| 34                                           | 1 | 0 | 3.114550  | -1.738454    | -0.984907 |
| 35                                           | 1 | 0 | -5.114215 | -1.095002    | -1.695549 |
| 36                                           | 1 | 0 | 3.815672  | 2.914555     | 0.367305  |
| 37                                           | 1 | 0 | 5.456842  | -0.875370    | -0.818897 |
| 38                                           | 1 | 0 | 5.803691  | 1.504926     | -0.099892 |
| -----                                        |   |   |           |              |           |
| Zero-point correction=                       |   |   |           | 0.261394     |           |
| (Hartree/Particle)                           |   |   |           |              |           |
| Thermal correction to Energy=                |   |   |           | 0.284425     |           |
| Thermal correction to Enthalpy=              |   |   |           | 0.285369     |           |
| Thermal correction to Gibbs Free Energy=     |   |   |           | 0.208389     |           |
| Sum of electronic and zero-point Energies=   |   |   |           | -1586.276594 |           |
| Sum of electronic and thermal Energies=      |   |   |           | -1586.253564 |           |
| Sum of electronic and thermal Enthalpies=    |   |   |           | -1586.252620 |           |
| Sum of electronic and thermal Free Energies= |   |   |           | -1586.329599 |           |

IIIc

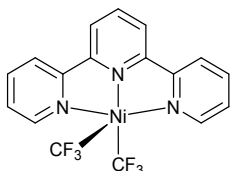

| -----            |                  |                |                         |           |           |  |
|------------------|------------------|----------------|-------------------------|-----------|-----------|--|
| Center<br>Number | Atomic<br>Number | Atomic<br>Type | Coordinates (Angstroms) |           |           |  |
|                  |                  |                | X                       | Y         | Z         |  |
| -----            |                  |                |                         |           |           |  |
| 1                | 28               | 0              | 0.046032                | -0.656007 | -0.216160 |  |
| 2                | 9                | 0              | -0.957007               | 0.653878  | 2.143991  |  |
| 3                | 9                | 0              | -0.996848               | -1.502782 | 2.332991  |  |
| 4                | 9                | 0              | 1.091297                | -3.288524 | 0.294594  |  |
| 5                | 9                | 0              | 0.968482                | -2.821896 | -1.810267 |  |
| 6                | 9                | 0              | -0.806105               | -3.463307 | -0.735844 |  |
| 7                | 9                | 0              | 0.870592                | -0.429432 | 2.577637  |  |
| 8                | 7                | 0              | -0.037102               | 1.423638  | -0.443827 |  |
| 9                | 7                | 0              | -2.055518               | -0.237212 | -0.537654 |  |
| 10               | 7                | 0              | 2.118612                | -0.051102 | -0.305737 |  |
| 11               | 6                | 0              | 1.097565                | 2.114681  | -0.341465 |  |
| 12               | 6                | 0              | -3.715018               | 1.471134  | -0.422763 |  |
| 13               | 6                | 0              | -1.337150               | 3.397022  | -0.328544 |  |
| 14               | 6                | 0              | -4.712194               | 0.500184  | -0.435441 |  |
| 15               | 6                | 0              | -2.385622               | 1.063099  | -0.468652 |  |
| 16               | 6                | 0              | 2.331595                | 1.274907  | -0.316879 |  |
| 17               | 6                | 0              | -0.164979               | 4.140793  | -0.241906 |  |
| 18               | 6                | 0              | 0.290192                | -2.645689 | -0.617295 |  |
| 19               | 6                | 0              | -3.005302               | -1.169406 | -0.539508 |  |
| 20               | 6                | 0              | 1.072769                | 3.505336  | -0.240415 |  |
| 21               | 6                | 0              | 3.147536                | -0.893889 | -0.264252 |  |
| 22               | 6                | 0              | -4.358345               | -0.841645 | -0.491456 |  |
| 23               | 6                | 0              | 3.618983                | 1.803097  | -0.298360 |  |
| 24               | 6                | 0              | 4.465542                | -0.443507 | -0.237881 |  |
| 25               | 6                | 0              | 4.699116                | 0.925568  | -0.258443 |  |
| 26               | 6                | 0              | -0.253461               | -0.491467 | 1.806487  |  |
| 27               | 6                | 0              | -1.233304               | 2.009263  | -0.420519 |  |
| 28               | 1                | 0              | -3.975365               | 2.521758  | -0.367278 |  |
| 29               | 1                | 0              | -2.300841               | 3.891485  | -0.310522 |  |
| 30               | 1                | 0              | -5.756038               | 0.794636  | -0.396039 |  |

|                                              |   |   |           |              |           |
|----------------------------------------------|---|---|-----------|--------------|-----------|
| 31                                           | 1 | 0 | -0.216740 | 5.221793     | -0.162357 |
| 32                                           | 1 | 0 | -2.649447 | -2.195241    | -0.576288 |
| 33                                           | 1 | 0 | 1.985939  | 4.080958     | -0.148179 |
| 34                                           | 1 | 0 | 2.890520  | -1.948952    | -0.245825 |
| 35                                           | 1 | 0 | -5.107551 | -1.624820    | -0.493256 |
| 36                                           | 1 | 0 | 3.783356  | 2.874190     | -0.317018 |
| 37                                           | 1 | 0 | 5.281283  | -1.156042    | -0.201639 |
| 38                                           | 1 | 0 | 5.712796  | 1.312853     | -0.242774 |
| -----                                        |   |   |           |              |           |
| Zero-point correction=                       |   |   |           | 0.259644     |           |
| (Hartree/Particle)                           |   |   |           |              |           |
| Thermal correction to Energy=                |   |   |           | 0.283602     |           |
| Thermal correction to Enthalpy=              |   |   |           | 0.284546     |           |
| Thermal correction to Gibbs Free Energy=     |   |   |           | 0.202237     |           |
| Sum of electronic and zero-point Energies=   |   |   |           | -1586.285768 |           |
| Sum of electronic and thermal Energies=      |   |   |           | -1586.261809 |           |
| Sum of electronic and thermal Enthalpies=    |   |   |           | -1586.260865 |           |
| Sum of electronic and thermal Free Energies= |   |   |           | -1586.343175 |           |

### TS-(III-IV)t

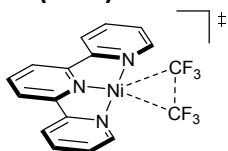

Imaginary frequency =  $-270.8174 \text{ cm}^{-1}$

| -----         |               |             |                         |           |           |  |
|---------------|---------------|-------------|-------------------------|-----------|-----------|--|
| Center Number | Atomic Number | Atomic Type | Coordinates (Angstroms) |           |           |  |
|               |               |             | X                       | Y         | Z         |  |
| -----         |               |             |                         |           |           |  |
| 1             | 28            | 0           | 0.019151                | -0.306852 | 0.016016  |  |
| 2             | 9             | 0           | 0.768286                | -1.577182 | -1.913582 |  |
| 3             | 9             | 0           | 0.519192                | -3.491371 | -1.040178 |  |
| 4             | 9             | 0           | -1.020716               | -3.292132 | 0.862974  |  |
| 5             | 9             | 0           | -0.540078               | -1.536809 | 1.957683  |  |
| 6             | 9             | 0           | 1.057399                | -2.803283 | 1.272905  |  |
| 7             | 9             | 0           | -1.228181               | -2.301844 | -1.486852 |  |
| 8             | 7             | 0           | 0.035018                | 1.673271  | -0.007160 |  |
| 9             | 7             | 0           | 2.104841                | 0.074873  | 0.086387  |  |
| 10            | 7             | 0           | -2.100994               | 0.169435  | 0.009574  |  |
| 11            | 6             | 0           | -1.118771               | 2.366118  | -0.050732 |  |
| 12            | 6             | 0           | 3.725324                | 1.869639  | 0.080768  |  |
| 13            | 6             | 0           | 1.283686                | 3.711972  | -0.034459 |  |
| 14            | 6             | 0           | 4.756189                | 0.961756  | 0.102274  |  |
| 15            | 6             | 0           | 2.383506                | 1.422291  | 0.063805  |  |
| 16            | 6             | 0           | -2.325116               | 1.504395  | -0.024616 |  |
| 17            | 6             | 0           | 0.103551                | 4.426221  | -0.090428 |  |
| 18            | 6             | 0           | -0.122382               | -2.305246 | 0.932231  |  |
| 19            | 6             | 0           | 3.131778                | -0.788848 | 0.096935  |  |
| 20            | 6             | 0           | -1.137401               | 3.744744  | -0.096404 |  |
| 21            | 6             | 0           | -3.149514               | -0.659311 | 0.079493  |  |
| 22            | 6             | 0           | 4.459941                | -0.416827 | 0.104832  |  |
| 23            | 6             | 0           | -3.626830               | 2.016118  | -0.012942 |  |
| 24            | 6             | 0           | -4.465198               | -0.225360 | 0.102810  |  |
| 25            | 6             | 0           | -4.704403               | 1.148041  | 0.048532  |  |
| 26            | 6             | 0           | 0.020782                | -2.256553 | -1.036198 |  |
| 27            | 6             | 0           | 1.246995                | 2.305959  | 0.008839  |  |
| 28            | 1             | 0           | 3.936353                | 2.933363  | 0.072224  |  |
| 29            | 1             | 0           | 2.231807                | 4.239232  | -0.025881 |  |
| 30            | 1             | 0           | 5.786083                | 1.304628  | 0.113407  |  |

|                                              |   |   |           |              |           |
|----------------------------------------------|---|---|-----------|--------------|-----------|
| 31                                           | 1 | 0 | 0.124120  | 5.509899     | -0.127454 |
| 32                                           | 1 | 0 | 2.857762  | -1.840717    | 0.098813  |
| 33                                           | 1 | 0 | -2.064546 | 4.303887     | -0.135302 |
| 34                                           | 1 | 0 | -2.914400 | -1.718714    | 0.116884  |
| 35                                           | 1 | 0 | 5.240245  | -1.168200    | 0.114456  |
| 36                                           | 1 | 0 | -3.788281 | 3.086944     | -0.044496 |
| 37                                           | 1 | 0 | -5.274926 | -0.943216    | 0.161731  |
| 38                                           | 1 | 0 | -5.718453 | 1.534636     | 0.060567  |
| -----                                        |   |   |           |              |           |
| Zero-point correction=                       |   |   |           | 0.258277     |           |
| (Hartree/Particle)                           |   |   |           |              |           |
| Thermal correction to Energy=                |   |   |           | 0.280767     |           |
| Thermal correction to Enthalpy=              |   |   |           | 0.281711     |           |
| Thermal correction to Gibbs Free Energy=     |   |   |           | 0.204454     |           |
| Sum of electronic and zero-point Energies=   |   |   |           | -1586.214858 |           |
| Sum of electronic and thermal Energies=      |   |   |           | -1586.192368 |           |
| Sum of electronic and thermal Enthalpies=    |   |   |           | -1586.191424 |           |
| Sum of electronic and thermal Free Energies= |   |   |           | -1586.268681 |           |

#### IVs

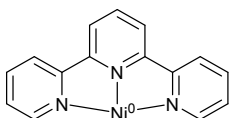

| -----                  |               |             |                         |           |           |  |
|------------------------|---------------|-------------|-------------------------|-----------|-----------|--|
| Center Number          | Atomic Number | Atomic Type | Coordinates (Angstroms) |           |           |  |
|                        |               |             | X                       | Y         | Z         |  |
| -----                  |               |             |                         |           |           |  |
| 1                      | 1             | 0           | -0.055464               | -0.258751 | -5.679816 |  |
| 2                      | 6             | 0           | 0.216194                | -0.155738 | -4.634244 |  |
| 3                      | 7             | 0           | 0.925894                | 0.136841  | -1.948858 |  |
| 4                      | 6             | 0           | -0.750663               | -0.208003 | -3.653013 |  |
| 5                      | 6             | 0           | 1.561136                | 0.008998  | -4.259806 |  |
| 6                      | 6             | 0           | 1.858423                | 0.150630  | -2.920540 |  |
| 7                      | 6             | 0           | -0.382109               | -0.078095 | -2.304064 |  |
| 8                      | 1             | 0           | -1.792260               | -0.380114 | -3.903261 |  |
| 9                      | 1             | 0           | 2.353240                | 0.047344  | -4.998297 |  |
| 10                     | 1             | 0           | 2.878308                | 0.314494  | -2.585100 |  |
| 11                     | 6             | 0           | -1.295723               | -0.148842 | -1.182054 |  |
| 12                     | 6             | 0           | -2.641032               | 0.185884  | 1.203401  |  |
| 13                     | 6             | 0           | -2.641032               | 0.185884  | -1.203401 |  |
| 14                     | 7             | 0           | -0.658427               | -0.472096 | 0.000000  |  |
| 15                     | 6             | 0           | -1.295723               | -0.148842 | 1.182054  |  |
| 16                     | 6             | 0           | -3.344600               | 0.299740  | 0.000000  |  |
| 17                     | 1             | 0           | -3.128298               | 0.410968  | -2.147378 |  |
| 18                     | 1             | 0           | -4.391822               | 0.578680  | 0.000000  |  |
| 19                     | 1             | 0           | -3.128298               | 0.410968  | 2.147378  |  |
| 20                     | 6             | 0           | -0.382109               | -0.078095 | 2.304064  |  |
| 21                     | 6             | 0           | 1.561136                | 0.008998  | 4.259806  |  |
| 22                     | 6             | 0           | -0.750663               | -0.208003 | 3.653013  |  |
| 23                     | 7             | 0           | 0.925894                | 0.136841  | 1.948858  |  |
| 24                     | 6             | 0           | 1.858423                | 0.150630  | 2.920540  |  |
| 25                     | 6             | 0           | 0.216194                | -0.155738 | 4.634244  |  |
| 26                     | 1             | 0           | -1.792260               | -0.380114 | 3.903261  |  |
| 27                     | 1             | 0           | 2.878308                | 0.314494  | 2.585100  |  |
| 28                     | 1             | 0           | -0.055464               | -0.258751 | 5.679816  |  |
| 29                     | 1             | 0           | 2.353240                | 0.047344  | 4.998297  |  |
| 30                     | 28            | 0           | 1.171433                | 0.060211  | -0.000000 |  |
| -----                  |               |             |                         |           |           |  |
| Zero-point correction= |               |             |                         | 0.229752  |           |  |
| (Hartree/Particle)     |               |             |                         |           |           |  |



Thermal correction to Energy= 0.243869  
 Thermal correction to Enthalpy= 0.244813  
 Thermal correction to Gibbs Free Energy= 0.188635  
 Sum of electronic and zero-point Energies= -911.225343  
 Sum of electronic and thermal Energies= -911.211226  
 Sum of electronic and thermal Enthalpies= -911.210282  
 Sum of electronic and thermal Free Energies= -911.266460

IVt

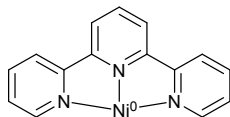

| Center Number | Atomic Number | Atomic Type | Coordinates (Angstroms) |           |           |
|---------------|---------------|-------------|-------------------------|-----------|-----------|
|               |               |             | X                       | Y         | Z         |
| 1             | 1             | 0           | 0.000053                | 0.246610  | 5.734017  |
| 2             | 6             | 0           | 0.000030                | -0.092343 | 4.703062  |
| 3             | 7             | 0           | -0.000022               | -0.963824 | 2.045832  |
| 4             | 6             | 0           | 0.000057                | 0.820443  | 3.669324  |
| 5             | 6             | 0           | -0.000022               | -1.463675 | 4.399784  |
| 6             | 6             | 0           | -0.000045               | -1.833155 | 3.068938  |
| 7             | 6             | 0           | 0.000027                | 0.378366  | 2.335434  |
| 8             | 1             | 0           | 0.000107                | 1.884588  | 3.878478  |
| 9             | 1             | 0           | -0.000040               | -2.219112 | 5.176667  |
| 10            | 1             | 0           | -0.000083               | -2.883501 | 2.789484  |
| 11            | 6             | 0           | 0.000057                | 1.284442  | 1.187576  |
| 12            | 6             | 0           | -0.000001               | 2.674061  | -1.215736 |
| 13            | 6             | 0           | -0.000001               | 2.674061  | 1.215736  |
| 14            | 7             | 0           | 0.000122                | 0.636769  | -0.000000 |
| 15            | 6             | 0           | 0.000057                | 1.284442  | -1.187576 |
| 16            | 6             | 0           | -0.000014               | 3.370593  | -0.000000 |
| 17            | 1             | 0           | -0.000056               | 3.221894  | 2.152336  |
| 18            | 1             | 0           | -0.000062               | 4.454903  | -0.000000 |
| 19            | 1             | 0           | -0.000056               | 3.221894  | -2.152336 |
| 20            | 6             | 0           | 0.000027                | 0.378366  | -2.335434 |
| 21            | 6             | 0           | -0.000022               | -1.463675 | -4.399784 |
| 22            | 6             | 0           | 0.000057                | 0.820443  | -3.669324 |
| 23            | 7             | 0           | -0.000022               | -0.963824 | -2.045832 |
| 24            | 6             | 0           | -0.000045               | -1.833155 | -3.068938 |
| 25            | 6             | 0           | 0.000030                | -0.092343 | -4.703062 |
| 26            | 1             | 0           | 0.000107                | 1.884588  | -3.878478 |
| 27            | 1             | 0           | -0.000083               | -2.883501 | -2.789484 |
| 28            | 1             | 0           | 0.000053                | 0.246610  | -5.734017 |
| 29            | 1             | 0           | -0.000040               | -2.219112 | -5.176667 |
| 30            | 28            | 0           | -0.000057               | -1.334320 | 0.000000  |

Zero-point correction= 0.226976  
 (Hartree/Particle)  
 Thermal correction to Energy= 0.241375  
 Thermal correction to Enthalpy= 0.242319  
 Thermal correction to Gibbs Free Energy= 0.184188  
 Sum of electronic and zero-point Energies= -911.280780  
 Sum of electronic and thermal Energies= -911.266381  
 Sum of electronic and thermal Enthalpies= -911.265437  
 Sum of electronic and thermal Free Energies= -911.323568

## Ethane

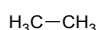

| Center Number | Atomic Number | Atomic Type | Coordinates (Angstroms) |           |           |
|---------------|---------------|-------------|-------------------------|-----------|-----------|
|               |               |             | X                       | Y         | Z         |
| 1             | 1             | 0           | 0.000000                | 1.019507  | 1.159380  |
| 2             | 6             | 0           | 0.000000                | 0.000000  | 0.763044  |
| 3             | 1             | 0           | 0.882919                | -0.509753 | 1.159380  |
| 4             | 1             | 0           | -0.882919               | -0.509753 | 1.159380  |
| 5             | 6             | 0           | -0.000000               | -0.000000 | -0.763044 |
| 6             | 1             | 0           | 0.882919                | 0.509753  | -1.159380 |
| 7             | 1             | 0           | -0.882919               | 0.509753  | -1.159380 |
| 8             | 1             | 0           | -0.000000               | -1.019507 | -1.159380 |

Zero-point correction= 0.075739  
(Hartree/Particle)  
Thermal correction to Energy= 0.079231  
Thermal correction to Enthalpy= 0.080175  
Thermal correction to Gibbs Free Energy= 0.054302  
Sum of electronic and zero-point Energies= -79.695216  
Sum of electronic and thermal Energies= -79.691724  
Sum of electronic and thermal Enthalpies= -79.690780  
Sum of electronic and thermal Free Energies= -79.716653

## Benzocyclobutane

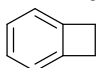

| Center Number | Atomic Number | Atomic Type | Coordinates (Angstroms) |           |           |
|---------------|---------------|-------------|-------------------------|-----------|-----------|
|               |               |             | X                       | Y         | Z         |
| 1             | 1             | 0           | 0.000000                | 2.522226  | -0.733401 |
| 2             | 6             | 0           | 0.000000                | 1.436420  | -0.717749 |
| 3             | 6             | 0           | -0.000000               | -1.436420 | -0.717749 |
| 4             | 6             | 0           | 0.000000                | 0.695320  | 0.452344  |
| 5             | 6             | 0           | 0.000000                | 0.699472  | -1.907970 |
| 6             | 6             | 0           | -0.000000               | -0.699472 | -1.907970 |
| 7             | 6             | 0           | -0.000000               | -0.695320 | 0.452344  |
| 8             | 1             | 0           | 0.000000                | 1.223787  | -2.859119 |
| 9             | 1             | 0           | -0.000000               | -1.223787 | -2.859119 |
| 10            | 1             | 0           | -0.000000               | -2.522226 | -0.733401 |
| 11            | 6             | 0           | 0.000000                | 0.785891  | 1.967897  |
| 12            | 1             | 0           | -0.889857               | 1.240360  | 2.412694  |
| 13            | 1             | 0           | 0.889857                | 1.240360  | 2.412694  |
| 14            | 6             | 0           | -0.000000               | -0.785891 | 1.967897  |
| 15            | 1             | 0           | -0.889857               | -1.240360 | 2.412694  |
| 16            | 1             | 0           | 0.889857                | -1.240360 | 2.412694  |

Zero-point correction= 0.136202  
(Hartree/Particle)  
Thermal correction to Energy= 0.142181  
Thermal correction to Enthalpy= 0.143125  
Thermal correction to Gibbs Free Energy= 0.106977  
Sum of electronic and zero-point Energies= -309.346322  
Sum of electronic and thermal Energies= -309.340343  
Sum of electronic and thermal Enthalpies= -309.339399  
Sum of electronic and thermal Free Energies= -309.375547

## Hexafluoroethane

CF<sub>3</sub>-CF<sub>3</sub>

| Center Number | Atomic Number | Atomic Type | Coordinates (Angstroms) |           |           |
|---------------|---------------|-------------|-------------------------|-----------|-----------|
|               |               |             | X                       | Y         | Z         |
| 1             | 6             | 0           | 0.000000                | 0.000000  | 0.765543  |
| 2             | 6             | 0           | -0.000000               | -0.000000 | -0.765543 |
| 3             | 9             | 0           | 1.083323                | 0.625457  | -1.212162 |
| 4             | 9             | 0           | -1.083323               | 0.625457  | -1.212162 |
| 5             | 9             | 0           | 0.000000                | 1.250914  | 1.212162  |
| 6             | 9             | 0           | 1.083323                | -0.625457 | 1.212162  |
| 7             | 9             | 0           | -0.000000               | -1.250914 | -1.212162 |
| 8             | 9             | 0           | -1.083323               | -0.625457 | 1.212162  |

Zero-point correction= 0.030776  
 (Hartree/Particle)  
 Thermal correction to Energy= 0.037466  
 Thermal correction to Enthalpy= 0.038410  
 Thermal correction to Gibbs Free Energy= 0.000680  
 Sum of electronic and zero-point Energies= -675.007663  
 Sum of electronic and thermal Energies= -675.000973  
 Sum of electronic and thermal Enthalpies= -675.000029  
 Sum of electronic and thermal Free Energies= -675.037759

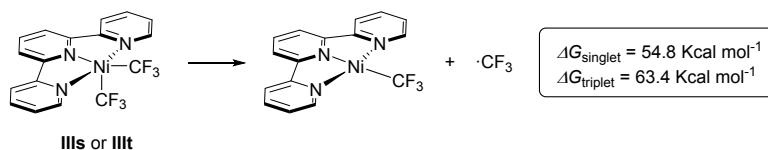

## TPY-Ni-CF<sub>3</sub>

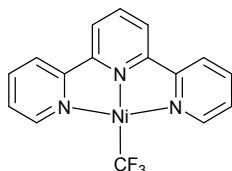

| Center Number | Atomic Number | Atomic Type | Coordinates (Angstroms) |           |           |
|---------------|---------------|-------------|-------------------------|-----------|-----------|
|               |               |             | X                       | Y         | Z         |
| 1             | 1             | 0           | -5.774034               | 0.488471  | -0.000407 |
| 2             | 6             | 0           | -4.716294               | 0.245511  | -0.000370 |
| 3             | 7             | 0           | -1.990025               | -0.399527 | -0.000184 |
| 4             | 6             | 0           | -3.774469               | 1.245182  | -0.000036 |
| 5             | 6             | 0           | -4.288254               | -1.096230 | -0.000719 |
| 6             | 6             | 0           | -2.934362               | -1.359813 | -0.000600 |
| 7             | 6             | 0           | -2.402258               | 0.920701  | 0.000010  |
| 8             | 1             | 0           | -4.071843               | 2.288428  | 0.000157  |
| 9             | 1             | 0           | -4.994058               | -1.917624 | -0.001079 |
| 10            | 1             | 0           | -2.563333               | -2.374619 | -0.000855 |
| 11            | 6             | 0           | -1.341271               | 1.878707  | 0.000147  |
| 12            | 6             | 0           | 1.003107                | 3.391781  | 0.000307  |
| 13            | 6             | 0           | -1.422421               | 3.280516  | 0.000358  |
| 14            | 7             | 0           | -0.106379               | 1.289396  | 0.000035  |

|    |    |   |           |           |           |
|----|----|---|-----------|-----------|-----------|
| 15 | 6  | 0 | 1.032724  | 2.015953  | 0.000101  |
| 16 | 6  | 0 | -0.262449 | 4.031506  | 0.000438  |
| 17 | 1  | 0 | -2.389849 | 3.771977  | 0.000445  |
| 18 | 1  | 0 | -0.316926 | 5.114255  | 0.000609  |
| 19 | 1  | 0 | 1.914647  | 3.977701  | 0.000367  |
| 20 | 6  | 0 | 2.224134  | 1.155184  | -0.000083 |
| 21 | 6  | 0 | 4.307897  | -0.629849 | -0.000624 |
| 22 | 6  | 0 | 3.533414  | 1.634595  | -0.000152 |
| 23 | 7  | 0 | 1.956914  | -0.180608 | -0.000251 |
| 24 | 6  | 0 | 2.984546  | -1.042977 | -0.000530 |
| 25 | 6  | 0 | 4.587415  | 0.735447  | -0.000413 |
| 26 | 1  | 0 | 3.713182  | 2.703362  | -0.000017 |
| 27 | 1  | 0 | 2.726225  | -2.092154 | -0.000704 |
| 28 | 1  | 0 | 5.612222  | 1.092267  | -0.000481 |
| 29 | 1  | 0 | 5.098489  | -1.370721 | -0.000866 |
| 30 | 28 | 0 | -0.016594 | -0.600998 | 0.000009  |
| 31 | 6  | 0 | 0.220442  | -2.531282 | 0.000451  |
| 32 | 9  | 0 | 0.970251  | -2.918341 | 1.083221  |
| 33 | 9  | 0 | -0.831319 | -3.392396 | 0.001190  |
| 34 | 9  | 0 | 0.969396  | -2.919019 | -1.082671 |

```
-----
Zero-point correction=                0.245683
(Hartree/Particle)
Thermal correction to Energy=         0.264014
Thermal correction to Enthalpy=       0.264958
Thermal correction to Gibbs Free Energy= 0.197805
Sum of electronic and zero-point Energies= -1248.786794
Sum of electronic and thermal Energies= -1248.768463
Sum of electronic and thermal Enthalpies= -1248.767519
Sum of electronic and thermal Free Energies= -1248.834672
```

### •CF<sub>3</sub>

```
-----
```

| Center<br>Number | Atomic<br>Number | Atomic<br>Type | Coordinates (Angstroms) |           |          |
|------------------|------------------|----------------|-------------------------|-----------|----------|
|                  |                  |                | X                       | Y         | Z        |
| 1                | 6                | 0              | 0.000000                | 0.000000  | 0.000000 |
| 2                | 9                | 0              | 0.000000                | 1.311603  | 0.000000 |
| 3                | 9                | 0              | 1.135882                | -0.655802 | 0.000000 |
| 4                | 9                | 0              | -1.135882               | -0.655802 | 0.000000 |

```
-----
```

```
Zero-point correction=                0.011198
(Hartree/Particle)
Thermal correction to Energy=         0.014570
Thermal correction to Enthalpy=       0.015514
Thermal correction to Gibbs Free Energy= -0.013894
Sum of electronic and zero-point Energies= -337.382456
Sum of electronic and thermal Energies= -337.379084
Sum of electronic and thermal Enthalpies= -337.378139
Sum of electronic and thermal Free Energies= -337.407547
```

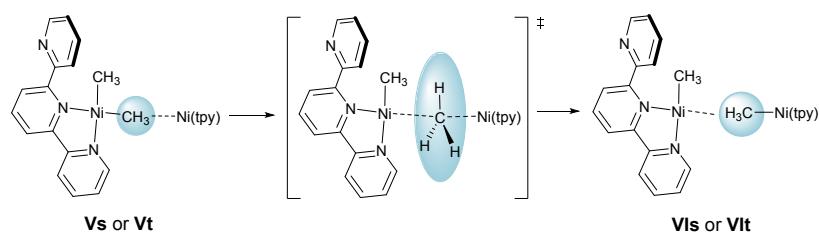

|              | <b>Vs</b> | <b>Vt</b> |
|--------------|-----------|-----------|
| $\Delta G_a$ | 4.3       | 15.7      |
| $\Delta G$   | 0.1       | -7.3      |

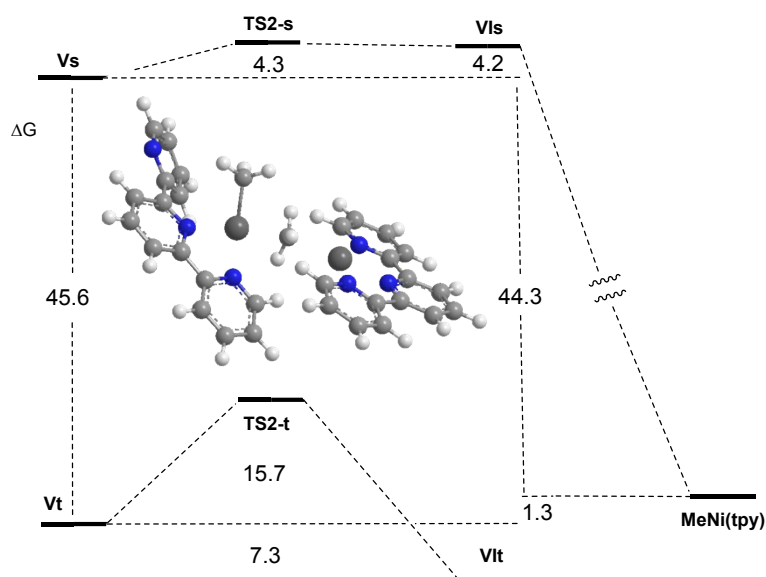

**Vs**

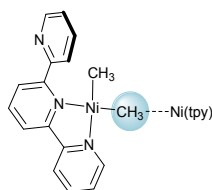

| Center Number | Atomic Number | Atomic Type | Coordinates (Angstroms) |           |           |
|---------------|---------------|-------------|-------------------------|-----------|-----------|
|               |               |             | X                       | Y         | Z         |
| 1             | 6             | 0           | -0.307686               | -2.661403 | -0.818672 |
| 2             | 6             | 0           | -0.184936               | -3.988960 | -1.216543 |
| 3             | 6             | 0           | -1.338017               | -4.759568 | -1.300805 |
| 4             | 7             | 0           | -1.480986               | -2.105765 | -0.515748 |
| 5             | 6             | 0           | -2.567162               | -4.176974 | -1.008410 |
| 6             | 6             | 0           | -2.605152               | -2.838734 | -0.622465 |
| 7             | 6             | 0           | -3.867195               | -2.090616 | -0.368328 |
| 8             | 7             | 0           | -3.706655               | -0.771181 | -0.154396 |
| 9             | 6             | 0           | -5.128741               | -2.676664 | -0.409360 |
| 10            | 6             | 0           | -6.246570               | -1.861839 | -0.255084 |
| 11            | 6             | 0           | -4.780809               | 0.026493  | -0.107412 |
| 12            | 6             | 0           | -6.078552               | -0.491858 | -0.131031 |
| 13            | 6             | 0           | -4.564398               | 1.497516  | -0.117606 |
| 14            | 6             | 0           | -3.424666               | 2.041644  | -0.714126 |
| 15            | 7             | 0           | -5.544494               | 2.240183  | 0.404603  |
| 16            | 6             | 0           | -3.285107               | 3.423143  | -0.731329 |

|    |    |   |           |           |           |
|----|----|---|-----------|-----------|-----------|
| 17 | 6  | 0 | -5.390592 | 3.562622  | 0.393245  |
| 18 | 6  | 0 | -4.280741 | 4.203833  | -0.154022 |
| 19 | 28 | 0 | -1.813038 | -0.405057 | 0.627070  |
| 20 | 6  | 0 | 0.068251  | -0.258262 | 1.180608  |
| 21 | 6  | 0 | -2.318142 | 0.867996  | 1.999436  |
| 22 | 1  | 0 | 0.567848  | -2.023330 | -0.736803 |
| 23 | 1  | 0 | 0.796961  | -4.393332 | -1.435941 |
| 24 | 1  | 0 | -1.288026 | -5.801827 | -1.598920 |
| 25 | 1  | 0 | -3.477969 | -4.758312 | -1.087130 |
| 26 | 1  | 0 | -5.245314 | -3.743771 | -0.554240 |
| 27 | 1  | 0 | -7.241668 | -2.294919 | -0.266320 |
| 28 | 1  | 0 | -6.913138 | 0.194793  | -0.059591 |
| 29 | 1  | 0 | -2.672921 | 1.393121  | -1.151069 |
| 30 | 1  | 0 | -2.412251 | 3.876357  | -1.191379 |
| 31 | 1  | 0 | -6.196299 | 4.139459  | 0.840811  |
| 32 | 1  | 0 | -4.211273 | 5.285879  | -0.135545 |
| 33 | 1  | 0 | 0.291924  | 0.601395  | 1.814368  |
| 34 | 1  | 0 | 0.480093  | -0.168567 | 0.152312  |
| 35 | 1  | 0 | 0.381178  | -1.186166 | 1.666634  |
| 36 | 1  | 0 | -1.874903 | 0.560916  | 2.953097  |
| 37 | 1  | 0 | -3.409478 | 0.904870  | 2.125584  |
| 38 | 1  | 0 | -1.968833 | 1.886349  | 1.783799  |
| 39 | 6  | 0 | 0.691350  | 2.744588  | 0.035331  |
| 40 | 6  | 0 | 0.560042  | 4.103214  | -0.139128 |
| 41 | 6  | 0 | 1.715277  | 4.865040  | -0.422101 |
| 42 | 7  | 0 | 1.872341  | 2.095936  | -0.065655 |
| 43 | 6  | 0 | 2.929300  | 4.228031  | -0.510368 |
| 44 | 6  | 0 | 3.004190  | 2.830901  | -0.336291 |
| 45 | 6  | 0 | 4.203544  | 2.045930  | -0.368452 |
| 46 | 7  | 0 | 4.050450  | 0.807182  | 0.248587  |
| 47 | 6  | 0 | 5.393654  | 2.393924  | -0.973639 |
| 48 | 6  | 0 | 6.423947  | 1.443316  | -1.088572 |
| 49 | 6  | 0 | 4.966408  | -0.196254 | -0.078545 |
| 50 | 6  | 0 | 6.172965  | 0.132903  | -0.686873 |
| 51 | 6  | 0 | 4.495384  | -1.497909 | 0.234438  |
| 52 | 6  | 0 | 5.302286  | -2.656400 | 0.350672  |
| 53 | 7  | 0 | 3.130416  | -1.563828 | 0.479403  |
| 54 | 6  | 0 | 4.747013  | -3.855821 | 0.707206  |
| 55 | 6  | 0 | 2.627548  | -2.750676 | 0.895069  |
| 56 | 6  | 0 | 3.359322  | -3.906638 | 0.999856  |
| 57 | 28 | 0 | 2.296977  | 0.233437  | 0.450105  |
| 58 | 1  | 0 | -0.172903 | 2.123934  | 0.263507  |
| 59 | 1  | 0 | -0.412949 | 4.569649  | -0.036599 |
| 60 | 1  | 0 | 1.648224  | 5.941063  | -0.547592 |
| 61 | 1  | 0 | 3.842325  | 4.786483  | -0.688427 |
| 62 | 1  | 0 | 5.508911  | 3.381372  | -1.410874 |
| 63 | 1  | 0 | 7.353124  | 1.699031  | -1.583953 |
| 64 | 1  | 0 | 6.897828  | -0.649049 | -0.895008 |
| 65 | 1  | 0 | 6.369399  | -2.568678 | 0.173555  |
| 66 | 1  | 0 | 5.362386  | -4.745543 | 0.794538  |
| 67 | 1  | 0 | 1.569502  | -2.752624 | 1.139056  |
| 68 | 1  | 0 | 2.878371  | -4.825998 | 1.313488  |

-----

|                                            |              |
|--------------------------------------------|--------------|
| Zero-point correction=                     | 0.536823     |
| (Hartree/Particle)                         |              |
| Thermal correction to Energy=              | 0.571349     |
| Thermal correction to Enthalpy=            | 0.572293     |
| Thermal correction to Gibbs Free Energy=   | 0.469557     |
| Sum of electronic and zero-point Energies= | -1902.172727 |
| Sum of electronic and thermal Energies=    | -1902.138201 |
| Sum of electronic and thermal Enthalpies=  | -1902.137257 |

Sum of electronic and thermal Free Energies=

-1902.239993

**Vt**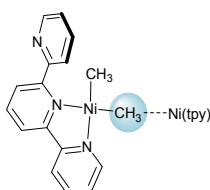

| Center Number | Atomic Number | Atomic Type | Coordinates (Angstroms) |           |           |
|---------------|---------------|-------------|-------------------------|-----------|-----------|
|               |               |             | X                       | Y         | Z         |
| 1             | 6             | 0           | -0.827370               | -0.048788 | 1.736654  |
| 2             | 6             | 0           | -1.668765               | -1.063042 | 2.186388  |
| 3             | 6             | 0           | -1.200100               | -2.368288 | 2.157002  |
| 4             | 7             | 0           | 0.409921                | -0.278205 | 1.292978  |
| 5             | 6             | 0           | 0.091238                | -2.615631 | 1.706365  |
| 6             | 6             | 0           | 0.872907                | -1.540991 | 1.281147  |
| 7             | 6             | 0           | 2.282245                | -1.695577 | 0.836166  |
| 8             | 7             | 0           | 2.928194                | -0.546630 | 0.571368  |
| 9             | 6             | 0           | 2.918754                | -2.933314 | 0.747269  |
| 10            | 6             | 0           | 4.263268                | -2.968052 | 0.403189  |
| 11            | 6             | 0           | 4.245814                | -0.574652 | 0.324784  |
| 12            | 6             | 0           | 4.947941                | -1.775806 | 0.213314  |
| 13            | 6             | 0           | 4.981787                | 0.716118  | 0.250079  |
| 14            | 6             | 0           | 4.514221                | 1.845144  | 0.926338  |
| 15            | 7             | 0           | 6.128977                | 0.697415  | -0.435890 |
| 16            | 6             | 0           | 5.260661                | 3.013897  | 0.852456  |
| 17            | 6             | 0           | 6.828874                | 1.827409  | -0.504617 |
| 18            | 6             | 0           | 6.439524                | 3.012656  | 0.115146  |
| 19            | 28            | 0           | 1.534873                | 0.918786  | 0.010096  |
| 20            | 6             | 0           | 0.160105                | 2.236904  | -0.446187 |
| 21            | 6             | 0           | 2.548709                | 1.611759  | -1.509165 |
| 22            | 1             | 0           | -1.156738               | 0.984672  | 1.723214  |
| 23            | 1             | 0           | -2.678140               | -0.828907 | 2.508322  |
| 24            | 1             | 0           | -1.840104               | -3.189838 | 2.463734  |
| 25            | 1             | 0           | 0.471962                | -3.628330 | 1.671559  |
| 26            | 1             | 0           | 2.371394                | -3.851222 | 0.921367  |
| 27            | 1             | 0           | 4.778176                | -3.919065 | 0.309986  |
| 28            | 1             | 0           | 6.006083                | -1.740431 | -0.013766 |
| 29            | 1             | 0           | 3.582422                | 1.802094  | 1.479491  |
| 30            | 1             | 0           | 4.924301                | 3.912098  | 1.360971  |
| 31            | 1             | 0           | 7.749257                | 1.783653  | -1.082114 |
| 32            | 1             | 0           | 7.050750                | 3.904028  | 0.025508  |
| 33            | 1             | 0           | 0.605387                | 3.219268  | -0.642198 |
| 34            | 1             | 0           | -0.608221               | 2.386359  | 0.328450  |
| 35            | 1             | 0           | -0.324986               | 1.982667  | -1.419724 |
| 36            | 1             | 0           | 1.892747                | 1.764616  | -2.375317 |
| 37            | 1             | 0           | 3.344279                | 0.913509  | -1.809822 |
| 38            | 1             | 0           | 3.016652                | 2.578090  | -1.281758 |
| 39            | 6             | 0           | -3.311543               | 3.474679  | -0.244606 |
| 40            | 6             | 0           | -4.387662               | 4.268046  | 0.135162  |
| 41            | 6             | 0           | -5.565715               | 3.634057  | 0.518857  |
| 42            | 7             | 0           | -3.357398               | 2.140891  | -0.252701 |
| 43            | 6             | 0           | -5.619232               | 2.246113  | 0.515727  |
| 44            | 6             | 0           | -4.492763               | 1.518312  | 0.129074  |
| 45            | 6             | 0           | -4.456945               | 0.025401  | 0.105246  |
| 46            | 7             | 0           | -3.363169               | -0.462841 | -0.481786 |
| 47            | 6             | 0           | -5.426883               | -0.789266 | 0.663681  |
| 48            | 6             | 0           | -5.223823               | -2.192870 | 0.569314  |

|    |    |   |           |           |           |
|----|----|---|-----------|-----------|-----------|
| 49 | 6  | 0 | -3.113620 | -1.805630 | -0.542716 |
| 50 | 6  | 0 | -4.090247 | -2.696478 | -0.023614 |
| 51 | 6  | 0 | -1.828887 | -2.154407 | -1.076211 |
| 52 | 6  | 0 | -1.357417 | -3.487868 | -1.186260 |
| 53 | 7  | 0 | -1.005464 | -1.104651 | -1.436780 |
| 54 | 6  | 0 | -0.087928 | -3.737557 | -1.651062 |
| 55 | 6  | 0 | 0.216724  | -1.378005 | -1.908364 |
| 56 | 6  | 0 | 0.736032  | -2.656046 | -2.031275 |
| 57 | 28 | 0 | -1.829543 | 0.771616  | -0.955240 |
| 58 | 1  | 0 | -2.364820 | 3.911105  | -0.554961 |
| 59 | 1  | 0 | -4.301195 | 5.348460  | 0.122662  |
| 60 | 1  | 0 | -6.435298 | 4.213542  | 0.812565  |
| 61 | 1  | 0 | -6.529581 | 1.728175  | 0.794347  |
| 62 | 1  | 0 | -6.302229 | -0.389489 | 1.160835  |
| 63 | 1  | 0 | -5.967484 | -2.870827 | 0.976275  |
| 64 | 1  | 0 | -3.941691 | -3.770342 | -0.080722 |
| 65 | 1  | 0 | -2.002550 | -4.311738 | -0.897182 |
| 66 | 1  | 0 | 0.270467  | -4.759881 | -1.735353 |
| 67 | 1  | 0 | 0.815274  | -0.509782 | -2.180972 |
| 68 | 1  | 0 | 1.737793  | -2.804954 | -2.417355 |

-----

Zero-point correction= 0.535362  
(Hartree/Particle)  
Thermal correction to Energy= 0.570495  
Thermal correction to Enthalpy= 0.571439  
Thermal correction to Gibbs Free Energy= 0.466304  
Sum of electronic and zero-point Energies= -1902.243537  
Sum of electronic and thermal Energies= -1902.208403  
Sum of electronic and thermal Enthalpies= -1902.207459  
Sum of electronic and thermal Free Energies= -1902.312595

### VIs

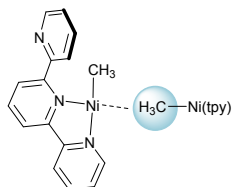

-----

| Center Number | Atomic Number | Atomic Type | Coordinates (Angstroms) |           |           |
|---------------|---------------|-------------|-------------------------|-----------|-----------|
|               |               |             | X                       | Y         | Z         |
| 1             | 6             | 0           | -0.101826               | -2.218400 | -0.930950 |
| 2             | 6             | 0           | 0.182241                | -3.521648 | -1.324791 |
| 3             | 6             | 0           | -0.881967               | -4.424909 | -1.418222 |
| 4             | 7             | 0           | -1.329515               | -1.803254 | -0.619695 |
| 5             | 6             | 0           | -2.167170               | -3.992798 | -1.129491 |
| 6             | 6             | 0           | -2.376244               | -2.668574 | -0.731447 |
| 7             | 6             | 0           | -3.687725               | -2.085579 | -0.451931 |
| 8             | 7             | 0           | -3.688046               | -0.752244 | -0.176054 |
| 9             | 6             | 0           | -4.885745               | -2.808788 | -0.503714 |
| 10            | 6             | 0           | -6.085284               | -2.145483 | -0.317777 |
| 11            | 6             | 0           | -4.860864               | -0.095126 | -0.108162 |
| 12            | 6             | 0           | -6.080833               | -0.759660 | -0.149308 |
| 13            | 6             | 0           | -4.844635               | 1.392481  | -0.093649 |
| 14            | 6             | 0           | -3.849082               | 2.098201  | -0.775180 |
| 15            | 7             | 0           | -5.861604               | 1.990245  | 0.535058  |
| 16            | 6             | 0           | -3.895280               | 3.485999  | -0.763627 |
| 17            | 6             | 0           | -5.887978               | 3.321236  | 0.544328  |
| 18            | 6             | 0           | -4.929092               | 4.116572  | -0.079331 |
| 19            | 28            | 0           | -1.877183               | -0.164601 | 0.480477  |



|    |    |   |           |           |           |
|----|----|---|-----------|-----------|-----------|
| 20 | 6  | 0 | 0.258065  | 0.396783  | 0.907603  |
| 21 | 6  | 0 | -2.498224 | 1.033731  | 1.856880  |
| 22 | 1  | 0 | 0.695567  | -1.486302 | -0.829364 |
| 23 | 1  | 0 | 1.204481  | -3.802808 | -1.547773 |
| 24 | 1  | 0 | -0.709077 | -5.454061 | -1.715289 |
| 25 | 1  | 0 | -3.001476 | -4.679465 | -1.214895 |
| 26 | 1  | 0 | -4.872305 | -3.876066 | -0.688411 |
| 27 | 1  | 0 | -7.021807 | -2.693058 | -0.342430 |
| 28 | 1  | 0 | -6.992207 | -0.181059 | -0.066735 |
| 29 | 1  | 0 | -3.063009 | 1.562376  | -1.296988 |
| 30 | 1  | 0 | -3.136800 | 4.064172  | -1.282491 |
| 31 | 1  | 0 | -6.720057 | 3.777087  | 1.075703  |
| 32 | 1  | 0 | -5.002723 | 5.197602  | -0.035774 |
| 33 | 1  | 0 | 0.031065  | 1.188385  | 1.617211  |
| 34 | 1  | 0 | -0.079590 | 0.628915  | -0.116963 |
| 35 | 1  | 0 | 0.006356  | -0.593081 | 1.301470  |
| 36 | 1  | 0 | -1.939831 | 0.784049  | 2.766526  |
| 37 | 1  | 0 | -3.566787 | 0.912590  | 2.061324  |
| 38 | 1  | 0 | -2.301945 | 2.082800  | 1.605467  |
| 39 | 6  | 0 | 1.384081  | 3.247767  | 0.122598  |
| 40 | 6  | 0 | 1.572874  | 4.574689  | -0.205657 |
| 41 | 6  | 0 | 2.845974  | 4.990006  | -0.630593 |
| 42 | 7  | 0 | 2.360697  | 2.323429  | 0.055008  |
| 43 | 6  | 0 | 3.858515  | 4.054492  | -0.707765 |
| 44 | 6  | 0 | 3.603341  | 2.721599  | -0.367382 |
| 45 | 6  | 0 | 4.575760  | 1.641662  | -0.418502 |
| 46 | 7  | 0 | 4.059900  | 0.471008  | 0.044116  |
| 47 | 6  | 0 | 5.863518  | 1.715696  | -0.895505 |
| 48 | 6  | 0 | 6.640793  | 0.528114  | -0.923622 |
| 49 | 6  | 0 | 4.773895  | -0.713014 | -0.023000 |
| 50 | 6  | 0 | 6.091504  | -0.670184 | -0.505418 |
| 51 | 6  | 0 | 4.020313  | -1.823424 | 0.406511  |
| 52 | 6  | 0 | 4.476822  | -3.161566 | 0.470786  |
| 53 | 7  | 0 | 2.705072  | -1.506938 | 0.787677  |
| 54 | 6  | 0 | 3.655584  | -4.162256 | 0.917130  |
| 55 | 6  | 0 | 1.945605  | -2.511247 | 1.273605  |
| 56 | 6  | 0 | 2.339524  | -3.826063 | 1.341748  |
| 57 | 28 | 0 | 2.256765  | 0.391278  | 0.527670  |
| 58 | 1  | 0 | 0.416488  | 2.889985  | 0.458168  |
| 59 | 1  | 0 | 0.747392  | 5.272248  | -0.125995 |
| 60 | 1  | 0 | 3.032855  | 6.026439  | -0.891309 |
| 61 | 1  | 0 | 4.855119  | 4.338847  | -1.027169 |
| 62 | 1  | 0 | 6.273952  | 2.650977  | -1.259708 |
| 63 | 1  | 0 | 7.658869  | 0.559668  | -1.295099 |
| 64 | 1  | 0 | 6.677485  | -1.583059 | -0.555877 |
| 65 | 1  | 0 | 5.494225  | -3.379595 | 0.159858  |
| 66 | 1  | 0 | 4.007098  | -5.187755 | 0.962026  |
| 67 | 1  | 0 | 0.954230  | -2.233866 | 1.617518  |
| 68 | 1  | 0 | 1.659861  | -4.570495 | 1.739117  |

---

Zero-point correction= 0.536068  
(Hartree/Particle)  
Thermal correction to Energy= 0.570494  
Thermal correction to Enthalpy= 0.571439  
Thermal correction to Gibbs Free Energy= 0.469071  
Sum of electronic and zero-point Energies= -1902.166276  
Sum of electronic and thermal Energies= -1902.131850  
Sum of electronic and thermal Enthalpies= -1902.130906  
Sum of electronic and thermal Free Energies= -1902.233274

Vit

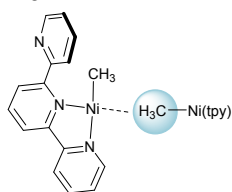

| Center Number | Atomic Number | Atomic Type | Coordinates (Angstroms) |           |           |
|---------------|---------------|-------------|-------------------------|-----------|-----------|
|               |               |             | X                       | Y         | Z         |
| 1             | 6             | 0           | -1.341010               | -1.430532 | 2.258561  |
| 2             | 6             | 0           | -2.583186               | -0.953049 | 2.667708  |
| 3             | 6             | 0           | -2.782089               | 0.423364  | 2.686414  |
| 4             | 7             | 0           | -0.351270               | -0.622991 | 1.885291  |
| 5             | 6             | 0           | -1.743218               | 1.267180  | 2.308677  |
| 6             | 6             | 0           | -0.529537               | 0.705377  | 1.909586  |
| 7             | 6             | 0           | 0.649024                | 1.510246  | 1.484964  |
| 8             | 7             | 0           | 1.671925                | 0.811354  | 0.963297  |
| 9             | 6             | 0           | 0.700778                | 2.893035  | 1.640674  |
| 10            | 6             | 0           | 1.845756                | 3.570056  | 1.232029  |
| 11            | 6             | 0           | 2.771505                | 1.462322  | 0.563663  |
| 12            | 6             | 0           | 2.896449                | 2.850676  | 0.687432  |
| 13            | 6             | 0           | 3.898972                | 0.667370  | 0.007825  |
| 14            | 6             | 0           | 3.667548                | -0.505245 | -0.713467 |
| 15            | 7             | 0           | 5.120986                | 1.162717  | 0.238684  |
| 16            | 6             | 0           | 4.768070                | -1.221377 | -1.169460 |
| 17            | 6             | 0           | 6.162786                | 0.466988  | -0.210972 |
| 18            | 6             | 0           | 6.043131                | -0.735617 | -0.905297 |
| 19            | 28            | 0           | 1.489364                | -1.328577 | 1.128035  |
| 20            | 6             | 0           | 1.188062                | 0.375056  | -2.650703 |
| 21            | 6             | 0           | 2.197538                | -3.257197 | 1.172266  |
| 22            | 1             | 0           | -1.115074               | -2.493508 | 2.213189  |
| 23            | 1             | 0           | -3.368278               | -1.643055 | 2.956589  |
| 24            | 1             | 0           | -3.738322               | 0.839104  | 2.989322  |
| 25            | 1             | 0           | -1.890731               | 2.341159  | 2.299490  |
| 26            | 1             | 0           | -0.129129               | 3.435417  | 2.078630  |
| 27            | 1             | 0           | 1.913505                | 4.647813  | 1.344947  |
| 28            | 1             | 0           | 3.819200                | 3.319328  | 0.367869  |
| 29            | 1             | 0           | 2.650541                | -0.805549 | -0.947867 |
| 30            | 1             | 0           | 4.624748                | -2.140977 | -1.728098 |
| 31            | 1             | 0           | 7.143507                | 0.890455  | -0.005701 |
| 32            | 1             | 0           | 6.930148                | -1.264059 | -1.237960 |
| 33            | 1             | 0           | 0.771006                | 0.864542  | -3.549628 |
| 34            | 1             | 0           | 1.936036                | 1.082770  | -2.248091 |
| 35            | 1             | 0           | 1.769813                | -0.481105 | -3.030148 |
| 36            | 1             | 0           | 1.426686                | -3.992798 | 1.452871  |
| 37            | 1             | 0           | 3.009209                | -3.358386 | 1.907858  |
| 38            | 1             | 0           | 2.610717                | -3.595222 | 0.207169  |
| 39            | 6             | 0           | -0.431137               | 3.138573  | -1.381467 |
| 40            | 6             | 0           | -0.934565               | 4.434327  | -1.289263 |
| 41            | 6             | 0           | -2.271198               | 4.597784  | -0.939998 |
| 42            | 7             | 0           | -1.179691               | 2.065593  | -1.142163 |
| 43            | 6             | 0           | -3.058151               | 3.474225  | -0.707438 |
| 44            | 6             | 0           | -2.472360               | 2.212610  | -0.823721 |
| 45            | 6             | 0           | -3.211594               | 0.933328  | -0.619562 |
| 46            | 7             | 0           | -2.465631               | -0.169675 | -0.753665 |
| 47            | 6             | 0           | -4.572483               | 0.858955  | -0.320168 |
| 48            | 6             | 0           | -5.150729               | -0.396991 | -0.172519 |
| 49            | 6             | 0           | -3.010082               | -1.382543 | -0.602234 |
| 50            | 6             | 0           | -4.368289               | -1.536161 | -0.316193 |

|    |    |   |           |           |           |
|----|----|---|-----------|-----------|-----------|
| 51 | 6  | 0 | -2.054992 | -2.518093 | -0.742244 |
| 52 | 6  | 0 | -2.386397 | -3.836805 | -0.436466 |
| 53 | 7  | 0 | -0.824682 | -2.172488 | -1.147435 |
| 54 | 6  | 0 | -1.401562 | -4.815317 | -0.555129 |
| 55 | 6  | 0 | 0.113671  | -3.107406 | -1.257896 |
| 56 | 6  | 0 | -0.128977 | -4.451609 | -0.972542 |
| 57 | 28 | 0 | -0.455450 | -0.013655 | -1.431649 |
| 58 | 1  | 0 | 0.601772  | 2.927426  | -1.650480 |
| 59 | 1  | 0 | -0.293740 | 5.286243  | -1.488061 |
| 60 | 1  | 0 | -2.703453 | 5.590109  | -0.856681 |
| 61 | 1  | 0 | -4.104821 | 3.587033  | -0.447758 |
| 62 | 1  | 0 | -5.174275 | 1.754341  | -0.216294 |
| 63 | 1  | 0 | -6.209923 | -0.486948 | 0.046770  |
| 64 | 1  | 0 | -4.810611 | -2.520383 | -0.215980 |
| 65 | 1  | 0 | -3.381818 | -4.102761 | -0.098400 |
| 66 | 1  | 0 | -1.630005 | -5.848744 | -0.314042 |
| 67 | 1  | 0 | 1.088500  | -2.756968 | -1.582500 |
| 68 | 1  | 0 | 0.673304  | -5.175543 | -1.052221 |

-----

Zero-point correction= 0.533165  
(Hartree/Particle)  
Thermal correction to Energy= 0.569914  
Thermal correction to Enthalpy= 0.570858  
Thermal correction to Gibbs Free Energy= 0.460923  
Sum of electronic and zero-point Energies= -1902.251974  
Sum of electronic and thermal Energies= -1902.215226  
Sum of electronic and thermal Enthalpies= -1902.214282  
Sum of electronic and thermal Free Energies= -1902.324216

### TS-2s

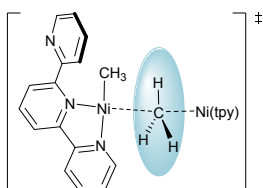

Imaginary frequency =  $-365.5809 \text{ cm}^{-1}$

| Center Number | Atomic Number | Atomic Type | Coordinates (Angstroms) |           |           |
|---------------|---------------|-------------|-------------------------|-----------|-----------|
|               |               |             | X                       | Y         | Z         |
| 1             | 6             | 0           | 0.157999                | -2.286270 | 0.997456  |
| 2             | 6             | 0           | -0.086178               | -3.590578 | 1.415566  |
| 3             | 6             | 0           | 0.994390                | -4.469314 | 1.488266  |
| 4             | 7             | 0           | 1.369902                | -1.849477 | 0.652352  |
| 5             | 6             | 0           | 2.263655                | -4.013922 | 1.156107  |
| 6             | 6             | 0           | 2.429165                | -2.691864 | 0.740703  |
| 7             | 6             | 0           | 3.733067                | -2.087928 | 0.416165  |
| 8             | 7             | 0           | 3.709077                | -0.754712 | 0.171573  |
| 9             | 6             | 0           | 4.931001                | -2.806031 | 0.401816  |
| 10            | 6             | 0           | 6.119440                | -2.127988 | 0.177250  |
| 11            | 6             | 0           | 4.869705                | -0.086462 | 0.058429  |
| 12            | 6             | 0           | 6.097260                | -0.743697 | 0.034554  |
| 13            | 6             | 0           | 4.837401                | 1.400767  | 0.052381  |
| 14            | 6             | 0           | 3.835384                | 2.095051  | 0.735358  |
| 15            | 7             | 0           | 5.847821                | 2.008548  | -0.577250 |
| 16            | 6             | 0           | 3.867351                | 3.483367  | 0.723059  |
| 17            | 6             | 0           | 5.861232                | 3.339519  | -0.586360 |
| 18            | 6             | 0           | 4.894213                | 4.124345  | 0.038402  |
| 19            | 28            | 0           | 1.858762                | -0.181254 | -0.468252 |

|    |    |   |           |           |           |
|----|----|---|-----------|-----------|-----------|
| 20 | 6  | 0 | -0.204501 | 0.273037  | -0.836434 |
| 21 | 6  | 0 | 2.431784  | 1.024697  | -1.864063 |
| 22 | 1  | 0 | -0.659267 | -1.574444 | 0.908640  |
| 23 | 1  | 0 | -1.096635 | -3.892748 | 1.663547  |
| 24 | 1  | 0 | 0.851785  | -5.497310 | 1.804858  |
| 25 | 1  | 0 | 3.114567  | -4.681281 | 1.225822  |
| 26 | 1  | 0 | 4.933006  | -3.877529 | 0.560170  |
| 27 | 1  | 0 | 7.059676  | -2.669029 | 0.148652  |
| 28 | 1  | 0 | 6.999515  | -0.156673 | -0.083242 |
| 29 | 1  | 0 | 3.053967  | 1.552043  | 1.256252  |
| 30 | 1  | 0 | 3.102143  | 4.053614  | 1.240766  |
| 31 | 1  | 0 | 6.688090  | 3.803967  | -1.118214 |
| 32 | 1  | 0 | 4.956267  | 5.206071  | -0.005327 |
| 33 | 1  | 0 | -0.061965 | 1.097428  | -1.522601 |
| 34 | 1  | 0 | -0.059894 | 0.453441  | 0.232230  |
| 35 | 1  | 0 | -0.146693 | -0.728636 | -1.248716 |
| 36 | 1  | 0 | 1.870352  | 0.771784  | -2.770591 |
| 37 | 1  | 0 | 3.501138  | 0.917463  | -2.079633 |
| 38 | 1  | 0 | 2.229002  | 2.073913  | -1.616777 |
| 39 | 6  | 0 | -1.243523 | 3.143066  | 0.057394  |
| 40 | 6  | 0 | -1.380037 | 4.481479  | 0.355958  |
| 41 | 6  | 0 | -2.663883 | 4.979357  | 0.651050  |
| 42 | 7  | 0 | -2.275179 | 2.275928  | 0.046352  |
| 43 | 6  | 0 | -3.732197 | 4.109568  | 0.642832  |
| 44 | 6  | 0 | -3.527372 | 2.751194  | 0.354067  |
| 45 | 6  | 0 | -4.552745 | 1.733645  | 0.331909  |
| 46 | 7  | 0 | -4.107309 | 0.556139  | -0.216712 |
| 47 | 6  | 0 | -5.829673 | 1.849007  | 0.831870  |
| 48 | 6  | 0 | -6.662286 | 0.704958  | 0.854305  |
| 49 | 6  | 0 | -4.850974 | -0.607080 | -0.058366 |
| 50 | 6  | 0 | -6.153119 | -0.517942 | 0.444405  |
| 51 | 6  | 0 | -4.134371 | -1.769014 | -0.416876 |
| 52 | 6  | 0 | -4.680729 | -3.070173 | -0.537498 |
| 53 | 7  | 0 | -2.779484 | -1.542998 | -0.688560 |
| 54 | 6  | 0 | -3.897920 | -4.125083 | -0.921284 |
| 55 | 6  | 0 | -2.057081 | -2.597454 | -1.130396 |
| 56 | 6  | 0 | -2.532473 | -3.881084 | -1.236622 |
| 57 | 28 | 0 | -2.273303 | 0.362477  | -0.501598 |
| 58 | 1  | 0 | -0.270154 | 2.725791  | -0.183156 |
| 59 | 1  | 0 | -0.509174 | 5.126418  | 0.353362  |
| 60 | 1  | 0 | -2.811622 | 6.030620  | 0.875531  |
| 61 | 1  | 0 | -4.737287 | 4.459933  | 0.852005  |
| 62 | 1  | 0 | -6.180369 | 2.791088  | 1.240431  |
| 63 | 1  | 0 | -7.667138 | 0.773475  | 1.254955  |
| 64 | 1  | 0 | -6.753942 | -1.417309 | 0.543815  |
| 65 | 1  | 0 | -5.736605 | -3.212839 | -0.329185 |
| 66 | 1  | 0 | -4.317400 | -5.121737 | -1.011252 |
| 67 | 1  | 0 | -1.026239 | -2.390741 | -1.399978 |
| 68 | 1  | 0 | -1.875696 | -4.672064 | -1.579263 |

---

Zero-point correction= 0.534947  
(Hartree/Particle)  
Thermal correction to Energy= 0.569100  
Thermal correction to Enthalpy= 0.570044  
Thermal correction to Gibbs Free Energy= 0.468627  
Sum of electronic and zero-point Energies= -1902.166791  
Sum of electronic and thermal Energies= -1902.132638  
Sum of electronic and thermal Enthalpies= -1902.131694  
Sum of electronic and thermal Free Energies= -1902.233111

**TS-2t**

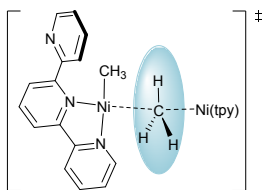

Imaginary frequency = -467.3528 cm<sup>-1</sup>

| Center Number | Atomic Number | Atomic Type | Coordinates (Angstroms) |           |           |
|---------------|---------------|-------------|-------------------------|-----------|-----------|
|               |               |             | X                       | Y         | Z         |
| 1             | 6             | 0           | 0.473638                | -2.113597 | 1.334751  |
| 2             | 6             | 0           | 0.281165                | -3.401273 | 1.794252  |
| 3             | 6             | 0           | 1.385122                | -4.289825 | 1.740619  |
| 4             | 7             | 0           | 1.626245                | -1.654484 | 0.829527  |
| 5             | 6             | 0           | 2.585869                | -3.839491 | 1.256547  |
| 6             | 6             | 0           | 2.720645                | -2.499130 | 0.805702  |
| 7             | 6             | 0           | 3.937327                | -1.921201 | 0.334921  |
| 8             | 7             | 0           | 3.908051                | -0.562936 | 0.100258  |
| 9             | 6             | 0           | 5.129148                | -2.657029 | 0.109583  |
| 10            | 6             | 0           | 6.270783                | -2.007593 | -0.282084 |
| 11            | 6             | 0           | 5.068791                | 0.067555  | -0.190131 |
| 12            | 6             | 0           | 6.257649                | -0.600618 | -0.405236 |
| 13            | 6             | 0           | 5.074493                | 1.556005  | -0.159203 |
| 14            | 6             | 0           | 4.232181                | 2.245545  | 0.721040  |
| 15            | 7             | 0           | 5.959852                | 2.179869  | -0.944518 |
| 16            | 6             | 0           | 4.293720                | 3.630753  | 0.757151  |
| 17            | 6             | 0           | 6.001228                | 3.510156  | -0.904288 |
| 18            | 6             | 0           | 5.190170                | 4.286589  | -0.080832 |
| 19            | 28            | 0           | 2.011256                | 0.088021  | -0.214435 |
| 20            | 6             | 0           | -0.067857               | 0.695214  | -0.216807 |
| 21            | 6             | 0           | 2.400665                | 1.322870  | -1.695069 |
| 22            | 1             | 0           | -1.352959               | -1.403300 | 1.337395  |
| 23            | 1             | 0           | -0.682750               | -3.706696 | 2.184630  |
| 24            | 1             | 0           | 1.288701                | -5.311103 | 2.097029  |
| 25            | 1             | 0           | 3.446115                | -4.499762 | 1.241159  |
| 26            | 1             | 0           | 5.127981                | -3.734395 | 0.233217  |
| 27            | 1             | 0           | 7.183421                | -2.564893 | -0.469670 |
| 28            | 1             | 0           | 7.147422                | -0.031605 | -0.641466 |
| 29            | 1             | 0           | 3.550798                | 1.688738  | 1.355308  |
| 30            | 1             | 0           | 3.652518                | 4.191994  | 1.430816  |
| 31            | 1             | 0           | 6.724535                | 3.982221  | -1.566354 |
| 32            | 1             | 0           | 5.269619                | 5.368333  | -0.093758 |
| 33            | 1             | 0           | 0.084777                | 1.666821  | -0.669500 |
| 34            | 1             | 0           | -0.033460               | 0.601564  | 0.866878  |
| 35            | 1             | 0           | -0.021858               | -0.181806 | -0.862385 |
| 36            | 1             | 0           | 1.641778                | 1.177454  | -2.475982 |
| 37            | 1             | 0           | 3.387752                | 1.132273  | -2.133324 |
| 38            | 1             | 0           | 2.361319                | 2.373307  | -1.377718 |
| 39            | 6             | 0           | -2.274027               | 3.504244  | 0.390629  |
| 40            | 6             | 0           | -2.828669               | 4.732515  | 0.742620  |
| 41            | 6             | 0           | -4.206815               | 4.811402  | 0.899297  |
| 42            | 7             | 0           | -3.011307               | 2.414598  | 0.194271  |
| 43            | 6             | 0           | -4.979737               | 3.672295  | 0.697658  |
| 44            | 6             | 0           | -4.343637               | 2.484709  | 0.340100  |
| 45            | 6             | 0           | -5.075855               | 1.206311  | 0.098850  |
| 46            | 7             | 0           | -4.292911               | 0.148324  | -0.130336 |
| 47            | 6             | 0           | -6.465439               | 1.087141  | 0.098349  |
| 48            | 6             | 0           | -7.021155               | -0.163635 | -0.149868 |

|    |    |   |           |           |           |
|----|----|---|-----------|-----------|-----------|
| 49 | 6  | 0 | -4.811668 | -1.060137 | -0.363409 |
| 50 | 6  | 0 | -6.194524 | -1.255407 | -0.384242 |
| 51 | 6  | 0 | -3.810885 | -2.138853 | -0.602171 |
| 52 | 6  | 0 | -4.159222 | -3.484805 | -0.666635 |
| 53 | 7  | 0 | -2.537204 | -1.726140 | -0.743313 |
| 54 | 6  | 0 | -3.159115 | -4.429551 | -0.886456 |
| 55 | 6  | 0 | -1.588137 | -2.632636 | -0.965586 |
| 56 | 6  | 0 | -1.848860 | -4.000702 | -1.040795 |
| 57 | 28 | 0 | -2.225151 | 0.416436  | -0.260776 |
| 58 | 1  | 0 | -1.203278 | 3.373083  | 0.259571  |
| 59 | 1  | 0 | -2.191247 | 5.596682  | 0.890991  |
| 60 | 1  | 0 | -4.679727 | 5.747580  | 1.178413  |
| 61 | 1  | 0 | -6.055167 | 3.714613  | 0.825555  |
| 62 | 1  | 0 | -7.105142 | 1.943684  | 0.273844  |
| 63 | 1  | 0 | -8.099294 | -0.285167 | -0.167177 |
| 64 | 1  | 0 | -6.621113 | -2.229086 | -0.593256 |
| 65 | 1  | 0 | -5.186524 | -3.802400 | -0.529712 |
| 66 | 1  | 0 | -3.406749 | -5.485319 | -0.928042 |
| 67 | 1  | 0 | -0.576302 | -2.252991 | -1.076235 |
| 68 | 1  | 0 | -1.033153 | -4.696180 | -1.201098 |

```

-----
Zero-point correction=                0.533521
(Hartree/Particle)
Thermal correction to Energy=         0.568942
Thermal correction to Enthalpy=       0.569886
Thermal correction to Gibbs Free Energy= 0.462345
Sum of electronic and zero-point Energies= -1902.216460
Sum of electronic and thermal Energies= -1902.181039
Sum of electronic and thermal Enthalpies= -1902.180095
Sum of electronic and thermal Free Energies= -1902.287636

```

### Ni(tpy)Me

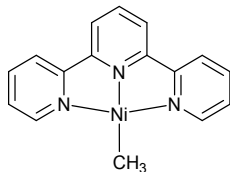

| Center Number | Atomic Number | Atomic Type | Coordinates (Angstroms) |           |           |
|---------------|---------------|-------------|-------------------------|-----------|-----------|
|               |               |             | X                       | Y         | Z         |
| 1             | 1             | 0           | 0.312454                | 0.062145  | 5.703468  |
| 2             | 6             | 0           | 0.018215                | 0.057040  | 4.658819  |
| 3             | 7             | 0           | -0.744774               | 0.028314  | 1.979213  |
| 4             | 6             | 0           | 0.975693                | -0.006913 | 3.667109  |
| 5             | 6             | 0           | -1.335867               | 0.118943  | 4.299209  |
| 6             | 6             | 0           | -1.661342               | 0.097193  | 2.955488  |
| 7             | 6             | 0           | 0.581598                | -0.009049 | 2.320974  |
| 8             | 1             | 0           | 2.030349                | -0.052761 | 3.915968  |
| 9             | 1             | 0           | -2.118700               | 0.182246  | 5.045414  |
| 10            | 1             | 0           | -2.692477               | 0.138408  | 2.622285  |
| 11            | 6             | 0           | 1.493719                | -0.034774 | 1.189194  |
| 12            | 6             | 0           | 2.879839                | -0.007420 | -1.213722 |
| 13            | 6             | 0           | 2.879839                | -0.007420 | 1.213722  |
| 14            | 7             | 0           | 0.832282                | -0.070521 | -0.000000 |
| 15            | 6             | 0           | 1.493719                | -0.034774 | -1.189194 |
| 16            | 6             | 0           | 3.580286                | -0.002118 | -0.000000 |
| 17            | 1             | 0           | 3.419298                | 0.018811  | 2.154860  |
| 18            | 1             | 0           | 4.663841                | 0.023117  | -0.000000 |
| 19            | 1             | 0           | 3.419298                | 0.018811  | -2.154860 |

|                                              |    |   |           |             |           |
|----------------------------------------------|----|---|-----------|-------------|-----------|
| 20                                           | 6  | 0 | 0.581598  | -0.009049   | -2.320974 |
| 21                                           | 6  | 0 | -1.335867 | 0.118943    | -4.299209 |
| 22                                           | 6  | 0 | 0.975693  | -0.006913   | -3.667109 |
| 23                                           | 7  | 0 | -0.744774 | 0.028314    | -1.979213 |
| 24                                           | 6  | 0 | -1.661342 | 0.097193    | -2.955488 |
| 25                                           | 6  | 0 | 0.018215  | 0.057040    | -4.658819 |
| 26                                           | 1  | 0 | 2.030349  | -0.052761   | -3.915968 |
| 27                                           | 1  | 0 | -2.692477 | 0.138408    | -2.622285 |
| 28                                           | 1  | 0 | 0.312454  | 0.062145    | -5.703468 |
| 29                                           | 1  | 0 | -2.118700 | 0.182246    | -5.045414 |
| 30                                           | 28 | 0 | -1.084204 | -0.050987   | 0.000000  |
| 31                                           | 6  | 0 | -3.033058 | -0.185607   | 0.000000  |
| 32                                           | 1  | 0 | -3.406540 | -0.730005   | -0.876522 |
| 33                                           | 1  | 0 | -3.499649 | 0.810185    | 0.000000  |
| 34                                           | 1  | 0 | -3.406540 | -0.730005   | 0.876522  |
| -----                                        |    |   |           |             |           |
| Zero-point correction=                       |    |   |           | 0.264657    |           |
| (Hartree/Particle)                           |    |   |           |             |           |
| Thermal correction to Energy=                |    |   |           | 0.280213    |           |
| Thermal correction to Enthalpy=              |    |   |           | 0.281157    |           |
| Thermal correction to Gibbs Free Energy=     |    |   |           | 0.221558    |           |
| Sum of electronic and zero-point Energies=   |    |   |           | -951.112169 |           |
| Sum of electronic and thermal Energies=      |    |   |           | -951.096613 |           |
| Sum of electronic and thermal Enthalpies=    |    |   |           | -951.095669 |           |
| Sum of electronic and thermal Free Energies= |    |   |           | -951.155268 |           |

### 1.3. Atomic coordinates and energies for the stationary points in THF

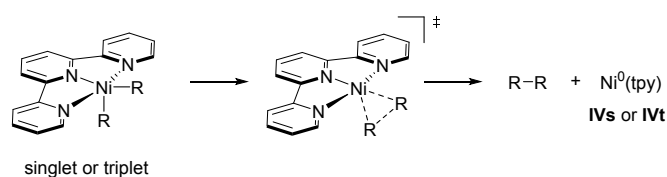

|              | <b>I-bic</b><br>R = CH <sub>3</sub><br>singlet | <b>It</b><br>R = CH <sub>3</sub><br>triplet | <b>IIIs</b><br><br>singlet | <b>IIIt</b><br><br>triplet | <b>IIIIs</b><br>R = CF <sub>3</sub><br>singlet | <b>IIIIt</b><br>R = CF <sub>3</sub><br>triplet |
|--------------|------------------------------------------------|---------------------------------------------|----------------------------|----------------------------|------------------------------------------------|------------------------------------------------|
| $\Delta G_a$ | 40.6                                           | 17.1                                        | 52.2                       | 24.4                       | -                                              | 58.6                                           |
| $\Delta G$   | -8.9                                           | -34.1                                       | 24.3                       | -1,7                       | 22.7                                           | -2.8                                           |

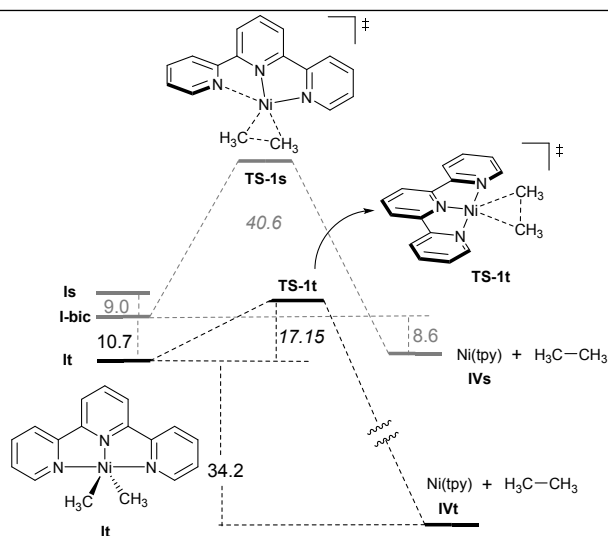

**Is**

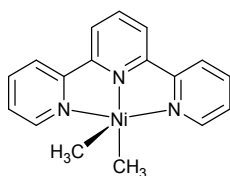

| Center Number | Atomic Number | Atomic Type | Coordinates (Angstroms) |           |           |
|---------------|---------------|-------------|-------------------------|-----------|-----------|
|               |               |             | X                       | Y         | Z         |
| 1             | 1             | 0           | 0.525823                | 0.516685  | -5.690459 |
| 2             | 6             | 0           | 0.220257                | 0.165611  | -4.710381 |
| 3             | 7             | 0           | -0.564984               | -0.714593 | -2.186103 |
| 4             | 6             | 0           | 1.078782                | 0.287485  | -3.622817 |
| 5             | 6             | 0           | -1.035111               | -0.400172 | -4.516579 |
| 6             | 6             | 0           | -1.381435               | -0.820223 | -3.234004 |
| 7             | 6             | 0           | 0.647258                | -0.167321 | -2.377169 |
| 8             | 1             | 0           | 2.054066                | 0.748150  | -3.735391 |
| 9             | 1             | 0           | -1.737529               | -0.512551 | -5.334517 |
| 10            | 1             | 0           | -2.355835               | -1.258422 | -3.034766 |
| 11            | 6             | 0           | 1.495647                | -0.074597 | -1.160447 |
| 12            | 6             | 0           | 2.890036                | -0.072659 | 1.200998  |
| 13            | 6             | 0           | 2.890036                | -0.072659 | -1.200998 |
| 14            | 7             | 0           | 0.829048                | -0.041311 | 0.000000  |



|    |    |   |           |           |           |
|----|----|---|-----------|-----------|-----------|
| 15 | 6  | 0 | 1.495647  | -0.074597 | 1.160447  |
| 16 | 6  | 0 | 3.590143  | -0.055885 | 0.000000  |
| 17 | 1  | 0 | 3.414404  | -0.118518 | -2.148548 |
| 18 | 1  | 0 | 4.674836  | -0.066869 | 0.000000  |
| 19 | 1  | 0 | 3.414404  | -0.118518 | 2.148548  |
| 20 | 6  | 0 | 0.647258  | -0.167321 | 2.377169  |
| 21 | 6  | 0 | -1.035111 | -0.400172 | 4.516579  |
| 22 | 6  | 0 | 1.078782  | 0.287485  | 3.622817  |
| 23 | 7  | 0 | -0.564984 | -0.714593 | 2.186103  |
| 24 | 6  | 0 | -1.381435 | -0.820223 | 3.234004  |
| 25 | 6  | 0 | 0.220257  | 0.165611  | 4.710381  |
| 26 | 1  | 0 | 2.054066  | 0.748150  | 3.735391  |
| 27 | 1  | 0 | -2.355835 | -1.258422 | 3.034766  |
| 28 | 1  | 0 | 0.525823  | 0.516685  | 5.690459  |
| 29 | 1  | 0 | -1.737529 | -0.512551 | 5.334517  |
| 30 | 28 | 0 | -1.222333 | 0.147427  | -0.000000 |
| 31 | 6  | 0 | -3.154895 | 0.080261  | -0.000000 |
| 32 | 1  | 0 | -3.607348 | 0.543422  | 0.887300  |
| 33 | 1  | 0 | -3.437994 | -0.989463 | -0.000000 |
| 34 | 1  | 0 | -3.607348 | 0.543422  | -0.887300 |
| 35 | 6  | 0 | -1.230004 | 2.116242  | -0.000000 |
| 36 | 1  | 0 | -0.206599 | 2.520603  | -0.000000 |
| 37 | 1  | 0 | -1.751155 | 2.501266  | 0.885979  |
| 38 | 1  | 0 | -1.751155 | 2.501266  | -0.885979 |

-----

Zero-point correction= 0.302117  
(Hartree/Particle)  
Thermal correction to Energy= 0.320693  
Thermal correction to Enthalpy= 0.321638  
Thermal correction to Gibbs Free Energy= 0.254604  
Sum of electronic and zero-point Energies= -990.918473  
Sum of electronic and thermal Energies= -990.899896  
Sum of electronic and thermal Enthalpies= -990.898952  
Sum of electronic and thermal Free Energies= -990.965986

### I-bic



-----

| Center Number | Atomic Number | Atomic Type | Coordinates (Angstroms) |           |           |
|---------------|---------------|-------------|-------------------------|-----------|-----------|
|               |               |             | X                       | Y         | Z         |
| 1             | 1             | 0           | -5.661911               | 0.179809  | 0.662735  |
| 2             | 6             | 0           | -4.723407               | 0.037522  | 0.136831  |
| 3             | 7             | 0           | -2.298852               | -0.335340 | -1.202160 |
| 4             | 6             | 0           | -3.616045               | 0.818813  | 0.446356  |
| 5             | 6             | 0           | -4.600938               | -0.932092 | -0.852167 |
| 6             | 6             | 0           | -3.370849               | -1.072268 | -1.492638 |
| 7             | 6             | 0           | -2.423707               | 0.586371  | -0.241046 |
| 8             | 1             | 0           | -3.663260               | 1.572608  | 1.225720  |
| 9             | 1             | 0           | -5.436455               | -1.565403 | -1.128258 |
| 10            | 1             | 0           | -3.241953               | -1.812675 | -2.278012 |
| 11            | 6             | 0           | -1.209154               | 1.401919  | 0.036688  |
| 12            | 6             | 0           | 1.085573                | 2.886925  | 0.250930  |
| 13            | 6             | 0           | -1.306621               | 2.785548  | 0.194061  |
| 14            | 7             | 0           | -0.025548               | 0.775283  | 0.045201  |
| 15            | 6             | 0           | 1.104208                | 1.501919  | 0.089617  |

-----

|    |    |   |           |           |           |
|----|----|---|-----------|-----------|-----------|
| 16 | 6  | 0 | -0.142842 | 3.530286  | 0.330354  |
| 17 | 1  | 0 | -2.278931 | 3.264952  | 0.174379  |
| 18 | 1  | 0 | -0.189310 | 4.606433  | 0.458253  |
| 19 | 1  | 0 | 2.004093  | 3.457282  | 0.306829  |
| 20 | 6  | 0 | 2.357949  | 0.725085  | -0.109029 |
| 21 | 6  | 0 | 4.545060  | -0.848615 | -0.610290 |
| 22 | 6  | 0 | 3.615268  | 1.319961  | -0.193997 |
| 23 | 7  | 0 | 2.192104  | -0.603279 | -0.254905 |
| 24 | 6  | 0 | 3.259166  | -1.366761 | -0.495276 |
| 25 | 6  | 0 | 4.723119  | 0.519656  | -0.449193 |
| 26 | 1  | 0 | 3.736398  | 2.389081  | -0.072099 |
| 27 | 1  | 0 | 3.068012  | -2.430149 | -0.588734 |
| 28 | 1  | 0 | 5.709969  | 0.963699  | -0.524768 |
| 29 | 1  | 0 | 5.378825  | -1.509301 | -0.816500 |
| 30 | 28 | 0 | 0.338283  | -1.256031 | 0.396110  |
| 31 | 6  | 0 | 0.865786  | -3.127716 | 0.526562  |
| 32 | 1  | 0 | 1.697986  | -3.246506 | 1.238420  |
| 33 | 1  | 0 | 1.226713  | -3.468039 | -0.458925 |
| 34 | 1  | 0 | 0.063488  | -3.804996 | 0.837959  |
| 35 | 6  | 0 | -1.220210 | -1.627966 | 1.517709  |
| 36 | 1  | 0 | -1.653778 | -0.701405 | 1.925146  |
| 37 | 1  | 0 | -0.949310 | -2.271958 | 2.364321  |
| 38 | 1  | 0 | -2.010567 | -2.142731 | 0.952668  |

-----

Zero-point correction= 0.304847  
(Hartree/Particle)  
Thermal correction to Energy= 0.323834  
Thermal correction to Enthalpy= 0.324778  
Thermal correction to Gibbs Free Energy= 0.257423  
Sum of electronic and zero-point Energies= -990.932977  
Sum of electronic and thermal Energies= -990.913990  
Sum of electronic and thermal Enthalpies= -990.913045  
Sum of electronic and thermal Free Energies= -990.980401

It



-----

| Center Number | Atomic Number | Atomic Type | Coordinates (Angstroms) |           |           |
|---------------|---------------|-------------|-------------------------|-----------|-----------|
|               |               |             | X                       | Y         | Z         |
| 1             | 1             | 0           | 5.759240                | 0.640742  | -0.316175 |
| 2             | 6             | 0           | 4.740849                | 0.268571  | -0.278586 |
| 3             | 7             | 0           | 2.134831                | -0.667579 | -0.188849 |
| 4             | 6             | 0           | 3.675283                | 1.160015  | -0.209282 |
| 5             | 6             | 0           | 4.483199                | -1.097578 | -0.302783 |
| 6             | 6             | 0           | 3.156998                | -1.517894 | -0.255925 |
| 7             | 6             | 0           | 2.376528                | 0.653438  | -0.164508 |
| 8             | 1             | 0           | 3.860271                | 2.227411  | -0.196908 |
| 9             | 1             | 0           | 5.284873                | -1.824711 | -0.358823 |
| 10            | 1             | 0           | 2.890796                | -2.570986 | -0.272520 |
| 11            | 6             | 0           | 1.167629                | 1.523278  | -0.093473 |
| 12            | 6             | 0           | -1.197993               | 2.916617  | 0.031018  |
| 13            | 6             | 0           | 1.210021                | 2.912883  | 0.031232  |
| 14            | 7             | 0           | 0.003004                | 0.873259  | -0.151379 |
| 15            | 6             | 0           | -1.159744               | 1.526954  | -0.093505 |
| 16            | 6             | 0           | 0.007096                | 3.607504  | 0.093178  |

-----

|    |    |   |           |           |           |
|----|----|---|-----------|-----------|-----------|
| 17 | 1  | 0 | 2.150457  | 3.446987  | 0.087853  |
| 18 | 1  | 0 | 0.008786  | 4.687385  | 0.194746  |
| 19 | 1  | 0 | -2.136883 | 3.453518  | 0.087080  |
| 20 | 6  | 0 | -2.371156 | 0.660673  | -0.164824 |
| 21 | 6  | 0 | -4.480928 | -1.086664 | -0.305399 |
| 22 | 6  | 0 | -3.669098 | 1.169597  | -0.205349 |
| 23 | 7  | 0 | -2.132210 | -0.660595 | -0.193596 |
| 24 | 6  | 0 | -3.155387 | -1.509470 | -0.262259 |
| 25 | 6  | 0 | -4.736132 | 0.279899  | -0.275602 |
| 26 | 1  | 0 | -3.852437 | 2.237226  | -0.188574 |
| 27 | 1  | 0 | -2.889997 | -2.562791 | -0.282936 |
| 28 | 1  | 0 | -5.754030 | 0.653764  | -0.309603 |
| 29 | 1  | 0 | -5.284049 | -1.812107 | -0.362542 |
| 30 | 28 | 0 | -0.002890 | -1.269551 | 0.145282  |
| 31 | 6  | 0 | -0.006498 | -0.932298 | 2.203677  |
| 32 | 1  | 0 | -0.888843 | -0.344481 | 2.502605  |
| 33 | 1  | 0 | 0.881540  | -0.356334 | 2.508716  |
| 34 | 1  | 0 | -0.014890 | -1.857642 | 2.797229  |
| 35 | 6  | 0 | -0.021347 | -3.253812 | -0.483157 |
| 36 | 1  | 0 | -0.103202 | -3.369402 | -1.576265 |
| 37 | 1  | 0 | -0.870191 | -3.805230 | -0.050352 |
| 38 | 1  | 0 | 0.884186  | -3.801798 | -0.181389 |

-----

Zero-point correction= 0.301910  
(Hartree/Particle)  
Thermal correction to Energy= 0.322070  
Thermal correction to Enthalpy= 0.323014  
Thermal correction to Gibbs Free Energy= 0.251732  
Sum of electronic and zero-point Energies= -990.947206  
Sum of electronic and thermal Energies= -990.927046  
Sum of electronic and thermal Enthalpies= -990.926102  
Sum of electronic and thermal Free Energies= -990.997384

### TS-1s



Imaginary frequency = -633.4093 cm<sup>-1</sup>

-----

| Center Number | Atomic Number | Atomic Type | Coordinates (Angstroms) |           |           |
|---------------|---------------|-------------|-------------------------|-----------|-----------|
|               |               |             | X                       | Y         | Z         |
| 1             | 1             | 0           | -5.669949               | 0.508379  | 0.352253  |
| 2             | 6             | 0           | -4.647590               | 0.224794  | 0.125688  |
| 3             | 7             | 0           | -2.006554               | -0.526290 | -0.442633 |
| 4             | 6             | 0           | -3.619408               | 1.138922  | 0.252882  |
| 5             | 6             | 0           | -4.341394               | -1.083012 | -0.284547 |
| 6             | 6             | 0           | -3.023824               | -1.405704 | -0.543162 |
| 7             | 6             | 0           | -2.305826               | 0.744411  | -0.043412 |
| 8             | 1             | 0           | -3.812503               | 2.149230  | 0.598901  |
| 9             | 1             | 0           | -5.116816               | -1.830364 | -0.408931 |
| 10            | 1             | 0           | -2.746403               | -2.407182 | -0.863404 |
| 11            | 6             | 0           | -1.142917               | 1.616405  | 0.055546  |
| 12            | 6             | 0           | 1.256371                | 2.968439  | -0.045613 |
| 13            | 6             | 0           | -1.152286               | 3.001820  | -0.068364 |
| 14            | 7             | 0           | 0.021726                | 0.926766  | 0.215374  |

|    |    |   |           |           |           |
|----|----|---|-----------|-----------|-----------|
| 15 | 6  | 0 | 1.206681  | 1.584461  | 0.078480  |
| 16 | 6  | 0 | 0.061702  | 3.690504  | -0.090544 |
| 17 | 1  | 0 | -2.091243 | 3.533605  | -0.184804 |
| 18 | 1  | 0 | 0.077880  | 4.768306  | -0.207465 |
| 19 | 1  | 0 | 2.210987  | 3.475079  | -0.145045 |
| 20 | 6  | 0 | 2.348650  | 0.682666  | -0.005165 |
| 21 | 6  | 0 | 4.354597  | -1.173956 | -0.267659 |
| 22 | 6  | 0 | 3.670732  | 1.056559  | 0.278710  |
| 23 | 7  | 0 | 2.024196  | -0.587287 | -0.388087 |
| 24 | 6  | 0 | 3.029013  | -1.477865 | -0.508266 |
| 25 | 6  | 0 | 4.683881  | 0.126967  | 0.143911  |
| 26 | 1  | 0 | 3.882940  | 2.065691  | 0.616530  |
| 27 | 1  | 0 | 2.737096  | -2.473264 | -0.831566 |
| 28 | 1  | 0 | 5.712484  | 0.395756  | 0.360022  |
| 29 | 1  | 0 | 5.117329  | -1.931992 | -0.404460 |
| 30 | 28 | 0 | 0.002914  | -1.021299 | -0.045943 |
| 31 | 6  | 0 | -0.036067 | -3.002070 | -0.265990 |
| 32 | 1  | 0 | 0.911956  | -3.521568 | -0.128950 |
| 33 | 1  | 0 | -0.114462 | -2.684937 | -1.326753 |
| 34 | 1  | 0 | -0.855571 | -3.697175 | -0.079630 |
| 35 | 6  | 0 | -0.275598 | -2.277125 | 1.590095  |
| 36 | 1  | 0 | 0.226842  | -1.475898 | 2.143437  |
| 37 | 1  | 0 | 0.124601  | -3.229134 | 1.932403  |
| 38 | 1  | 0 | -1.352653 | -2.237787 | 1.755735  |

-----  
 Zero-point correction=  
 (Hartree/Particle)

0.303566

Thermal correction to Energy=

0.322111

Thermal correction to Enthalpy=

0.323055

Thermal correction to Gibbs Free Energy=

0.257013

Sum of electronic and zero-point Energies=

-990.869130

Sum of electronic and thermal Energies=

-990.850585

Sum of electronic and thermal Enthalpies=

-990.849641

Sum of electronic and thermal Free Energies=

-990.915683

### TS-1t

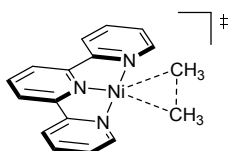

Imaginary frequency = -229.9249 cm<sup>-1</sup>

| Center Number | Atomic Number | Atomic Type | Coordinates (Angstroms) |           |           |
|---------------|---------------|-------------|-------------------------|-----------|-----------|
|               |               |             | X                       | Y         | Z         |
| 1             | 1             | 0           | -5.765823               | 0.712030  | -0.012132 |
| 2             | 6             | 0           | -4.744286               | 0.344817  | -0.012241 |
| 3             | 7             | 0           | -2.122954               | -0.602570 | -0.016517 |
| 4             | 6             | 0           | -3.692217               | 1.231477  | -0.014341 |
| 5             | 6             | 0           | -4.484007               | -1.041706 | -0.008548 |
| 6             | 6             | 0           | -3.163362               | -1.446585 | -0.011160 |
| 7             | 6             | 0           | -2.362908               | 0.745088  | -0.013540 |
| 8             | 1             | 0           | -3.881247               | 2.299340  | -0.015156 |
| 9             | 1             | 0           | -5.285187               | -1.771087 | -0.004054 |
| 10            | 1             | 0           | -2.904191               | -2.503916 | -0.007237 |
| 11            | 6             | 0           | -1.188209               | 1.582185  | -0.005489 |
| 12            | 6             | 0           | 1.219324                | 2.967564  | 0.017178  |
| 13            | 6             | 0           | -1.195555               | 2.989089  | 0.001738  |

|    |    |   |           |           |           |
|----|----|---|-----------|-----------|-----------|
| 14 | 7  | 0 | 0.006453  | 0.903526  | -0.002272 |
| 15 | 6  | 0 | 1.175809  | 1.589502  | 0.007960  |
| 16 | 6  | 0 | -0.002664 | 3.682256  | 0.013675  |
| 17 | 1  | 0 | -2.135034 | 3.531484  | -0.000869 |
| 18 | 1  | 0 | 0.002411  | 4.766568  | 0.020691  |
| 19 | 1  | 0 | 2.160401  | 3.503888  | 0.027837  |
| 20 | 6  | 0 | 2.383125  | 0.727431  | 0.005201  |
| 21 | 6  | 0 | 4.496401  | -1.038098 | -0.015931 |
| 22 | 6  | 0 | 3.691306  | 1.224152  | -0.005007 |
| 23 | 7  | 0 | 2.142895  | -0.599256 | 0.007006  |
| 24 | 6  | 0 | 3.171835  | -1.450593 | -0.005033 |
| 25 | 6  | 0 | 4.754276  | 0.333406  | -0.014732 |
| 26 | 1  | 0 | 3.876130  | 2.291707  | -0.007832 |
| 27 | 1  | 0 | 2.911013  | -2.506268 | -0.007579 |
| 28 | 1  | 0 | 5.774356  | 0.703283  | -0.023173 |
| 29 | 1  | 0 | 5.298386  | -1.766936 | -0.025899 |
| 30 | 28 | 0 | -0.020422 | -1.121799 | 0.000294  |
| 31 | 6  | 0 | 0.031562  | -2.753276 | -1.130825 |
| 32 | 1  | 0 | 0.778844  | -3.530425 | -0.979320 |
| 33 | 1  | 0 | 0.300677  | -2.140982 | -2.004350 |
| 34 | 1  | 0 | -0.959267 | -3.187070 | -1.262982 |
| 35 | 6  | 0 | -0.034669 | -2.716474 | 1.183764  |
| 36 | 1  | 0 | -0.291166 | -2.080154 | 2.043233  |
| 37 | 1  | 0 | 0.957360  | -3.148552 | 1.314020  |
| 38 | 1  | 0 | -0.785191 | -3.495828 | 1.063061  |

-----

Zero-point correction= 0.301963  
(Hartree/Particle)  
Thermal correction to Energy= 0.320896  
Thermal correction to Enthalpy= 0.321840  
Thermal correction to Gibbs Free Energy= 0.253646  
Sum of electronic and zero-point Energies= -990.921736  
Sum of electronic and thermal Energies= -990.902803  
Sum of electronic and thermal Enthalpies= -990.901859  
Sum of electronic and thermal Free Energies= -990.970053

## II5

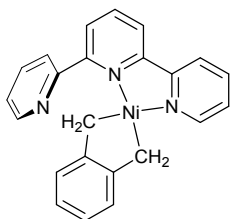

-----

| Center<br>Number | Atomic<br>Number | Atomic<br>Type | Coordinates (Angstroms) |           |           |
|------------------|------------------|----------------|-------------------------|-----------|-----------|
|                  |                  |                | X                       | Y         | Z         |
| 1                | 28               | 0              | -0.083244               | -0.662029 | 0.249843  |
| 2                | 7                | 0              | -1.316256               | 0.987704  | -0.176004 |
| 3                | 6                | 0              | -2.910578               | 2.621030  | -1.757679 |
| 4                | 6                | 0              | -0.944879               | 2.248733  | -0.433688 |
| 5                | 6                | 0              | -2.516820               | 0.560086  | -0.607730 |
| 6                | 6                | 0              | -3.337937               | 1.344261  | -1.415873 |
| 7                | 6                | 0              | -1.711932               | 3.092588  | -1.239516 |
| 8                | 1                | 0              | -4.285755               | 0.968170  | -1.779967 |
| 9                | 1                | 0              | -1.380799               | 4.108301  | -1.424941 |
| 10               | 1                | 0              | -3.523278               | 3.251756  | -2.392641 |
| 11               | 7                | 0              | 0.381886                | 2.460673  | 1.547130  |
| 12               | 6                | 0              | 2.325947                | 3.994824  | 0.251213  |
| 13               | 6                | 0              | 1.452668                | 2.914530  | 2.197604  |

-----

|    |   |   |           |           |           |
|----|---|---|-----------|-----------|-----------|
| 14 | 6 | 0 | 0.274465  | 2.762097  | 0.248274  |
| 15 | 6 | 0 | 1.209350  | 3.536436  | -0.439020 |
| 16 | 6 | 0 | 2.455424  | 3.675542  | 1.598122  |
| 17 | 1 | 0 | 1.514905  | 2.657636  | 3.252175  |
| 18 | 1 | 0 | 1.077128  | 3.745133  | -1.495699 |
| 19 | 1 | 0 | 3.309506  | 4.006513  | 2.178214  |
| 20 | 1 | 0 | 3.084198  | 4.582222  | -0.256316 |
| 21 | 7 | 0 | -1.941581 | -1.471325 | 0.509612  |
| 22 | 6 | 0 | -4.503203 | -2.518517 | 0.352212  |
| 23 | 6 | 0 | -2.915839 | -0.784412 | -0.113239 |
| 24 | 6 | 0 | -2.225698 | -2.653282 | 1.058945  |
| 25 | 6 | 0 | -3.497084 | -3.214638 | 1.011502  |
| 26 | 6 | 0 | -4.212501 | -1.283914 | -0.217639 |
| 27 | 1 | 0 | -1.399975 | -3.162002 | 1.544336  |
| 28 | 1 | 0 | -3.683088 | -4.174229 | 1.478881  |
| 29 | 1 | 0 | -4.990021 | -0.718218 | -0.716116 |
| 30 | 1 | 0 | -5.506994 | -2.924631 | 0.287287  |
| 31 | 6 | 0 | 0.856311  | -2.359776 | 0.510634  |
| 32 | 1 | 0 | 0.293622  | -3.188037 | 0.050274  |
| 33 | 1 | 0 | 0.881525  | -2.576992 | 1.593692  |
| 34 | 6 | 0 | 1.663420  | 0.070926  | -0.287414 |
| 35 | 1 | 0 | 1.570439  | 0.683254  | -1.200779 |
| 36 | 1 | 0 | 2.037692  | 0.758050  | 0.487528  |
| 37 | 6 | 0 | 2.665010  | -1.038618 | -0.489711 |
| 38 | 6 | 0 | 4.379658  | -3.241966 | -0.749877 |
| 39 | 6 | 0 | 2.252881  | -2.303289 | -0.052652 |
| 40 | 6 | 0 | 3.936222  | -0.889278 | -1.056597 |
| 41 | 6 | 0 | 4.790238  | -1.983001 | -1.190780 |
| 42 | 6 | 0 | 3.115698  | -3.396675 | -0.181680 |
| 43 | 1 | 0 | 4.256045  | 0.093009  | -1.401307 |
| 44 | 1 | 0 | 5.771965  | -1.856967 | -1.639873 |
| 45 | 1 | 0 | 2.789750  | -4.379326 | 0.156030  |
| 46 | 1 | 0 | 5.040710  | -4.098335 | -0.853998 |

-----

Zero-point correction= 0.367060  
(Hartree/Particle)  
Thermal correction to Energy= 0.388985  
Thermal correction to Enthalpy= 0.389929  
Thermal correction to Gibbs Free Energy= 0.315346  
Sum of electronic and zero-point Energies= -1220.641926  
Sum of electronic and thermal Energies= -1220.620001  
Sum of electronic and thermal Enthalpies= -1220.619057  
Sum of electronic and thermal Free Energies= -1220.693640

**lit**

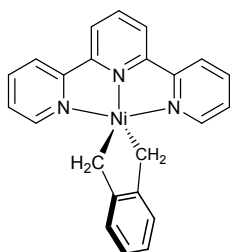

-----

| Center Number | Atomic Number | Atomic Type | Coordinates (Angstroms) |           |           |
|---------------|---------------|-------------|-------------------------|-----------|-----------|
|               |               |             | X                       | Y         | Z         |
| 1             | 28            | 0           | 0.128304                | -0.594364 | -0.377619 |
| 2             | 7             | 0           | 1.308965                | 1.161272  | -0.068425 |
| 3             | 6             | 0           | 2.810561                | 3.397735  | 0.467049  |

-----

|    |   |   |           |           |           |
|----|---|---|-----------|-----------|-----------|
| 4  | 6 | 0 | 0.711274  | 2.354791  | -0.017930 |
| 5  | 6 | 0 | 2.624433  | 1.036755  | 0.134733  |
| 6  | 6 | 0 | 3.418776  | 2.148750  | 0.412367  |
| 7  | 6 | 0 | 1.443371  | 3.513376  | 0.248696  |
| 8  | 1 | 0 | 4.484931  | 2.053970  | 0.576177  |
| 9  | 1 | 0 | 0.968249  | 4.485693  | 0.283020  |
| 10 | 1 | 0 | 3.403217  | 4.281461  | 0.677427  |
| 11 | 7 | 0 | -1.287378 | 1.143881  | -0.573582 |
| 12 | 6 | 0 | -2.917181 | 3.382350  | -0.346832 |
| 13 | 6 | 0 | -2.604088 | 1.050087  | -0.770161 |
| 14 | 6 | 0 | -0.759912 | 2.339125  | -0.255386 |
| 15 | 6 | 0 | -1.546001 | 3.483626  | -0.134928 |
| 16 | 6 | 0 | -3.458873 | 2.145166  | -0.667826 |
| 17 | 1 | 0 | -2.983977 | 0.059660  | -1.003191 |
| 18 | 1 | 0 | -1.106988 | 4.437873  | 0.129191  |
| 19 | 1 | 0 | -4.522196 | 2.015101  | -0.832875 |
| 20 | 1 | 0 | -3.548537 | 4.260133  | -0.256178 |
| 21 | 7 | 0 | 2.246973  | -1.288137 | -0.305554 |
| 22 | 6 | 0 | 4.888109  | -2.002683 | 0.134926  |
| 23 | 6 | 0 | 3.150955  | -0.353704 | 0.031890  |
| 24 | 6 | 0 | 2.635715  | -2.556124 | -0.430265 |
| 25 | 6 | 0 | 3.949816  | -2.963868 | -0.221032 |
| 26 | 6 | 0 | 4.486999  | -0.677317 | 0.263947  |
| 27 | 1 | 0 | 1.859346  | -3.262725 | -0.707585 |
| 28 | 1 | 0 | 4.220994  | -4.006926 | -0.333858 |
| 29 | 1 | 0 | 5.205690  | 0.082974  | 0.544892  |
| 30 | 1 | 0 | 5.922776  | -2.276780 | 0.311929  |
| 31 | 6 | 0 | -0.901243 | -2.315786 | -1.051646 |
| 32 | 1 | 0 | -0.264076 | -3.110471 | -0.631577 |
| 33 | 1 | 0 | -1.131657 | -2.586033 | -2.089607 |
| 34 | 6 | 0 | -0.601840 | -1.255576 | 1.493428  |
| 35 | 1 | 0 | 0.010671  | -2.160101 | 1.622692  |
| 36 | 1 | 0 | -0.573874 | -0.666143 | 2.417234  |
| 37 | 6 | 0 | -1.984018 | -1.568312 | 1.057868  |
| 38 | 6 | 0 | -4.566366 | -1.976053 | -0.013765 |
| 39 | 6 | 0 | -2.138031 | -2.147432 | -0.241172 |
| 40 | 6 | 0 | -3.132547 | -1.189543 | 1.759576  |
| 41 | 6 | 0 | -4.415534 | -1.375150 | 1.232051  |
| 42 | 6 | 0 | -3.429360 | -2.364694 | -0.732387 |
| 43 | 1 | 0 | -3.017448 | -0.717179 | 2.734274  |
| 44 | 1 | 0 | -5.287315 | -1.057760 | 1.798587  |
| 45 | 1 | 0 | -3.545543 | -2.806767 | -1.721113 |
| 46 | 1 | 0 | -5.556765 | -2.136000 | -0.432385 |

```

-----
Zero-point correction=                0.365781
(Hartree/Particle)
Thermal correction to Energy=         0.387800
Thermal correction to Enthalpy=       0.388745
Thermal correction to Gibbs Free Energy= 0.313034
Sum of electronic and zero-point Energies= -1220.657297
Sum of electronic and thermal Energies= -1220.635277
Sum of electronic and thermal Enthalpies= -1220.634333
Sum of electronic and thermal Free Energies= -1220.710044

```

TS-(II-IV)s



Imaginary frequency = -513.7289 cm<sup>-1</sup>

| Center Number | Atomic Number | Atomic Type | Coordinates (Angstroms) |           |           |
|---------------|---------------|-------------|-------------------------|-----------|-----------|
|               |               |             | X                       | Y         | Z         |
| 1             | 28            | 0           | -0.162514               | -0.191912 | -0.234089 |
| 2             | 7             | 0           | -1.754208               | 0.710996  | 0.307407  |
| 3             | 6             | 0           | -4.188411               | 2.083235  | 0.195492  |
| 4             | 6             | 0           | -2.942029               | 0.021296  | 0.190491  |
| 5             | 6             | 0           | -1.780567               | 2.083534  | 0.179789  |
| 6             | 6             | 0           | -2.976550               | 2.783734  | 0.164176  |
| 7             | 6             | 0           | -4.161405               | 0.687466  | 0.171976  |
| 8             | 1             | 0           | -2.968731               | 3.866501  | 0.085187  |
| 9             | 1             | 0           | -5.085234               | 0.121922  | 0.097909  |
| 10            | 1             | 0           | -5.131649               | 2.615850  | 0.158917  |
| 11            | 7             | 0           | -1.485613               | -1.746505 | -0.388675 |
| 12            | 6             | 0           | -3.430176               | -3.705132 | 0.157415  |
| 13            | 6             | 0           | -1.215616               | -3.067092 | -0.501650 |
| 14            | 6             | 0           | -2.746150               | -1.397493 | 0.034518  |
| 15            | 6             | 0           | -3.724982               | -2.370538 | 0.315739  |
| 16            | 6             | 0           | -2.133190               | -4.064724 | -0.260711 |
| 17            | 1             | 0           | -0.208561               | -3.320753 | -0.818320 |
| 18            | 1             | 0           | -4.697493               | -2.054037 | 0.678161  |
| 19            | 1             | 0           | -1.852636               | -5.101907 | -0.402692 |
| 20            | 1             | 0           | -4.174645               | -4.465607 | 0.368118  |
| 21            | 7             | 0           | 0.468891                | 1.741230  | -0.433463 |
| 22            | 6             | 0           | 1.181991                | 4.404104  | 0.071416  |
| 23            | 6             | 0           | -0.462106               | 2.647725  | 0.003971  |
| 24            | 6             | 0           | 1.739781                | 2.169891  | -0.593765 |
| 25            | 6             | 0           | 2.137307                | 3.471370  | -0.373215 |
| 26            | 6             | 0           | -0.115956               | 3.984256  | 0.269315  |
| 27            | 1             | 0           | 2.455223                | 1.423262  | -0.929017 |
| 28            | 1             | 0           | 3.167883                | 3.758099  | -0.547556 |
| 29            | 1             | 0           | -0.870680               | 4.666261  | 0.646767  |
| 30            | 1             | 0           | 1.464879                | 5.432242  | 0.271542  |
| 31            | 6             | 0           | 1.569773                | -1.102949 | -1.014192 |
| 32            | 1             | 0           | 1.363525                | -0.355474 | -1.792470 |
| 33            | 1             | 0           | 1.234721                | -2.078796 | -1.371951 |
| 34            | 6             | 0           | 1.373418                | -1.151813 | 1.003553  |
| 35            | 1             | 0           | 0.990607                | -0.391001 | 1.689860  |
| 36            | 1             | 0           | 0.926455                | -2.123870 | 1.226299  |
| 37            | 6             | 0           | 2.862055                | -1.163991 | 0.828828  |
| 38            | 6             | 0           | 5.361508                | -1.151157 | -0.321563 |
| 39            | 6             | 0           | 2.998516                | -1.120701 | -0.544824 |
| 40            | 6             | 0           | 3.961706                | -1.210047 | 1.673710  |
| 41            | 6             | 0           | 5.223656                | -1.199861 | 1.068499  |
| 42            | 6             | 0           | 4.241962                | -1.113065 | -1.160779 |
| 43            | 1             | 0           | 3.860777                | -1.240240 | 2.754734  |
| 44            | 1             | 0           | 6.114565                | -1.222022 | 1.688682  |



|                                              |   |   |              |           |           |
|----------------------------------------------|---|---|--------------|-----------|-----------|
| 45                                           | 1 | 0 | 4.353798     | -1.068585 | -2.240495 |
| 46                                           | 1 | 0 | 6.356902     | -1.136655 | -0.755207 |
| -----                                        |   |   |              |           |           |
| Zero-point correction=                       |   |   | 0.364451     |           |           |
| (Hartree/Particle)                           |   |   |              |           |           |
| Thermal correction to Energy=                |   |   | 0.385925     |           |           |
| Thermal correction to Enthalpy=              |   |   | 0.386869     |           |           |
| Thermal correction to Gibbs Free Energy=     |   |   | 0.313422     |           |           |
| Sum of electronic and zero-point Energies=   |   |   | -1220.559307 |           |           |
| Sum of electronic and thermal Energies=      |   |   | -1220.537834 |           |           |
| Sum of electronic and thermal Enthalpies=    |   |   | -1220.536890 |           |           |
| Sum of electronic and thermal Free Energies= |   |   | -1220.610337 |           |           |

**TS-(II-IV)t**



Imaginary frequency =  $-333.2421 \text{ cm}^{-1}$

| Center Number | Atomic Number | Atomic Type | Coordinates (Angstroms) |           |           |
|---------------|---------------|-------------|-------------------------|-----------|-----------|
|               |               |             | X                       | Y         | Z         |
| 1             | 28            | 0           | 0.065041                | -0.318773 | -0.000124 |
| 2             | 7             | 0           | 1.743789                | 0.810526  | 0.000013  |
| 3             | 6             | 0           | 4.073590                | 2.306462  | 0.000260  |
| 4             | 6             | 0           | 1.680070                | 2.156295  | 0.000113  |
| 5             | 6             | 0           | 2.955939                | 0.165154  | 0.000032  |
| 6             | 6             | 0           | 4.146122                | 0.934082  | 0.000160  |
| 7             | 6             | 0           | 2.808222                | 2.950550  | 0.000238  |
| 8             | 1             | 0           | 5.114473                | 0.444701  | 0.000176  |
| 9             | 1             | 0           | 2.747016                | 4.031585  | 0.000317  |
| 10            | 1             | 0           | 4.981004                | 2.901096  | 0.000354  |
| 11            | 7             | 0           | -0.692367               | 1.776851  | -0.000040 |
| 12            | 6             | 0           | -1.325779               | 4.475916  | 0.000086  |
| 13            | 6             | 0           | -1.966478               | 2.178987  | -0.000089 |
| 14            | 6             | 0           | 0.291224                | 2.697446  | 0.000073  |
| 15            | 6             | 0           | 0.000220                | 4.064379  | 0.000139  |
| 16            | 6             | 0           | -2.336676               | 3.517557  | -0.000030 |
| 17            | 1             | 0           | -2.713101               | 1.387091  | -0.000184 |
| 18            | 1             | 0           | 0.797968                | 4.797373  | 0.000231  |
| 19            | 1             | 0           | -3.384050               | 3.795925  | -0.000075 |
| 20            | 1             | 0           | -1.567403               | 5.533831  | 0.000134  |
| 21            | 7             | 0           | 1.620619                | -1.813286 | -0.000213 |
| 22            | 6             | 0           | 3.865581                | -3.480417 | -0.000215 |
| 23            | 6             | 0           | 2.886158                | -1.267115 | -0.000090 |
| 24            | 6             | 0           | 1.498798                | -3.148008 | -0.000334 |
| 25            | 6             | 0           | 2.562105                | -4.029222 | -0.000345 |
| 26            | 6             | 0           | 4.023920                | -2.116720 | -0.000090 |
| 27            | 1             | 0           | 0.475451                | -3.522044 | -0.000425 |
| 28            | 1             | 0           | 2.392793                | -5.099182 | -0.000445 |
| 29            | 1             | 0           | 5.019657                | -1.686549 | 0.000015  |
| 30            | 1             | 0           | 4.735754                | -4.129635 | -0.000214 |
| 31            | 6             | 0           | -1.454840               | -1.250566 | -1.054870 |
| 32            | 1             | 0           | -1.048491               | -2.224402 | -1.343477 |
| 33            | 1             | 0           | -1.183954               | -0.498180 | -1.810357 |
| 34            | 6             | 0           | -1.454657               | -1.250717 | 1.054740  |
| 35            | 1             | 0           | -1.048262               | -2.224604 | 1.343110  |
| 36            | 1             | 0           | -1.183631               | -0.498461 | 1.810306  |

|    |   |   |           |           |           |
|----|---|---|-----------|-----------|-----------|
| 37 | 6 | 0 | -2.911712 | -1.286047 | 0.691522  |
| 38 | 6 | 0 | -5.289578 | -1.353082 | -0.698415 |
| 39 | 6 | 0 | -2.911833 | -1.285962 | -0.691402 |
| 40 | 6 | 0 | -4.091667 | -1.323602 | 1.421789  |
| 41 | 6 | 0 | -5.289453 | -1.353166 | 0.698959  |
| 42 | 6 | 0 | -4.091922 | -1.323428 | -1.421459 |
| 43 | 1 | 0 | -4.096016 | -1.317286 | 2.508172  |
| 44 | 1 | 0 | -6.236032 | -1.370035 | 1.230656  |
| 45 | 1 | 0 | -4.096470 | -1.316979 | -2.507841 |
| 46 | 1 | 0 | -6.236253 | -1.369886 | -1.229945 |

```

-----
Zero-point correction=                0.363330
(Hartree/Particle)
Thermal correction to Energy=          0.385402
Thermal correction to Enthalpy=        0.386346
Thermal correction to Gibbs Free Energy= 0.309166
Sum of electronic and zero-point Energies= -1220.616947
Sum of electronic and thermal Energies= -1220.594874
Sum of electronic and thermal Enthalpies= -1220.593930
Sum of electronic and thermal Free Energies= -1220.671111

```

### IIIs

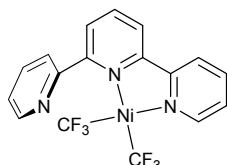

| Center Number | Atomic Number | Atomic Type | Coordinates (Angstroms) |           |           |
|---------------|---------------|-------------|-------------------------|-----------|-----------|
|               |               |             | X                       | Y         | Z         |
| 1             | 28            | 0           | 0.377269                | -0.603828 | 0.038948  |
| 2             | 9             | 0           | -1.517441               | -0.008175 | 1.958091  |
| 3             | 9             | 0           | -2.194532               | -1.668865 | 0.752882  |
| 4             | 9             | 0           | 1.841081                | -2.881808 | 0.672022  |
| 5             | 9             | 0           | 1.266115                | -2.696145 | -1.409180 |
| 6             | 9             | 0           | -0.159277               | -3.400944 | 0.044666  |
| 7             | 9             | 0           | -0.629290               | -1.951007 | 2.214619  |
| 8             | 7             | 0           | 0.021511                | 1.381207  | -0.024198 |
| 9             | 7             | 0           | -2.067318               | 0.228028  | -1.438557 |
| 10            | 7             | 0           | 2.246265                | 0.080447  | -0.456962 |
| 11            | 6             | 0           | 1.133432                | 2.118611  | 0.125530  |
| 12            | 6             | 0           | -3.596957               | 1.309706  | 0.069554  |
| 13            | 6             | 0           | -1.315085               | 3.341832  | 0.162399  |
| 14            | 6             | 0           | -4.636570               | 0.506574  | -0.383900 |
| 15            | 6             | 0           | -2.331121               | 1.131473  | -0.487125 |
| 16            | 6             | 0           | 2.400150                | 1.367884  | -0.078875 |
| 17            | 6             | 0           | -0.176843               | 4.097054  | 0.413068  |
| 18            | 6             | 0           | 0.808610                | -2.467651 | -0.124623 |
| 19            | 6             | 0           | -3.073641               | -0.535259 | -1.862829 |
| 20            | 6             | 0           | 1.072447                | 3.489000  | 0.365832  |
| 21            | 6             | 0           | 3.331071                | -0.645751 | -0.742059 |
| 22            | 6             | 0           | -4.373619               | -0.434431 | -1.373103 |
| 23            | 6             | 0           | 3.657824                | 1.949582  | 0.043825  |
| 24            | 6             | 0           | 4.619618                | -0.127776 | -0.662667 |
| 25            | 6             | 0           | 4.783683                | 1.187951  | -0.251153 |
| 26            | 6             | 0           | -1.064927               | -1.093150 | 1.240502  |
| 27            | 6             | 0           | -1.177824               | 1.973756  | -0.071938 |
| 28            | 1             | 0           | -3.753169               | 2.038757  | 0.857547  |
| 29            | 1             | 0           | -2.293451               | 3.805285  | 0.108896  |

|                                              |   |   |           |              |           |
|----------------------------------------------|---|---|-----------|--------------|-----------|
| 30                                           | 1 | 0 | -5.632364 | 0.609954     | 0.034573  |
| 31                                           | 1 | 0 | -0.256332 | 5.162718     | 0.598879  |
| 32                                           | 1 | 0 | -2.829800 | -1.262235    | -2.633245 |
| 33                                           | 1 | 0 | 1.972235  | 4.077123     | 0.494825  |
| 34                                           | 1 | 0 | 3.151986  | -1.670107    | -1.041149 |
| 35                                           | 1 | 0 | -5.152697 | -1.083284    | -1.756991 |
| 36                                           | 1 | 0 | 3.764506  | 2.978078     | 0.365264  |
| 37                                           | 1 | 0 | 5.467703  | -0.753580    | -0.912767 |
| 38                                           | 1 | 0 | 5.773253  | 1.622775     | -0.160915 |
| -----                                        |   |   |           |              |           |
| Zero-point correction=                       |   |   |           | 0.261520     |           |
| (Hartree/Particle)                           |   |   |           |              |           |
| Thermal correction to Energy=                |   |   |           | 0.284475     |           |
| Thermal correction to Enthalpy=              |   |   |           | 0.285419     |           |
| Thermal correction to Gibbs Free Energy=     |   |   |           | 0.208821     |           |
| Sum of electronic and zero-point Energies=   |   |   |           | -1586.299087 |           |
| Sum of electronic and thermal Energies=      |   |   |           | -1586.276131 |           |
| Sum of electronic and thermal Enthalpies=    |   |   |           | -1586.275187 |           |
| Sum of electronic and thermal Free Energies= |   |   |           | -1586.351786 |           |

IIIc



| Center Number | Atomic Number | Atomic Type | Coordinates (Angstroms) |           |           |
|---------------|---------------|-------------|-------------------------|-----------|-----------|
|               |               |             | X                       | Y         | Z         |
| 1             | 28            | 0           | 0.050808                | -0.606141 | -0.260836 |
| 2             | 9             | 0           | -0.981586               | 0.409727  | 2.243589  |
| 3             | 9             | 0           | -1.084602               | -1.749079 | 2.153919  |
| 4             | 9             | 0           | 1.050387                | -3.243167 | 0.270865  |
| 5             | 9             | 0           | 0.949373                | -2.889025 | -1.856367 |
| 6             | 9             | 0           | -0.843102               | -3.417237 | -0.760195 |
| 7             | 9             | 0           | 0.791689                | -0.775403 | 2.615375  |
| 8             | 7             | 0           | -0.012166               | 1.471934  | -0.351570 |
| 9             | 7             | 0           | -2.051644               | -0.158457 | -0.551454 |
| 10            | 7             | 0           | 2.134301                | -0.026177 | -0.297616 |
| 11            | 6             | 0           | 1.131427                | 2.151545  | -0.257713 |
| 12            | 6             | 0           | -3.687492               | 1.572140  | -0.379485 |
| 13            | 6             | 0           | -1.290002               | 3.461336  | -0.231488 |
| 14            | 6             | 0           | -4.701902               | 0.621814  | -0.459447 |
| 15            | 6             | 0           | -2.364265               | 1.144169  | -0.426309 |
| 16            | 6             | 0           | 2.356873                | 1.300593  | -0.266315 |
| 17            | 6             | 0           | -0.108292               | 4.190460  | -0.138844 |
| 18            | 6             | 0           | 0.273324                | -2.614097 | -0.681924 |
| 19            | 6             | 0           | -3.021575               | -1.068792 | -0.619431 |
| 20            | 6             | 0           | 1.122841                | 3.541478  | -0.147978 |
| 21            | 6             | 0           | 3.164217                | -0.871077 | -0.299660 |
| 22            | 6             | 0           | -4.369315               | -0.721629 | -0.580636 |
| 23            | 6             | 0           | 3.647710                | 1.820267  | -0.242261 |
| 24            | 6             | 0           | 4.484551                | -0.430876 | -0.273909 |
| 25            | 6             | 0           | 4.724538                | 0.937556  | -0.246573 |
| 26            | 6             | 0           | -0.290102               | -0.693715 | 1.775559  |
| 27            | 6             | 0           | -1.201615               | 2.073358  | -0.334319 |
| 28            | 1             | 0           | -3.930080               | 2.622881  | -0.276128 |
| 29            | 1             | 0           | -2.246421               | 3.969451  | -0.220252 |
| 30            | 1             | 0           | -5.740480               | 0.933252  | -0.424450 |

|                                              |   |   |           |              |           |
|----------------------------------------------|---|---|-----------|--------------|-----------|
| 31                                           | 1 | 0 | -0.147327 | 5.271114     | -0.054835 |
| 32                                           | 1 | 0 | -2.690851 | -2.099351    | -0.704232 |
| 33                                           | 1 | 0 | 2.041802  | 4.108412     | -0.064520 |
| 34                                           | 1 | 0 | 2.908876  | -1.925903    | -0.317113 |
| 35                                           | 1 | 0 | -5.130669 | -1.490101    | -0.642615 |
| 36                                           | 1 | 0 | 3.818284  | 2.889960     | -0.223440 |
| 37                                           | 1 | 0 | 5.296384  | -1.148479    | -0.275876 |
| 38                                           | 1 | 0 | 5.739465  | 1.320077     | -0.228922 |
| -----                                        |   |   |           |              |           |
| Zero-point correction=                       |   |   |           | 0.259634     |           |
| (Hartree/Particle)                           |   |   |           |              |           |
| Thermal correction to Energy=                |   |   |           | 0.283484     |           |
| Thermal correction to Enthalpy=              |   |   |           | 0.284429     |           |
| Thermal correction to Gibbs Free Energy=     |   |   |           | 0.203226     |           |
| Sum of electronic and zero-point Energies=   |   |   |           | -1586.312544 |           |
| Sum of electronic and thermal Energies=      |   |   |           | -1586.288693 |           |
| Sum of electronic and thermal Enthalpies=    |   |   |           | -1586.287749 |           |
| Sum of electronic and thermal Free Energies= |   |   |           | -1586.368952 |           |

### TS-(III-IV)t



Imaginary frequency = -271.2748 cm<sup>-1</sup>

| -----         |               |             |                         |           |           |  |
|---------------|---------------|-------------|-------------------------|-----------|-----------|--|
| Center Number | Atomic Number | Atomic Type | Coordinates (Angstroms) |           |           |  |
|               |               |             | X                       | Y         | Z         |  |
| -----         |               |             |                         |           |           |  |
| 1             | 28            | 0           | -0.018968               | -0.312613 | -0.021160 |  |
| 2             | 9             | 0           | -0.772968               | -1.565817 | 1.921942  |  |
| 3             | 9             | 0           | -0.513728               | -3.479885 | 1.051628  |  |
| 4             | 9             | 0           | 1.032022                | -3.289223 | -0.843725 |  |
| 5             | 9             | 0           | 0.555361                | -1.543745 | -1.956203 |  |
| 6             | 9             | 0           | -1.044367               | -2.805756 | -1.268385 |  |
| 7             | 9             | 0           | 1.227565                | -2.281788 | 1.501725  |  |
| 8             | 7             | 0           | -0.039049               | 1.674820  | -0.001521 |  |
| 9             | 7             | 0           | -2.103997               | 0.063062  | -0.099971 |  |
| 10            | 7             | 0           | 2.103381                | 0.170304  | -0.014873 |  |
| 11            | 6             | 0           | 1.110870                | 2.367886  | 0.050881  |  |
| 12            | 6             | 0           | -3.732000               | 1.860619  | -0.087321 |  |
| 13            | 6             | 0           | -1.294091               | 3.713985  | 0.043823  |  |
| 14            | 6             | 0           | -4.760180               | 0.951521  | -0.110728 |  |
| 15            | 6             | 0           | -2.385019               | 1.416052  | -0.071514 |  |
| 16            | 6             | 0           | 2.323881                | 1.503862  | 0.020416  |  |
| 17            | 6             | 0           | -0.116960               | 4.423482  | 0.107469  |  |
| 18            | 6             | 0           | 0.133936                | -2.305742 | -0.926609 |  |
| 19            | 6             | 0           | -3.132919               | -0.800654 | -0.111386 |  |
| 20            | 6             | 0           | 1.131260                | 3.746119  | 0.109738  |  |
| 21            | 6             | 0           | 3.153060                | -0.655955 | -0.085856 |  |
| 22            | 6             | 0           | -4.461407               | -0.430627 | -0.116521 |  |
| 23            | 6             | 0           | 3.620044                | 2.022921  | 0.005417  |  |
| 24            | 6             | 0           | 4.468530                | -0.215173 | -0.111360 |  |
| 25            | 6             | 0           | 4.702451                | 1.156613  | -0.058271 |  |
| 26            | 6             | 0           | -0.019146               | -2.244299 | 1.047643  |  |
| 27            | 6             | 0           | -1.256391               | 2.299599  | -0.012058 |  |
| 28            | 1             | 0           | -3.945688               | 2.924019  | -0.076590 |  |
| 29            | 1             | 0           | -2.242222               | 4.241148  | 0.040531  |  |
| 30            | 1             | 0           | -5.790691               | 1.292638  | -0.121020 |  |

|    |   |   |           |           |           |
|----|---|---|-----------|-----------|-----------|
| 31 | 1 | 0 | -0.138665 | 5.507098  | 0.155143  |
| 32 | 1 | 0 | -2.859574 | -1.852853 | -0.116352 |
| 33 | 1 | 0 | 2.056180  | 4.307048  | 0.157550  |
| 34 | 1 | 0 | 2.924951  | -1.716627 | -0.122222 |
| 35 | 1 | 0 | -5.240808 | -1.182936 | -0.127225 |
| 36 | 1 | 0 | 3.779646  | 3.093889  | 0.035583  |
| 37 | 1 | 0 | 5.280575  | -0.930085 | -0.171203 |
| 38 | 1 | 0 | 5.714579  | 1.547190  | -0.072576 |

-----

Zero-point correction= 0.258689  
(Hartree/Particle)  
Thermal correction to Energy= 0.281127  
Thermal correction to Enthalpy= 0.282071  
Thermal correction to Gibbs Free Energy= 0.205105  
Sum of electronic and zero-point Energies= -1586.221922  
Sum of electronic and thermal Energies= -1586.199484  
Sum of electronic and thermal Enthalpies= -1586.198540  
Sum of electronic and thermal Free Energies= -1586.275506

#### IVs

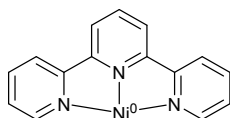

| Center Number | Atomic Number | Atomic Type | Coordinates (Angstroms) |           |           |
|---------------|---------------|-------------|-------------------------|-----------|-----------|
|               |               |             | X                       | Y         | Z         |
| 1             | 1             | 0           | -0.050701               | 0.171441  | 5.684847  |
| 2             | 6             | 0           | 0.218900                | 0.097176  | 4.636419  |
| 3             | 7             | 0           | 0.925805                | -0.123780 | 1.944699  |
| 4             | 6             | 0           | -0.752129               | 0.159261  | 3.661795  |
| 5             | 6             | 0           | 1.568290                | -0.040223 | 4.255421  |
| 6             | 6             | 0           | 1.864732                | -0.143476 | 2.913941  |
| 7             | 6             | 0           | -0.386958               | 0.062295  | 2.305544  |
| 8             | 1             | 0           | -1.794615               | 0.309710  | 3.921965  |
| 9             | 1             | 0           | 2.361912                | -0.084155 | 4.991731  |
| 10            | 1             | 0           | 2.886713                | -0.277228 | 2.571281  |
| 11            | 6             | 0           | -1.294969               | 0.149543  | 1.187791  |
| 12            | 6             | 0           | -2.644646               | -0.164840 | -1.203870 |
| 13            | 6             | 0           | -2.644646               | -0.164840 | 1.203870  |
| 14            | 7             | 0           | -0.651045               | 0.486837  | 0.000000  |
| 15            | 6             | 0           | -1.294969               | 0.149543  | -1.187791 |
| 16            | 6             | 0           | -3.353023               | -0.262717 | 0.000000  |
| 17            | 1             | 0           | -3.134761               | -0.387778 | 2.147112  |
| 18            | 1             | 0           | -4.404069               | -0.526262 | 0.000000  |
| 19            | 1             | 0           | -3.134761               | -0.387778 | -2.147112 |
| 20            | 6             | 0           | -0.386958               | 0.062295  | -2.305544 |
| 21            | 6             | 0           | 1.568290                | -0.040223 | -4.255421 |
| 22            | 6             | 0           | -0.752129               | 0.159261  | -3.661795 |
| 23            | 7             | 0           | 0.925805                | -0.123780 | -1.944699 |
| 24            | 6             | 0           | 1.864732                | -0.143476 | -2.913941 |
| 25            | 6             | 0           | 0.218900                | 0.097176  | -4.636419 |
| 26            | 1             | 0           | -1.794615               | 0.309710  | -3.921965 |
| 27            | 1             | 0           | 2.886713                | -0.277228 | -2.571281 |
| 28            | 1             | 0           | -0.050701               | 0.171441  | -5.684847 |
| 29            | 1             | 0           | 2.361912                | -0.084155 | -4.991731 |
| 30            | 28            | 0           | 1.167947                | -0.016900 | -0.000000 |

-----

Zero-point correction= 0.229212  
(Hartree/Particle)

Thermal correction to Energy= 0.243359  
 Thermal correction to Enthalpy= 0.244303  
 Thermal correction to Gibbs Free Energy= 0.188082  
 Sum of electronic and zero-point Energies= -911.235903  
 Sum of electronic and thermal Energies= -911.221756  
 Sum of electronic and thermal Enthalpies= -911.220812  
 Sum of electronic and thermal Free Energies= -911.277032

IVt



| Center Number | Atomic Number | Atomic Type | Coordinates (Angstroms) |           |           |
|---------------|---------------|-------------|-------------------------|-----------|-----------|
|               |               |             | X                       | Y         | Z         |
| 1             | 1             | 0           | 0.264800                | 0.000024  | 5.741122  |
| 2             | 6             | 0           | -0.078129               | 0.000018  | 4.711564  |
| 3             | 7             | 0           | -0.959125               | -0.000005 | 2.058393  |
| 4             | 6             | 0           | 0.832393                | -0.000011 | 3.674469  |
| 5             | 6             | 0           | -1.450685               | 0.000038  | 4.414019  |
| 6             | 6             | 0           | -1.826742               | 0.000023  | 3.083910  |
| 7             | 6             | 0           | 0.382608                | -0.000016 | 2.342249  |
| 8             | 1             | 0           | 1.896852                | -0.000031 | 3.881748  |
| 9             | 1             | 0           | -2.202435               | 0.000063  | 5.194487  |
| 10            | 1             | 0           | -2.877602               | 0.000030  | 2.807371  |
| 11            | 6             | 0           | 1.282080                | -0.000034 | 1.188017  |
| 12            | 6             | 0           | 2.671693                | 0.000022  | -1.215805 |
| 13            | 6             | 0           | 2.671693                | 0.000022  | 1.215805  |
| 14            | 7             | 0           | 0.626537                | -0.000091 | -0.000000 |
| 15            | 6             | 0           | 1.282080                | -0.000034 | -1.188017 |
| 16            | 6             | 0           | 3.370380                | 0.000037  | -0.000000 |
| 17            | 1             | 0           | 3.218712                | 0.000068  | 2.152942  |
| 18            | 1             | 0           | 4.454609                | 0.000082  | -0.000000 |
| 19            | 1             | 0           | 3.218712                | 0.000068  | -2.152942 |
| 20            | 6             | 0           | 0.382608                | -0.000016 | -2.342249 |
| 21            | 6             | 0           | -1.450685               | 0.000038  | -4.414019 |
| 22            | 6             | 0           | 0.832393                | -0.000011 | -3.674469 |
| 23            | 7             | 0           | -0.959125               | -0.000005 | -2.058393 |
| 24            | 6             | 0           | -1.826742               | 0.000023  | -3.083910 |
| 25            | 6             | 0           | -0.078129               | 0.000018  | -4.711564 |
| 26            | 1             | 0           | 1.896852                | -0.000031 | -3.881748 |
| 27            | 1             | 0           | -2.877602               | 0.000030  | -2.807371 |
| 28            | 1             | 0           | 0.264800                | 0.000024  | -5.741122 |
| 29            | 1             | 0           | -2.202435               | 0.000063  | -5.194487 |
| 30            | 28            | 0           | -1.356935               | -0.000014 | 0.000000  |

Zero-point correction= 0.226755  
 (Hartree/Particle)

ethene Thermal correction to Energy= 0.241239  
 Thermal correction to Enthalpy= 0.242183  
 Thermal correction to Gibbs Free Energy= 0.183810  
 Sum of electronic and zero-point Energies= -911.291916  
 Sum of electronic and thermal Energies= -911.277432  
 Sum of electronic and thermal Enthalpies= -911.276488  
 Sum of electronic and thermal Free Energies= -911.334861

## Ethane

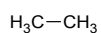

| Center Number | Atomic Number | Atomic Type | Coordinates (Angstroms) |           |           |
|---------------|---------------|-------------|-------------------------|-----------|-----------|
|               |               |             | X                       | Y         | Z         |
| 1             | 1             | 0           | 0.000000                | 1.019507  | 1.159380  |
| 2             | 6             | 0           | 0.000000                | 0.000000  | 0.763044  |
| 3             | 1             | 0           | 0.882919                | -0.509754 | 1.159380  |
| 4             | 1             | 0           | -0.882919               | -0.509753 | 1.159380  |
| 5             | 6             | 0           | -0.000000               | -0.000000 | -0.763044 |
| 6             | 1             | 0           | 0.882919                | 0.509753  | -1.159380 |
| 7             | 1             | 0           | -0.882919               | 0.509754  | -1.159380 |
| 8             | 1             | 0           | -0.000000               | -1.019507 | -1.159380 |

Zero-point correction= 0.075553  
(Hartree/Particle)  
Thermal correction to Energy= 0.079053  
Thermal correction to Enthalpy= 0.079997  
Thermal correction to Gibbs Free Energy= 0.054111  
Sum of electronic and zero-point Energies= -79.695553  
Sum of electronic and thermal Energies= -79.692053  
Sum of electronic and thermal Enthalpies= -79.691109  
Sum of electronic and thermal Free Energies= -79.716996

## Benzocyclobutane

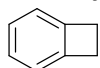

| Center Number | Atomic Number | Atomic Type | Coordinates (Angstroms) |           |           |
|---------------|---------------|-------------|-------------------------|-----------|-----------|
|               |               |             | X                       | Y         | Z         |
| 1             | 1             | 0           | 0.000000                | 2.523299  | -0.733576 |
| 2             | 6             | 0           | 0.000000                | 1.437364  | -0.717871 |
| 3             | 6             | 0           | -0.000000               | -1.437364 | -0.717871 |
| 4             | 6             | 0           | 0.000000                | 0.695817  | 0.452990  |
| 5             | 6             | 0           | 0.000000                | 0.699930  | -1.909293 |
| 6             | 6             | 0           | -0.000000               | -0.699930 | -1.909293 |
| 7             | 6             | 0           | -0.000000               | -0.695817 | 0.452990  |
| 8             | 1             | 0           | 0.000000                | 1.224243  | -2.860551 |
| 9             | 1             | 0           | -0.000000               | -1.224243 | -2.860551 |
| 10            | 1             | 0           | -0.000000               | -2.523299 | -0.733576 |
| 11            | 6             | 0           | 0.000000                | 0.785986  | 1.968854  |
| 12            | 1             | 0           | -0.889880               | 1.240635  | 2.413027  |
| 13            | 1             | 0           | 0.889880                | 1.240635  | 2.413027  |
| 14            | 6             | 0           | -0.000000               | -0.785986 | 1.968854  |
| 15            | 1             | 0           | -0.889880               | -1.240635 | 2.413027  |
| 16            | 1             | 0           | 0.889880                | -1.240635 | 2.413027  |

Zero-point correction= 0.136052  
(Hartree/Particle)  
Thermal correction to Energy= 0.142040  
Thermal correction to Enthalpy= 0.142984  
Thermal correction to Gibbs Free Energy= 0.106818  
Sum of electronic and zero-point Energies= -309.348713  
Sum of electronic and thermal Energies= -309.342725  
Sum of electronic and thermal Enthalpies= -309.341781  
Sum of electronic and thermal Free Energies= -309.377946

## Hexafluoroethane

CF<sub>3</sub>-CF<sub>3</sub>

| Center Number | Atomic Number | Atomic Type | Coordinates (Angstroms) |           |           |
|---------------|---------------|-------------|-------------------------|-----------|-----------|
|               |               |             | X                       | Y         | Z         |
| 1             | 6             | 0           | 0.000000                | 0.000000  | 0.765543  |
| 2             | 6             | 0           | -0.000000               | -0.000000 | -0.765543 |
| 3             | 9             | 0           | 1.083323                | 0.625457  | -1.212162 |
| 4             | 9             | 0           | -1.083323               | 0.625457  | -1.212162 |
| 5             | 9             | 0           | 0.000000                | 1.250914  | 1.212162  |
| 6             | 9             | 0           | 1.083323                | -0.625457 | 1.212162  |
| 7             | 9             | 0           | -0.000000               | -1.250914 | -1.212162 |
| 8             | 9             | 0           | -1.083323               | -0.625457 | 1.212162  |

Zero-point correction= 0.030472  
 (Hartree/Particle)  
 Thermal correction to Energy= 0.037199  
 Thermal correction to Enthalpy= 0.038143  
 Thermal correction to Gibbs Free Energy= 0.000270  
 Sum of electronic and zero-point Energies= -675.008380  
 Sum of electronic and thermal Energies= -675.001653  
 Sum of electronic and thermal Enthalpies= -675.000708  
 Sum of electronic and thermal Free Energies= -675.038582

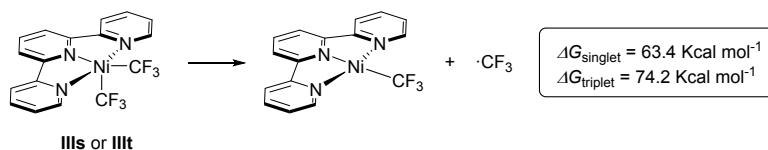

## TPY-Ni-CF<sub>3</sub>

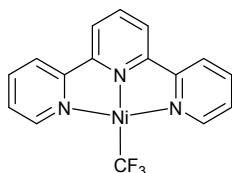

| Center Number | Atomic Number | Atomic Type | Coordinates (Angstroms) |           |           |
|---------------|---------------|-------------|-------------------------|-----------|-----------|
|               |               |             | X                       | Y         | Z         |
| 1             | 1             | 0           | -5.776056               | 0.494856  | 0.000653  |
| 2             | 6             | 0           | -4.718669               | 0.251115  | 0.000255  |
| 3             | 7             | 0           | -1.988121               | -0.402343 | -0.000648 |
| 4             | 6             | 0           | -3.776367               | 1.248337  | 0.000679  |
| 5             | 6             | 0           | -4.290874               | -1.095268 | -0.000695 |
| 6             | 6             | 0           | -2.938735               | -1.359833 | -0.001036 |
| 7             | 6             | 0           | -2.400945               | 0.923150  | 0.000111  |
| 8             | 1             | 0           | -4.072753               | 2.291929  | 0.001460  |
| 9             | 1             | 0           | -4.998196               | -1.915432 | -0.001191 |
| 10            | 1             | 0           | -2.573197               | -2.376570 | -0.001741 |
| 11            | 6             | 0           | -1.343958               | 1.877638  | 0.000164  |
| 12            | 6             | 0           | 1.003737                | 3.394002  | 0.000028  |
| 13            | 6             | 0           | -1.424540               | 3.286642  | -0.000012 |
| 14            | 7             | 0           | -0.107234               | 1.292453  | 0.000323  |



|    |    |   |           |           |           |
|----|----|---|-----------|-----------|-----------|
| 15 | 6  | 0 | 1.030164  | 2.018680  | 0.000135  |
| 16 | 6  | 0 | -0.266227 | 4.032258  | -0.000041 |
| 17 | 1  | 0 | -2.391455 | 3.778727  | -0.000215 |
| 18 | 1  | 0 | -0.319508 | 5.115275  | -0.000216 |
| 19 | 1  | 0 | 1.914236  | 3.980499  | -0.000034 |
| 20 | 6  | 0 | 2.225686  | 1.156304  | 0.000042  |
| 21 | 6  | 0 | 4.313569  | -0.621341 | -0.000486 |
| 22 | 6  | 0 | 3.531020  | 1.640785  | 0.000400  |
| 23 | 7  | 0 | 1.960359  | -0.178580 | -0.000472 |
| 24 | 6  | 0 | 2.990171  | -1.037731 | -0.000761 |
| 25 | 6  | 0 | 4.589074  | 0.743125  | 0.000139  |
| 26 | 1  | 0 | 3.710017  | 2.709449  | 0.000879  |
| 27 | 1  | 0 | 2.738450  | -2.088349 | -0.001253 |
| 28 | 1  | 0 | 5.612318  | 1.103080  | 0.000401  |
| 29 | 1  | 0 | 5.105995  | -1.360084 | -0.000776 |
| 30 | 28 | 0 | -0.015654 | -0.597329 | -0.000239 |
| 31 | 6  | 0 | 0.221177  | -2.537102 | 0.000458  |
| 32 | 9  | 0 | 0.969830  | -2.936982 | 1.083176  |
| 33 | 9  | 0 | -0.830999 | -3.404252 | 0.001480  |
| 34 | 9  | 0 | 0.968692  | -2.938039 | -1.082652 |

```

-----
Zero-point correction=                0.245900
(Hartree/Particle)
Thermal correction to Energy=         0.263335
Thermal correction to Enthalpy=       0.264279
Thermal correction to Gibbs Free Energy= 0.200478
Sum of electronic and zero-point Energies= -1248.797131
Sum of electronic and thermal Energies= -1248.779696
Sum of electronic and thermal Enthalpies= -1248.778752
Sum of electronic and thermal Free Energies= -1248.842553

```

**•CF<sub>3</sub>**

| Center<br>Number | Atomic<br>Number | Atomic<br>Type | Coordinates (Angstroms) |           |          |
|------------------|------------------|----------------|-------------------------|-----------|----------|
|                  |                  |                | X                       | Y         | Z        |
| 1                | 6                | 0              | 0.000000                | 0.000000  | 0.000000 |
| 2                | 9                | 0              | 0.000000                | 1.311603  | 0.000000 |
| 3                | 9                | 0              | 1.135882                | -0.655802 | 0.000000 |
| 4                | 9                | 0              | -1.135882               | -0.655802 | 0.000000 |

```

-----
Zero-point correction=                0.011096
(Hartree/Particle)
Thermal correction to Energy=         0.014473
Thermal correction to Enthalpy=       0.015417
Thermal correction to Gibbs Free Energy= -0.013999
Sum of electronic and zero-point Energies= -337.383031
Sum of electronic and thermal Energies= -337.379653
Sum of electronic and thermal Enthalpies= -337.378709
Sum of electronic and thermal Free Energies= -337.408125

```

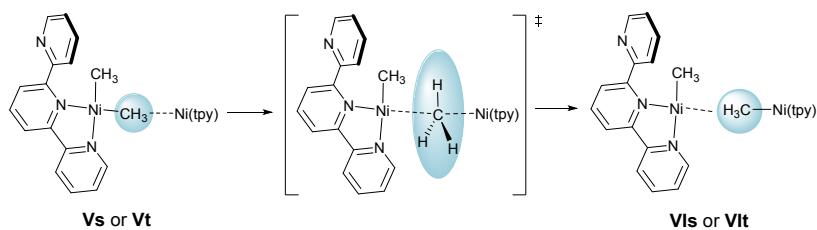

|              | <b>Vs</b> | <b>Vt</b> |
|--------------|-----------|-----------|
| $\Delta G_a$ | 5.84      | 11.7      |
| $\Delta G$   | 5.80      | -11.7     |

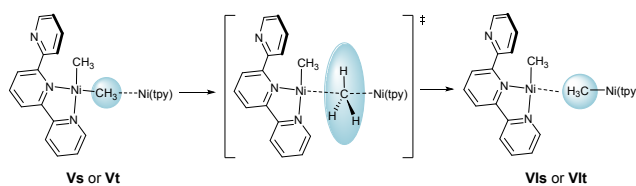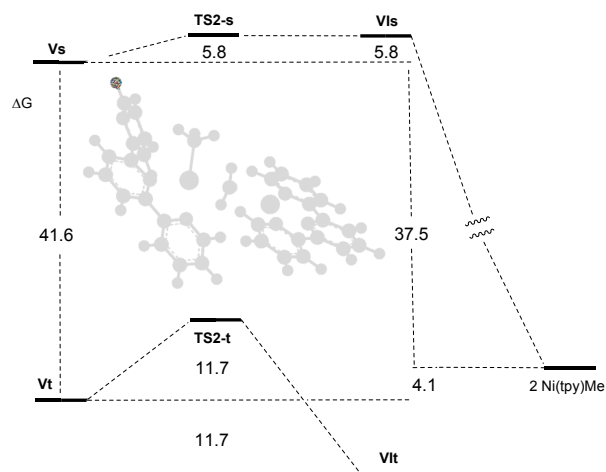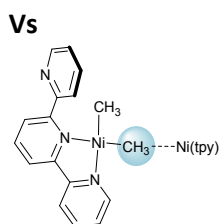

| Center Number | Atomic Number | Atomic Type | Coordinates (Angstroms) |           |           |
|---------------|---------------|-------------|-------------------------|-----------|-----------|
|               |               |             | X                       | Y         | Z         |
| 1             | 6             | 0           | 5.201680                | -1.417778 | -1.584195 |
| 2             | 6             | 0           | 6.588289                | -1.325798 | -1.626885 |
| 3             | 6             | 0           | 7.213762                | -0.378716 | -0.825898 |
| 4             | 7             | 0           | 4.451956                | -0.642740 | -0.797366 |
| 5             | 6             | 0           | 6.437412                | 0.431708  | -0.004862 |
| 6             | 6             | 0           | 5.053464                | 0.271490  | -0.012518 |
| 7             | 6             | 0           | 4.146702                | 1.040360  | 0.880870  |
| 8             | 7             | 0           | 2.885585                | 0.571527  | 0.949288  |
| 9             | 6             | 0           | 4.570093                | 2.136306  | 1.627093  |
| 10            | 6             | 0           | 3.662955                | 2.742348  | 2.490458  |
| 11            | 6             | 0           | 2.040723                | 1.095846  | 1.849463  |

|    |    |   |           |           |           |
|----|----|---|-----------|-----------|-----------|
| 12 | 6  | 0 | 2.392770  | 2.203780  | 2.625351  |
| 13 | 6  | 0 | 0.732753  | 0.425411  | 2.084455  |
| 14 | 6  | 0 | 0.626732  | -0.964969 | 2.019242  |
| 15 | 7  | 0 | -0.286235 | 1.224354  | 2.426988  |
| 16 | 6  | 0 | -0.601730 | -1.550745 | 2.312939  |
| 17 | 6  | 0 | -1.460756 | 0.649153  | 2.684446  |
| 18 | 6  | 0 | -1.669383 | -0.729048 | 2.649227  |
| 19 | 28 | 0 | 2.424782  | -0.429270 | -0.848628 |
| 20 | 6  | 0 | 2.218652  | -1.488003 | -2.464950 |
| 21 | 6  | 0 | 0.544369  | 0.205026  | -1.006901 |
| 22 | 1  | 0 | 4.664903  | -2.128254 | -2.202312 |
| 23 | 1  | 0 | 7.154713  | -1.982886 | -2.275871 |
| 24 | 1  | 0 | 8.293318  | -0.273287 | -0.830931 |
| 25 | 1  | 0 | 6.907297  | 1.161779  | 0.642379  |
| 26 | 1  | 0 | 5.577349  | 2.521942  | 1.531380  |
| 27 | 1  | 0 | 3.958435  | 3.608546  | 3.072706  |
| 28 | 1  | 0 | 1.668615  | 2.607155  | 3.322254  |
| 29 | 1  | 0 | 1.488752  | -1.563256 | 1.740854  |
| 30 | 1  | 0 | -0.729311 | -2.628214 | 2.251577  |
| 31 | 1  | 0 | -2.279902 | 1.321011  | 2.928575  |
| 32 | 1  | 0 | -2.654703 | -1.138282 | 2.845681  |
| 33 | 1  | 0 | 1.197753  | -1.557715 | -2.853740 |
| 34 | 1  | 0 | 2.565939  | -2.511021 | -2.247086 |
| 35 | 1  | 0 | 2.856221  | -1.080291 | -3.263058 |
| 36 | 1  | 0 | 0.400761  | 1.129630  | -0.439133 |
| 37 | 1  | 0 | 0.272615  | 0.304907  | -2.060724 |
| 38 | 1  | 0 | 0.094667  | -0.661438 | -0.506654 |
| 39 | 6  | 0 | -0.964490 | -2.924772 | -0.666202 |
| 40 | 6  | 0 | -1.091496 | -4.216018 | -0.219225 |
| 41 | 6  | 0 | -2.291612 | -4.588278 | 0.448585  |
| 42 | 7  | 0 | -1.930820 | -1.980542 | -0.539581 |
| 43 | 6  | 0 | -3.280072 | -3.654967 | 0.609419  |
| 44 | 6  | 0 | -3.112905 | -2.340164 | 0.098022  |
| 45 | 6  | 0 | -4.051869 | -1.282556 | 0.201063  |
| 46 | 7  | 0 | -3.475517 | -0.025326 | -0.008723 |
| 47 | 6  | 0 | -5.427659 | -1.384100 | 0.410692  |
| 48 | 6  | 0 | -6.241477 | -0.262860 | 0.281063  |
| 49 | 6  | 0 | -4.306455 | 1.035541  | -0.338625 |
| 50 | 6  | 0 | -5.669057 | 0.954560  | -0.154006 |
| 51 | 6  | 0 | -3.571469 | 2.153126  | -0.879230 |
| 52 | 6  | 0 | -4.057713 | 3.468554  | -1.001064 |
| 53 | 7  | 0 | -2.289428 | 1.838104  | -1.257610 |
| 54 | 6  | 0 | -3.250199 | 4.449978  | -1.531467 |
| 55 | 6  | 0 | -1.510422 | 2.818516  | -1.759074 |
| 56 | 6  | 0 | -1.938369 | 4.117814  | -1.924739 |
| 57 | 28 | 0 | -1.768605 | -0.027765 | -0.761462 |
| 58 | 1  | 0 | -0.055758 | -2.600412 | -1.169672 |
| 59 | 1  | 0 | -0.292216 | -4.929192 | -0.383094 |
| 60 | 1  | 0 | -2.414673 | -5.593894 | 0.838027  |
| 61 | 1  | 0 | -4.193439 | -3.897797 | 1.144131  |
| 62 | 1  | 0 | -5.867944 | -2.356428 | 0.615941  |
| 63 | 1  | 0 | -7.314568 | -0.344906 | 0.410267  |
| 64 | 1  | 0 | -6.302435 | 1.807237  | -0.379786 |
| 65 | 1  | 0 | -5.063815 | 3.696838  | -0.665143 |
| 66 | 1  | 0 | -3.616556 | 5.466105  | -1.635089 |
| 67 | 1  | 0 | -0.505963 | 2.520020  | -2.043262 |
| 68 | 1  | 0 | -1.271130 | 4.856982  | -2.351960 |

---

Zero-point correction= 0.536662  
(Hartree/Particle)  
Thermal correction to Energy= 0.571036

Thermal correction to Enthalpy= 0.571980  
 Thermal correction to Gibbs Free Energy= 0.471277  
 Sum of electronic and zero-point Energies= -1902.202286  
 Sum of electronic and thermal Energies= -1902.167912  
 Sum of electronic and thermal Enthalpies= -1902.166968  
 Sum of electronic and thermal Free Energies= -1902.267672

Vt

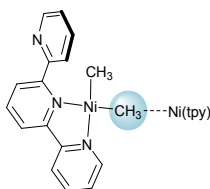

| Center Number | Atomic Number | Atomic Type | Coordinates (Angstroms) |           |           |
|---------------|---------------|-------------|-------------------------|-----------|-----------|
|               |               |             | X                       | Y         | Z         |
| 1             | 6             | 0           | -1.394236               | 1.063219  | 1.920361  |
| 2             | 6             | 0           | -2.339155               | 0.361356  | 2.640308  |
| 3             | 6             | 0           | -2.109515               | -1.021316 | 2.856437  |
| 4             | 7             | 0           | -0.261847               | 0.525721  | 1.435394  |
| 5             | 6             | 0           | -0.950636               | -1.590928 | 2.396273  |
| 6             | 6             | 0           | 0.007804                | -0.800496 | 1.704405  |
| 7             | 6             | 0           | 1.297207                | -1.262491 | 1.298960  |
| 8             | 7             | 0           | 2.165871                | -0.294426 | 0.832796  |
| 9             | 6             | 0           | 1.708103                | -2.617742 | 1.383139  |
| 10            | 6             | 0           | 2.988958                | -2.967225 | 1.040226  |
| 11            | 6             | 0           | 3.449273                | -0.647141 | 0.608177  |
| 12            | 6             | 0           | 3.899764                | -1.955515 | 0.666898  |
| 13            | 6             | 0           | 4.450620                | 0.441204  | 0.424015  |
| 14            | 6             | 0           | 4.304188                | 1.651236  | 1.110718  |
| 15            | 7             | 0           | 5.510087                | 0.174050  | -0.350459 |
| 16            | 6             | 0           | 5.283465                | 2.624567  | 0.966774  |
| 17            | 6             | 0           | 6.438239                | 1.122967  | -0.485977 |
| 18            | 6             | 0           | 6.375013                | 2.363173  | 0.143189  |
| 19            | 28            | 0           | 1.078366                | 1.295338  | 0.083765  |
| 20            | 6             | 0           | -0.128814               | 2.771382  | -0.617191 |
| 21            | 6             | 0           | 2.342864                | 1.840996  | -1.334748 |
| 22            | 1             | 0           | -1.543389               | 2.114884  | 1.693573  |
| 23            | 1             | 0           | -3.230720               | 0.857867  | 3.005345  |
| 24            | 1             | 0           | -2.837782               | -1.623272 | 3.391953  |
| 25            | 1             | 0           | -0.753115               | -2.642017 | 2.578416  |
| 26            | 1             | 0           | 1.000373                | -3.376449 | 1.699719  |
| 27            | 1             | 0           | 3.307535                | -4.004331 | 1.084955  |
| 28            | 1             | 0           | 4.943826                | -2.165060 | 0.471929  |
| 29            | 1             | 0           | 3.428607                | 1.811263  | 1.730544  |
| 30            | 1             | 0           | 5.196477                | 3.573599  | 1.487297  |
| 31            | 1             | 0           | 7.279629                | 0.878398  | -1.130825 |
| 32            | 1             | 0           | 7.161012                | 3.095119  | -0.005620 |
| 33            | 1             | 0           | 0.607149                | 3.570732  | -0.759318 |
| 34            | 1             | 0           | -0.892651               | 3.149130  | 0.075125  |
| 35            | 1             | 0           | -0.607147               | 2.692708  | -1.618878 |
| 36            | 1             | 0           | 1.804968                | 2.102142  | -2.257987 |
| 37            | 1             | 0           | 3.086009                | 1.069583  | -1.577926 |
| 38            | 1             | 0           | 2.892688                | 2.738955  | -1.016877 |
| 39            | 6             | 0           | -3.553399               | 2.953544  | -0.767535 |
| 40            | 6             | 0           | -4.810043               | 3.450612  | -0.434120 |

|    |    |   |           |           |           |
|----|----|---|-----------|-----------|-----------|
| 41 | 6  | 0 | -5.768120 | 2.557887  | 0.031005  |
| 42 | 7  | 0 | -3.227582 | 1.664622  | -0.661034 |
| 43 | 6  | 0 | -5.438913 | 1.211277  | 0.139115  |
| 44 | 6  | 0 | -4.156702 | 0.795725  | -0.217249 |
| 45 | 6  | 0 | -3.735314 | -0.633486 | -0.154406 |
| 46 | 7  | 0 | -2.537214 | -0.879669 | -0.683920 |
| 47 | 6  | 0 | -4.497939 | -1.658738 | 0.404222  |
| 48 | 6  | 0 | -3.970509 | -2.946598 | 0.395683  |
| 49 | 6  | 0 | -2.013037 | -2.107383 | -0.694085 |
| 50 | 6  | 0 | -2.718113 | -3.186796 | -0.158559 |
| 51 | 6  | 0 | -0.653020 | -2.195492 | -1.291170 |
| 52 | 6  | 0 | 0.027673  | -3.405164 | -1.426334 |
| 53 | 7  | 0 | -0.116111 | -1.026860 | -1.702236 |
| 54 | 6  | 0 | 1.301047  | -3.405602 | -1.983214 |
| 55 | 6  | 0 | 1.098510  | -1.041683 | -2.252138 |
| 56 | 6  | 0 | 1.850253  | -2.203496 | -2.412048 |
| 57 | 28 | 0 | -1.285907 | 0.720681  | -1.098177 |
| 58 | 1  | 0 | -2.767766 | 3.611025  | -1.128000 |
| 59 | 1  | 0 | -5.022068 | 4.508042  | -0.540147 |
| 60 | 1  | 0 | -6.761473 | 2.900008  | 0.301698  |
| 61 | 1  | 0 | -6.176284 | 0.497482  | 0.486381  |
| 62 | 1  | 0 | -5.466884 | -1.469469 | 0.850036  |
| 63 | 1  | 0 | -4.536317 | -3.765464 | 0.827664  |
| 64 | 1  | 0 | -2.305171 | -4.188221 | -0.156023 |
| 65 | 1  | 0 | -0.420402 | -4.334208 | -1.094047 |
| 66 | 1  | 0 | 1.852374  | -4.335330 | -2.080629 |
| 67 | 1  | 0 | 1.486912  | -0.079071 | -2.563161 |
| 68 | 1  | 0 | 2.839215  | -2.151762 | -2.852244 |

-----

Zero-point correction= 0.535748  
(Hartree/Particle)  
Thermal correction to Energy= 0.570434  
Thermal correction to Enthalpy= 0.571378  
Thermal correction to Gibbs Free Energy= 0.470533  
Sum of electronic and zero-point Energies= -1902.268741  
Sum of electronic and thermal Energies= -1902.234055  
Sum of electronic and thermal Enthalpies= -1902.233111  
Sum of electronic and thermal Free Energies= -1902.333956

### Vis

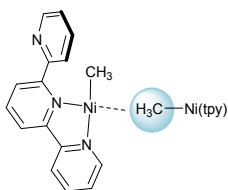

-----

| Center Number | Atomic Number | Atomic Type | Coordinates (Angstroms) |           |           |
|---------------|---------------|-------------|-------------------------|-----------|-----------|
|               |               |             | X                       | Y         | Z         |
| 1             | 6             | 0           | 0.103676                | -2.076845 | -1.064538 |
| 2             | 6             | 0           | -0.213353               | -3.115265 | -1.934377 |
| 3             | 6             | 0           | 0.765019                | -3.567983 | -2.809898 |
| 4             | 7             | 0           | 1.314597                | -1.514327 | -1.033309 |
| 5             | 6             | 0           | 2.026956                | -2.981939 | -2.781245 |
| 6             | 6             | 0           | 2.271852                | -1.956312 | -1.872542 |
| 7             | 6             | 0           | 3.603935                | -1.318805 | -1.701000 |
| 8             | 7             | 0           | 3.696731                | -0.452419 | -0.670642 |
| 9             | 6             | 0           | 4.703266                | -1.629854 | -2.495284 |
| 10            | 6             | 0           | 5.931874                | -1.051361 | -2.193855 |
| 11            | 6             | 0           | 4.900626                | 0.021414  | -0.315273 |

|    |    |   |           |           |           |
|----|----|---|-----------|-----------|-----------|
| 12 | 6  | 0 | 6.041868  | -0.239140 | -1.075597 |
| 13 | 6  | 0 | 5.024199  | 0.756024  | 0.971400  |
| 14 | 6  | 0 | 4.260753  | 0.370444  | 2.075558  |
| 15 | 7  | 0 | 5.938342  | 1.730867  | 1.014039  |
| 16 | 6  | 0 | 4.432182  | 1.059692  | 3.270144  |
| 17 | 6  | 0 | 6.084828  | 2.388903  | 2.164163  |
| 18 | 6  | 0 | 5.354715  | 2.099395  | 3.315881  |
| 19 | 28 | 0 | 1.860792  | 0.272452  | -0.156098 |
| 20 | 6  | 0 | -0.181396 | 0.675378  | 0.537672  |
| 21 | 6  | 0 | 2.394734  | 2.102094  | 0.164881  |
| 22 | 1  | 0 | -0.640651 | -1.677067 | -0.379897 |
| 23 | 1  | 0 | -1.207911 | -3.544962 | -1.917658 |
| 24 | 1  | 0 | 0.556265  | -4.371768 | -3.507734 |
| 25 | 1  | 0 | 2.802345  | -3.331120 | -3.451452 |
| 26 | 1  | 0 | 4.610948  | -2.308286 | -3.333716 |
| 27 | 1  | 0 | 6.800535  | -1.267577 | -2.806360 |
| 28 | 1  | 0 | 6.987443  | 0.184913  | -0.760480 |
| 29 | 1  | 0 | 3.555930  | -0.450678 | 1.993181  |
| 30 | 1  | 0 | 3.856462  | 0.788001  | 4.148868  |
| 31 | 1  | 0 | 6.824147  | 3.186061  | 2.168187  |
| 32 | 1  | 0 | 5.519196  | 2.669059  | 4.223523  |
| 33 | 1  | 0 | 0.052838  | 1.584585  | 1.083122  |
| 34 | 1  | 0 | 0.134454  | -0.241205 | 1.034377  |
| 35 | 1  | 0 | -0.088307 | 0.738840  | -0.557442 |
| 36 | 1  | 0 | 1.651021  | 2.760602  | -0.300351 |
| 37 | 1  | 0 | 3.372397  | 2.312999  | -0.284322 |
| 38 | 1  | 0 | 2.441914  | 2.333216  | 1.234904  |
| 39 | 6  | 0 | -1.591687 | -1.937593 | 2.200659  |
| 40 | 6  | 0 | -1.846147 | -3.145693 | 2.795979  |
| 41 | 6  | 0 | -3.141867 | -3.719936 | 2.636501  |
| 42 | 7  | 0 | -2.493933 | -1.229973 | 1.476110  |
| 43 | 6  | 0 | -4.083424 | -3.037363 | 1.920215  |
| 44 | 6  | 0 | -3.780931 | -1.767974 | 1.350046  |
| 45 | 6  | 0 | -4.663795 | -0.969406 | 0.599090  |
| 46 | 7  | 0 | -4.010995 | 0.070409  | -0.078281 |
| 47 | 6  | 0 | -6.052865 | -1.089410 | 0.487412  |
| 48 | 6  | 0 | -6.791699 | -0.117287 | -0.173792 |
| 49 | 6  | 0 | -4.765029 | 1.130110  | -0.555816 |
| 50 | 6  | 0 | -6.133519 | 1.042646  | -0.658021 |
| 51 | 6  | 0 | -3.947183 | 2.265707  | -0.905912 |
| 52 | 6  | 0 | -4.366395 | 3.380602  | -1.656286 |
| 53 | 7  | 0 | -2.648883 | 2.162019  | -0.467081 |
| 54 | 6  | 0 | -3.479436 | 4.399085  | -1.924873 |
| 55 | 6  | 0 | -1.794356 | 3.166673  | -0.749377 |
| 56 | 6  | 0 | -2.154638 | 4.294393  | -1.454177 |
| 57 | 28 | 0 | -2.239710 | 0.419935  | 0.407875  |
| 58 | 1  | 0 | -0.615075 | -1.475953 | 2.314604  |
| 59 | 1  | 0 | -1.076293 | -3.636469 | 3.379545  |
| 60 | 1  | 0 | -3.372822 | -4.686318 | 3.073894  |
| 61 | 1  | 0 | -5.073968 | -3.455723 | 1.767481  |
| 62 | 1  | 0 | -6.559525 | -1.922459 | 0.967854  |
| 63 | 1  | 0 | -7.871226 | -0.195356 | -0.235656 |
| 64 | 1  | 0 | -6.708973 | 1.867834  | -1.066606 |
| 65 | 1  | 0 | -5.387747 | 3.422833  | -2.019694 |
| 66 | 1  | 0 | -3.793858 | 5.266162  | -2.496544 |
| 67 | 1  | 0 | -0.782366 | 3.040035  | -0.377526 |
| 68 | 1  | 0 | -1.425049 | 5.074577  | -1.636112 |

---

Zero-point correction= 0.535168  
(Hartree/Particle)  
Thermal correction to Energy= 0.570036

Thermal correction to Enthalpy= 0.570980  
 Thermal correction to Gibbs Free Energy= 0.467088  
 Sum of electronic and zero-point Energies= -1902.190282  
 Sum of electronic and thermal Energies= -1902.155414  
 Sum of electronic and thermal Enthalpies= -1902.154470  
 Sum of electronic and thermal Free Energies= -1902.258362

Vit

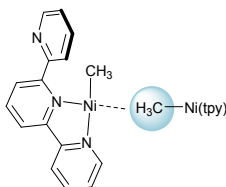

| Center Number | Atomic Number | Atomic Type | Coordinates (Angstroms) |           |           |
|---------------|---------------|-------------|-------------------------|-----------|-----------|
|               |               |             | X                       | Y         | Z         |
| 1             | 6             | 0           | -1.506061               | 1.008778  | 1.883151  |
| 2             | 6             | 0           | -2.634994               | 0.333550  | 2.337804  |
| 3             | 6             | 0           | -2.557542               | -1.045139 | 2.498090  |
| 4             | 7             | 0           | -0.357885               | 0.384208  | 1.606313  |
| 5             | 6             | 0           | -1.368368               | -1.699252 | 2.194565  |
| 6             | 6             | 0           | -0.282142               | -0.947393 | 1.742783  |
| 7             | 6             | 0           | 1.023093                | -1.558227 | 1.363916  |
| 8             | 7             | 0           | 2.032977                | -0.701255 | 1.123017  |
| 9             | 6             | 0           | 1.171475                | -2.938665 | 1.231129  |
| 10            | 6             | 0           | 2.405675                | -3.447613 | 0.844585  |
| 11            | 6             | 0           | 3.222595                | -1.195324 | 0.752673  |
| 12            | 6             | 0           | 3.446672                | -2.567344 | 0.598802  |
| 13            | 6             | 0           | 4.337385                | -0.248005 | 0.469722  |
| 14            | 6             | 0           | 4.474703                | 0.953532  | 1.164504  |
| 15            | 7             | 0           | 5.195705                | -0.643372 | -0.481749 |
| 16            | 6             | 0           | 5.526370                | 1.799226  | 0.823119  |
| 17            | 6             | 0           | 6.199055                | 0.174584  | -0.795167 |
| 18            | 6             | 0           | 6.403467                | 1.410242  | -0.182201 |
| 19            | 28            | 0           | 1.373284                | 1.401508  | 1.012531  |
| 20            | 6             | 0           | -1.543306               | 3.415223  | -1.140698 |
| 21            | 6             | 0           | 2.214415                | 3.249195  | 0.661505  |
| 22            | 1             | 0           | -1.510468               | 2.083289  | 1.723839  |
| 23            | 1             | 0           | -3.551066               | 0.878295  | 2.541685  |
| 24            | 1             | 0           | -3.416159               | -1.610965 | 2.846646  |
| 25            | 1             | 0           | -1.293937               | -2.772472 | 2.321492  |
| 26            | 1             | 0           | 0.338208                | -3.607679 | 1.407394  |
| 27            | 1             | 0           | 2.547491                | -4.517772 | 0.733684  |
| 28            | 1             | 0           | 4.425123                | -2.907727 | 0.283921  |
| 29            | 1             | 0           | 3.766741                | 1.222381  | 1.939671  |
| 30            | 1             | 0           | 5.653187                | 2.746734  | 1.336954  |
| 31            | 1             | 0           | 6.873765                | -0.171453 | -1.574678 |
| 32            | 1             | 0           | 7.233716                | 2.038980  | -0.483784 |
| 33            | 1             | 0           | -2.311489               | 3.932551  | -1.745370 |
| 34            | 1             | 0           | -1.657098               | 3.827274  | -0.120728 |
| 35            | 1             | 0           | -0.577348               | 3.809273  | -1.499502 |
| 36            | 1             | 0           | 1.473630                | 4.015340  | 0.387614  |
| 37            | 1             | 0           | 2.918474                | 3.178484  | -0.183339 |
| 38            | 1             | 0           | 2.789682                | 3.652040  | 1.511103  |
| 39            | 6             | 0           | -4.695021               | 2.047187  | -0.199721 |

|    |    |   |           |           |           |
|----|----|---|-----------|-----------|-----------|
| 40 | 6  | 0 | -5.944165 | 1.833608  | 0.380211  |
| 41 | 6  | 0 | -6.355034 | 0.521449  | 0.588921  |
| 42 | 7  | 0 | -3.888055 | 1.050971  | -0.555965 |
| 43 | 6  | 0 | -5.511834 | -0.522371 | 0.219053  |
| 44 | 6  | 0 | -4.277398 | -0.215580 | -0.353166 |
| 45 | 6  | 0 | -3.269759 | -1.254273 | -0.717562 |
| 46 | 7  | 0 | -2.073595 | -0.778558 | -1.078775 |
| 47 | 6  | 0 | -3.518652 | -2.626575 | -0.655132 |
| 48 | 6  | 0 | -2.482933 | -3.502045 | -0.960631 |
| 49 | 6  | 0 | -1.072334 | -1.612658 | -1.380693 |
| 50 | 6  | 0 | -1.239004 | -2.998109 | -1.322192 |
| 51 | 6  | 0 | 0.214680  | -0.951645 | -1.744861 |
| 52 | 6  | 0 | 1.368754  | -1.663205 | -2.074880 |
| 53 | 7  | 0 | 0.196415  | 0.387998  | -1.703152 |
| 54 | 6  | 0 | 2.535752  | -0.954012 | -2.343957 |
| 55 | 6  | 0 | 1.317203  | 1.064651  | -1.954557 |
| 56 | 6  | 0 | 2.518182  | 0.434424  | -2.275090 |
| 57 | 28 | 0 | -1.733328 | 1.325349  | -1.139886 |
| 58 | 1  | 0 | -4.307399 | 3.046618  | -0.382124 |
| 59 | 1  | 0 | -6.568732 | 2.673841  | 0.660701  |
| 60 | 1  | 0 | -7.318261 | 0.309186  | 1.041297  |
| 61 | 1  | 0 | -5.811792 | -1.549304 | 0.392371  |
| 62 | 1  | 0 | -4.492803 | -3.010439 | -0.377414 |
| 63 | 1  | 0 | -2.645098 | -4.573920 | -0.917413 |
| 64 | 1  | 0 | -0.422834 | -3.672162 | -1.553391 |
| 65 | 1  | 0 | 1.371466  | -2.746314 | -2.111997 |
| 66 | 1  | 0 | 3.456786  | -1.481136 | -2.570971 |
| 67 | 1  | 0 | 1.238341  | 2.145719  | -1.883315 |
| 68 | 1  | 0 | 3.414614  | 1.020135  | -2.450394 |

-----

Zero-point correction= 0.533906  
(Hartree/Particle)  
Thermal correction to Energy= 0.570328  
Thermal correction to Enthalpy= 0.571272  
Thermal correction to Gibbs Free Energy= 0.465028  
Sum of electronic and zero-point Energies= -1902.283718  
Sum of electronic and thermal Energies= -1902.247296  
Sum of electronic and thermal Enthalpies= -1902.246352  
Sum of electronic and thermal Free Energies= -1902.352596

### TS-2s

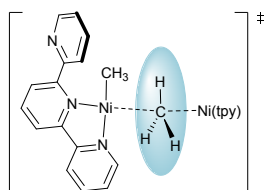

Imaginary frequency =  $-214.3429\text{cm}^{-1}$

-----

| Center Number | Atomic Number | Atomic Type | Coordinates (Angstroms) |          |           |
|---------------|---------------|-------------|-------------------------|----------|-----------|
|               |               |             | X                       | Y        | Z         |
| 1             | 6             | 0           | -0.146516               | 2.105709 | -1.118552 |
| 2             | 6             | 0           | 0.147041                | 3.130834 | -2.011883 |
| 3             | 6             | 0           | -0.847625               | 3.554068 | -2.883801 |
| 4             | 7             | 0           | -1.349070               | 1.527198 | -1.060543 |
| 5             | 6             | 0           | -2.101030               | 2.952813 | -2.827384 |
| 6             | 6             | 0           | -2.321577               | 1.941314 | -1.896350 |
| 7             | 6             | 0           | -3.644065               | 1.290475 | -1.700413 |



|    |    |   |           |           |           |
|----|----|---|-----------|-----------|-----------|
| 8  | 7  | 0 | -3.715835 | 0.441244  | -0.654736 |
| 9  | 6  | 0 | -4.754191 | 1.573421  | -2.490450 |
| 10 | 6  | 0 | -5.972499 | 0.984854  | -2.167575 |
| 11 | 6  | 0 | -4.909941 | -0.042961 | -0.281428 |
| 12 | 6  | 0 | -6.061659 | 0.190395  | -1.034831 |
| 13 | 6  | 0 | -5.012246 | -0.763131 | 1.015341  |
| 14 | 6  | 0 | -4.236247 | -0.363452 | 2.105561  |
| 15 | 7  | 0 | -5.921631 | -1.741436 | 1.080046  |
| 16 | 6  | 0 | -4.389347 | -1.041594 | 3.308998  |
| 17 | 6  | 0 | -6.050597 | -2.388630 | 2.238334  |
| 18 | 6  | 0 | -5.306743 | -2.084595 | 3.377384  |
| 19 | 28 | 0 | -1.860511 | -0.258459 | -0.150364 |
| 20 | 6  | 0 | 0.162723  | -0.631259 | 0.485720  |
| 21 | 6  | 0 | -2.369697 | -2.093433 | 0.196996  |
| 22 | 1  | 0 | 0.611642  | 1.729914  | -0.435601 |
| 23 | 1  | 0 | 1.136255  | 3.572928  | -2.016925 |
| 24 | 1  | 0 | -0.657913 | 4.345974  | -3.600339 |
| 25 | 1  | 0 | -2.889296 | 3.279369  | -3.493908 |
| 26 | 1  | 0 | -4.678393 | 2.236904  | -3.342367 |
| 27 | 1  | 0 | -6.849377 | 1.179273  | -2.775789 |
| 28 | 1  | 0 | -6.998652 | -0.241047 | -0.704587 |
| 29 | 1  | 0 | -3.535199 | 0.458869  | 2.005723  |
| 30 | 1  | 0 | -3.803327 | -0.759216 | 4.177495  |
| 31 | 1  | 0 | -6.786501 | -3.188662 | 2.259996  |
| 32 | 1  | 0 | -5.456432 | -2.645768 | 4.292838  |
| 33 | 1  | 0 | -0.024016 | -1.542509 | 1.041568  |
| 34 | 1  | 0 | -0.071652 | 0.301593  | 0.989358  |
| 35 | 1  | 0 | 0.151508  | -0.683058 | -0.608885 |
| 36 | 1  | 0 | -1.632735 | -2.753733 | -0.276731 |
| 37 | 1  | 0 | -3.355461 | -2.317629 | -0.228688 |
| 38 | 1  | 0 | -2.393430 | -2.317186 | 1.269677  |
| 39 | 6  | 0 | 1.619052  | 1.950270  | 2.199907  |
| 40 | 6  | 0 | 1.885702  | 3.150570  | 2.806816  |
| 41 | 6  | 0 | 3.186430  | 3.710996  | 2.656205  |
| 42 | 7  | 0 | 2.516839  | 1.239008  | 1.473972  |
| 43 | 6  | 0 | 4.123149  | 3.023018  | 1.937018  |
| 44 | 6  | 0 | 3.807143  | 1.762458  | 1.358226  |
| 45 | 6  | 0 | 4.687600  | 0.956677  | 0.606119  |
| 46 | 7  | 0 | 4.026371  | -0.060458 | -0.096043 |
| 47 | 6  | 0 | 6.077858  | 1.055050  | 0.524592  |
| 48 | 6  | 0 | 6.814805  | 0.076058  | -0.133480 |
| 49 | 6  | 0 | 4.773939  | -1.135212 | -0.559806 |
| 50 | 6  | 0 | 6.146661  | -1.067163 | -0.634821 |
| 51 | 6  | 0 | 3.948779  | -2.258258 | -0.920740 |
| 52 | 6  | 0 | 4.360816  | -3.373381 | -1.677386 |
| 53 | 7  | 0 | 2.647907  | -2.144599 | -0.489066 |
| 54 | 6  | 0 | 3.465747  | -4.380391 | -1.957432 |
| 55 | 6  | 0 | 1.784844  | -3.138462 | -0.785543 |
| 56 | 6  | 0 | 2.138084  | -4.265261 | -1.494324 |
| 57 | 28 | 0 | 2.250839  | -0.399273 | 0.382157  |
| 58 | 1  | 0 | 0.637048  | 1.498895  | 2.308073  |
| 59 | 1  | 0 | 1.119408  | 3.644980  | 3.391940  |
| 60 | 1  | 0 | 3.426962  | 4.671164  | 3.101879  |
| 61 | 1  | 0 | 5.118490  | 3.431368  | 1.789763  |
| 62 | 1  | 0 | 6.588146  | 1.873112  | 1.026242  |
| 63 | 1  | 0 | 7.896478  | 0.135419  | -0.171972 |
| 64 | 1  | 0 | 6.715590  | -1.901556 | -1.034214 |
| 65 | 1  | 0 | 5.383332  | -3.422594 | -2.036816 |
| 66 | 1  | 0 | 3.774619  | -5.246691 | -2.533348 |
| 67 | 1  | 0 | 0.771121  | -3.003785 | -0.420927 |
| 68 | 1  | 0 | 1.402158  | -5.037313 | -1.685175 |

```

-----
Zero-point correction=                0.534529
(Hartree/Particle)
Thermal correction to Energy=         0.568945
Thermal correction to Enthalpy=       0.569889
Thermal correction to Gibbs Free Energy= 0.466986
Sum of electronic and zero-point Energies= -1902.190885
Sum of electronic and thermal Energies= -1902.156469
Sum of electronic and thermal Enthalpies= -1902.155525
Sum of electronic and thermal Free Energies= -1902.258428

```

**TS-2t**

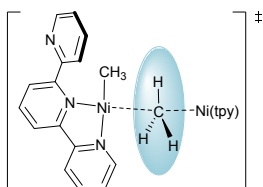

Imaginary frequency = -305.7761 cm<sup>-1</sup>

| Center Number | Atomic Number | Atomic Type | Coordinates (Angstroms) |           |           |
|---------------|---------------|-------------|-------------------------|-----------|-----------|
|               |               |             | X                       | Y         | Z         |
| 1             | 6             | 0           | 0.427926                | -2.147272 | 1.217206  |
| 2             | 6             | 0           | 0.224895                | -3.389386 | 1.780981  |
| 3             | 6             | 0           | 1.354579                | -4.224688 | 1.961150  |
| 4             | 7             | 0           | 1.625864                | -1.688245 | 0.818143  |
| 5             | 6             | 0           | 2.593923                | -3.772863 | 1.584621  |
| 6             | 6             | 0           | 2.737938                | -2.481592 | 1.008303  |
| 7             | 6             | 0           | 3.980500                | -1.907684 | 0.602603  |
| 8             | 7             | 0           | 3.929727                | -0.582313 | 0.210048  |
| 9             | 6             | 0           | 5.210739                | -2.613708 | 0.575657  |
| 10            | 6             | 0           | 6.365002                | -1.968703 | 0.213491  |
| 11            | 6             | 0           | 5.095673                | 0.055753  | -0.056784 |
| 12            | 6             | 0           | 6.317087                | -0.584113 | -0.082862 |
| 13            | 6             | 0           | 5.047806                | 1.535084  | -0.218612 |
| 14            | 6             | 0           | 4.152960                | 2.297194  | 0.541852  |
| 15            | 7             | 0           | 5.929547                | 2.088601  | -1.060813 |
| 16            | 6             | 0           | 4.159085                | 3.678045  | 0.399856  |
| 17            | 6             | 0           | 5.918122                | 3.416171  | -1.192439 |
| 18            | 6             | 0           | 5.054345                | 4.256807  | -0.495732 |
| 19            | 28            | 0           | 2.052602                | -0.023982 | -0.326920 |
| 20            | 6             | 0           | -0.069528               | 0.607875  | -0.423490 |
| 21            | 6             | 0           | 2.519839                | 1.031406  | -1.933975 |
| 22            | 1             | 0           | -0.411692               | -1.473434 | 1.050932  |
| 23            | 1             | 0           | -0.771239               | -3.704343 | 2.068850  |
| 24            | 1             | 0           | 1.245173                | -5.208885 | 2.406396  |
| 25            | 1             | 0           | 3.469146                | -4.393154 | 1.744828  |
| 26            | 1             | 0           | 5.231482                | -3.668264 | 0.828706  |
| 27            | 1             | 0           | 7.308227                | -2.504609 | 0.180449  |
| 28            | 1             | 0           | 7.211458                | -0.013556 | -0.299791 |
| 29            | 1             | 0           | 3.475667                | 1.802655  | 1.230074  |
| 30            | 1             | 0           | 3.478950                | 4.293735  | 0.980711  |
| 31            | 1             | 0           | 6.639203                | 3.831359  | -1.893103 |
| 32            | 1             | 0           | 5.092790                | 5.329855  | -0.647029 |
| 33            | 1             | 0           | 0.153656                | 1.537740  | -0.935651 |
| 34            | 1             | 0           | 0.055730                | 0.588742  | 0.660090  |
| 35            | 1             | 0           | 0.060683                | -0.313708 | -0.994809 |
| 36            | 1             | 0           | 1.790309                | 0.813372  | -2.726781 |
| 37            | 1             | 0           | 3.522172                | 0.777451  | -2.303543 |

|    |    |   |           |           |           |
|----|----|---|-----------|-----------|-----------|
| 38 | 1  | 0 | 2.492565  | 2.111796  | -1.740087 |
| 39 | 6  | 0 | -2.095945 | 3.451503  | 0.508265  |
| 40 | 6  | 0 | -2.578637 | 4.682987  | 0.944035  |
| 41 | 6  | 0 | -3.943785 | 4.810181  | 1.170412  |
| 42 | 7  | 0 | -2.885922 | 2.400525  | 0.298539  |
| 43 | 6  | 0 | -4.773494 | 3.713941  | 0.954238  |
| 44 | 6  | 0 | -4.206859 | 2.519067  | 0.513815  |
| 45 | 6  | 0 | -5.008338 | 1.286493  | 0.254617  |
| 46 | 7  | 0 | -4.291774 | 0.212794  | -0.091299 |
| 47 | 6  | 0 | -6.398607 | 1.223116  | 0.353105  |
| 48 | 6  | 0 | -7.025044 | 0.011809  | 0.081611  |
| 49 | 6  | 0 | -4.880461 | -0.957252 | -0.350475 |
| 50 | 6  | 0 | -6.267051 | -1.097859 | -0.275008 |
| 51 | 6  | 0 | -3.948398 | -2.061207 | -0.726728 |
| 52 | 6  | 0 | -4.379223 | -3.371925 | -0.921658 |
| 53 | 7  | 0 | -2.656849 | -1.710887 | -0.866514 |
| 54 | 6  | 0 | -3.447216 | -4.341477 | -1.279317 |
| 55 | 6  | 0 | -1.771921 | -2.643341 | -1.215888 |
| 56 | 6  | 0 | -2.116918 | -3.975003 | -1.434269 |
| 57 | 28 | 0 | -2.225101 | 0.402509  | -0.323187 |
| 58 | 1  | 0 | -1.038295 | 3.289889  | 0.318346  |
| 59 | 1  | 0 | -1.897782 | 5.511382  | 1.101067  |
| 60 | 1  | 0 | -4.362644 | 5.749918  | 1.514662  |
| 61 | 1  | 0 | -5.838846 | 3.796591  | 1.133008  |
| 62 | 1  | 0 | -6.985844 | 2.091191  | 0.625612  |
| 63 | 1  | 0 | -8.105090 | -0.066606 | 0.144242  |
| 64 | 1  | 0 | -6.753458 | -2.039865 | -0.495697 |
| 65 | 1  | 0 | -5.420145 | -3.642413 | -0.791667 |
| 66 | 1  | 0 | -3.761805 | -5.368363 | -1.433157 |
| 67 | 1  | 0 | -0.742203 | -2.311664 | -1.318938 |
| 68 | 1  | 0 | -1.356314 | -4.695043 | -1.712942 |

-----

Zero-point correction= 0.532892  
(Hartree/Particle)  
Thermal correction to Energy= 0.568613  
Thermal correction to Enthalpy= 0.569557  
Thermal correction to Gibbs Free Energy= 0.460824  
Sum of electronic and zero-point Energies= -1902.243289  
Sum of electronic and thermal Energies= -1902.207568  
Sum of electronic and thermal Enthalpies= -1902.206624  
Sum of electronic and thermal Free Energies= -1902.315357

### Ni(tpy)Me

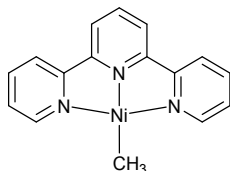

-----

| Center Number | Atomic Number | Atomic Type | Coordinates (Angstroms) |           |          |
|---------------|---------------|-------------|-------------------------|-----------|----------|
|               |               |             | X                       | Y         | Z        |
| 1             | 1             | 0           | 0.319158                | 0.044353  | 5.706655 |
| 2             | 6             | 0           | 0.023271                | 0.045697  | 4.662765 |
| 3             | 7             | 0           | -0.744582               | 0.034016  | 1.982939 |
| 4             | 6             | 0           | 0.979509                | -0.017440 | 3.668856 |
| 5             | 6             | 0           | -1.331627               | 0.114538  | 4.305706 |
| 6             | 6             | 0           | -1.660027               | 0.100653  | 2.962851 |
| 7             | 6             | 0           | 0.582270                | -0.010614 | 2.323425 |
| 8             | 1             | 0           | 2.033914                | -0.069968 | 3.916746 |

|    |    |   |           |           |           |
|----|----|---|-----------|-----------|-----------|
| 9  | 1  | 0 | -2.112714 | 0.177471  | 5.053676  |
| 10 | 1  | 0 | -2.692698 | 0.147503  | 2.635247  |
| 11 | 6  | 0 | 1.492806  | -0.036004 | 1.190176  |
| 12 | 6  | 0 | 2.879127  | 0.000050  | -1.214443 |
| 13 | 6  | 0 | 2.879127  | 0.000050  | 1.214443  |
| 14 | 7  | 0 | 0.829212  | -0.080801 | -0.000000 |
| 15 | 6  | 0 | 1.492806  | -0.036004 | -1.190176 |
| 16 | 6  | 0 | 3.579509  | 0.008067  | -0.000000 |
| 17 | 1  | 0 | 3.418529  | 0.032212  | 2.155338  |
| 18 | 1  | 0 | 4.662781  | 0.040503  | -0.000000 |
| 19 | 1  | 0 | 3.418529  | 0.032212  | -2.155338 |
| 20 | 6  | 0 | 0.582270  | -0.010614 | -2.323425 |
| 21 | 6  | 0 | -1.331627 | 0.114538  | -4.305706 |
| 22 | 6  | 0 | 0.979509  | -0.017440 | -3.668856 |
| 23 | 7  | 0 | -0.744582 | 0.034016  | -1.982939 |
| 24 | 6  | 0 | -1.660027 | 0.100653  | -2.962851 |
| 25 | 6  | 0 | 0.023271  | 0.045697  | -4.662765 |
| 26 | 1  | 0 | 2.033914  | -0.069968 | -3.916746 |
| 27 | 1  | 0 | -2.692698 | 0.147503  | -2.635247 |
| 28 | 1  | 0 | 0.319158  | 0.044353  | -5.706655 |
| 29 | 1  | 0 | -2.112714 | 0.177471  | -5.053676 |
| 30 | 28 | 0 | -1.085856 | -0.047257 | 0.000000  |
| 31 | 6  | 0 | -3.045969 | -0.180672 | 0.000000  |
| 32 | 1  | 0 | -3.424409 | -0.717960 | -0.879297 |
| 33 | 1  | 0 | -3.507877 | 0.817927  | 0.000000  |
| 34 | 1  | 0 | -3.424409 | -0.717960 | 0.879297  |

-----

|                                              |             |
|----------------------------------------------|-------------|
| Zero-point correction=                       | 0.264440    |
| (Hartree/Particle)                           |             |
| Thermal correction to Energy=                | 0.280045    |
| Thermal correction to Enthalpy=              | 0.280989    |
| Thermal correction to Gibbs Free Energy=     | 0.221245    |
| Sum of electronic and zero-point Energies=   | -951.120485 |
| Sum of electronic and thermal Energies=      | -951.104880 |
| Sum of electronic and thermal Enthalpies=    | -951.103936 |
| Sum of electronic and thermal Free Energies= | -951.163680 |

#### I.4. Atomic coordinates and energies for the stationary points in diisopropylether

IVs

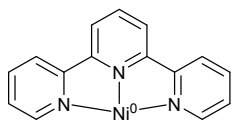

| Center Number | Atomic Number | Atomic Type | Coordinates (Angstroms) |           |           |
|---------------|---------------|-------------|-------------------------|-----------|-----------|
|               |               |             | X                       | Y         | Z         |
| 1             | 1             | 0           | -0.052871               | 0.208550  | 5.683245  |
| 2             | 6             | 0           | 0.217690                | 0.122138  | 4.635977  |
| 3             | 7             | 0           | 0.925991                | -0.130110 | 1.946678  |
| 4             | 6             | 0           | -0.751629               | 0.179643  | 3.658524  |
| 5             | 6             | 0           | 1.565422                | -0.026335 | 4.257713  |
| 6             | 6             | 0           | 1.862425                | -0.146341 | 2.917188  |
| 7             | 6             | 0           | -0.384860               | 0.068681  | 2.305220  |
| 8             | 1             | 0           | -1.793774               | 0.339024  | 3.914690  |
| 9             | 1             | 0           | 2.358445                | -0.067172 | 4.994935  |
| 10            | 1             | 0           | 2.883808                | -0.292691 | 2.577916  |
| 11            | 6             | 0           | -1.295071               | 0.149690  | 1.185592  |
| 12            | 6             | 0           | -2.642862               | -0.173739 | -1.203728 |
| 13            | 6             | 0           | -2.642862               | -0.173739 | 1.203728  |
| 14            | 7             | 0           | -0.653762               | 0.481890  | 0.000000  |
| 15            | 6             | 0           | -1.295071               | 0.149690  | -1.185592 |
| 16            | 6             | 0           | -3.349303               | -0.278484 | 0.000000  |
| 17            | 1             | 0           | -3.131740               | -0.397678 | 2.147272  |
| 18            | 1             | 0           | -4.398727               | -0.548660 | 0.000000  |
| 19            | 1             | 0           | -3.131740               | -0.397678 | -2.147272 |
| 20            | 6             | 0           | -0.384860               | 0.068681  | -2.305220 |
| 21            | 6             | 0           | 1.565422                | -0.026335 | -4.257713 |
| 22            | 6             | 0           | -0.751629               | 0.179643  | -3.658524 |
| 23            | 7             | 0           | 0.925991                | -0.130110 | -1.946678 |
| 24            | 6             | 0           | 1.862425                | -0.146341 | -2.917188 |
| 25            | 6             | 0           | 0.217690                | 0.122138  | -4.635977 |
| 26            | 1             | 0           | -1.793774               | 0.339024  | -3.914690 |
| 27            | 1             | 0           | 2.883808                | -0.292691 | -2.577916 |
| 28            | 1             | 0           | -0.052871               | 0.208550  | -5.683245 |
| 29            | 1             | 0           | 2.358445                | -0.067172 | -4.994935 |
| 30            | 28            | 0           | 1.168782                | -0.035608 | -0.000000 |

Zero-point correction= 0.229418  
(Hartree/Particle)  
Thermal correction to Energy= 0.243551  
Thermal correction to Enthalpy= 0.244496  
Thermal correction to Gibbs Free Energy= 0.188295  
Sum of electronic and zero-point Energies= -911.232594  
Sum of electronic and thermal Energies= -911.218461  
Sum of electronic and thermal Enthalpies= -911.217517  
Sum of electronic and thermal Free Energies= -911.273718

IVt

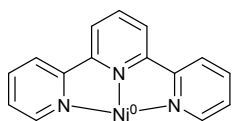

| Center Number | Atomic Number | Atomic Type | Coordinates (Angstroms) |           |           |
|---------------|---------------|-------------|-------------------------|-----------|-----------|
|               |               |             | X                       | Y         | Z         |
| 1             | 1             | 0           | 0.000457                | -0.258562 | 5.717467  |
| 2             | 6             | 0           | 0.000289                | 0.091154  | 4.689584  |
| 3             | 7             | 0           | -0.000028               | 0.981768  | 2.050921  |
| 4             | 6             | 0           | 0.000135                | -0.819152 | 3.649539  |
| 5             | 6             | 0           | 0.000289                | 1.461292  | 4.406458  |
| 6             | 6             | 0           | 0.000133                | 1.841627  | 3.070000  |
| 7             | 6             | 0           | -0.000063               | -0.364633 | 2.316418  |
| 8             | 1             | 0           | 0.000194                | -1.883723 | 3.852418  |
| 9             | 1             | 0           | 0.000374                | 2.209275  | 5.189839  |
| 10            | 1             | 0           | 0.000183                | 2.893868  | 2.797741  |
| 11            | 6             | 0           | -0.000256               | -1.281740 | 1.179325  |
| 12            | 6             | 0           | -0.000256               | -2.713728 | -1.222546 |
| 13            | 6             | 0           | -0.000256               | -2.713728 | 1.222546  |
| 14            | 7             | 0           | -0.000340               | -0.668880 | -0.000000 |
| 15            | 6             | 0           | -0.000256               | -1.281740 | -1.179325 |
| 16            | 6             | 0           | -0.000276               | -3.379806 | -0.000000 |
| 17            | 1             | 0           | -0.000298               | -3.262232 | 2.155564  |
| 18            | 1             | 0           | -0.000308               | -4.467324 | -0.000000 |
| 19            | 1             | 0           | -0.000298               | -3.262232 | -2.155564 |
| 20            | 6             | 0           | -0.000063               | -0.364633 | -2.316418 |
| 21            | 6             | 0           | 0.000289                | 1.461292  | -4.406458 |
| 22            | 6             | 0           | 0.000135                | -0.819152 | -3.649539 |
| 23            | 7             | 0           | -0.000028               | 0.981768  | -2.050921 |
| 24            | 6             | 0           | 0.000133                | 1.841627  | -3.070000 |
| 25            | 6             | 0           | 0.000289                | 0.091154  | -4.689584 |
| 26            | 1             | 0           | 0.000194                | -1.883723 | -3.852418 |
| 27            | 1             | 0           | 0.000183                | 2.893868  | -2.797741 |
| 28            | 1             | 0           | 0.000457                | -0.258562 | -5.717467 |
| 29            | 1             | 0           | 0.000374                | 2.209275  | -5.189839 |
| 30            | 28            | 0           | -0.000012               | 1.346731  | 0.000000  |

Zero-point correction= 0.232084  
(Hartree/Particle)  
Thermal correction to Energy= 0.246708  
Thermal correction to Enthalpy= 0.247652  
Thermal correction to Gibbs Free Energy= 0.189028  
Sum of electronic and zero-point Energies= -911.275525  
Sum of electronic and thermal Energies= -911.260902  
Sum of electronic and thermal Enthalpies= -911.259957  
Sum of electronic and thermal Free Energies= -911.318582

**Enyne**

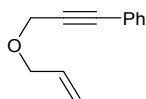

| Center Number | Atomic Number | Atomic Type | Coordinates (Angstroms) |           |           |
|---------------|---------------|-------------|-------------------------|-----------|-----------|
|               |               |             | X                       | Y         | Z         |
| 1             | 8             | 0           | 1.089725                | -2.994722 | 1.188470  |
| 2             | 6             | 0           | 1.664579                | -2.338326 | 0.077701  |
| 3             | 1             | 0           | 2.653612                | -1.933794 | 0.339332  |
| 4             | 1             | 0           | 1.810673                | -3.103183 | -0.691084 |
| 5             | 6             | 0           | 1.360035                | -2.361552 | 2.427811  |
| 6             | 1             | 0           | 2.446966                | -2.304478 | 2.595609  |

|    |   |   |           |           |           |
|----|---|---|-----------|-----------|-----------|
| 7  | 1 | 0 | 0.935202  | -3.034026 | 3.180388  |
| 8  | 6 | 0 | 0.821375  | -1.260337 | -0.466592 |
| 9  | 6 | 0 | 0.112252  | -0.390764 | -0.917185 |
| 10 | 6 | 0 | 0.755869  | -0.991072 | 2.557515  |
| 11 | 1 | 0 | -0.304670 | -0.912616 | 2.325040  |
| 12 | 6 | 0 | 1.445324  | 0.075346  | 2.952420  |
| 13 | 1 | 0 | 0.977549  | 1.047502  | 3.072319  |
| 14 | 1 | 0 | 2.507839  | 0.009858  | 3.176223  |
| 15 | 6 | 0 | -0.718811 | 0.664151  | -1.422230 |
| 16 | 6 | 0 | -2.339461 | 2.726562  | -2.388470 |
| 17 | 6 | 0 | -0.654866 | 1.942425  | -0.848745 |
| 18 | 6 | 0 | -1.603976 | 0.429827  | -2.483713 |
| 19 | 6 | 0 | -2.408017 | 1.457948  | -2.962198 |
| 20 | 6 | 0 | -1.462171 | 2.965719  | -1.331811 |
| 21 | 1 | 0 | 0.031819  | 2.118253  | -0.026612 |
| 22 | 1 | 0 | -1.653928 | -0.560765 | -2.924020 |
| 23 | 1 | 0 | -3.091915 | 1.268224  | -3.783446 |
| 24 | 1 | 0 | -1.406215 | 3.952437  | -0.882912 |
| 25 | 1 | 0 | -2.968789 | 3.527383  | -2.763809 |

```

-----
Zero-point correction=                0.208267
(Hartree/Particle)
Thermal correction to Energy=         0.220492
Thermal correction to Enthalpy=       0.221436
Thermal correction to Gibbs Free Energy= 0.167374
Sum of electronic and zero-point Energies= -539.168476
Sum of electronic and thermal Energies= -539.156250
Sum of electronic and thermal Enthalpies= -539.155306
Sum of electronic and thermal Free Energies= -539.209368

```

## VIIIs

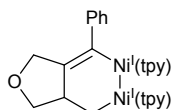

| Center Number | Atomic Number | Atomic Type | Coordinates (Angstroms) |           |           |
|---------------|---------------|-------------|-------------------------|-----------|-----------|
|               |               |             | X                       | Y         | Z         |
| 1             | 1             | 0           | -2.001065               | 5.571224  | 0.883237  |
| 2             | 6             | 0           | -1.815372               | 4.502911  | 0.831552  |
| 3             | 7             | 0           | -1.355838               | 1.746798  | 0.707274  |
| 4             | 6             | 0           | -0.640121               | 3.978385  | 1.319613  |
| 5             | 6             | 0           | -2.770921               | 3.635361  | 0.267854  |
| 6             | 6             | 0           | -2.488034               | 2.285516  | 0.224246  |
| 7             | 6             | 0           | -0.408063               | 2.591908  | 1.253097  |
| 8             | 1             | 0           | 0.119787                | 4.624813  | 1.747490  |
| 9             | 1             | 0           | -3.708977               | 4.003728  | -0.129838 |
| 10            | 1             | 0           | -3.191737               | 1.582656  | -0.207478 |
| 11            | 6             | 0           | 0.759562                | 1.927595  | 1.758809  |
| 12            | 6             | 0           | 2.721136                | 0.241975  | 2.805926  |
| 13            | 6             | 0           | 1.834933                | 2.476757  | 2.473587  |
| 14            | 7             | 0           | 0.718194                | 0.573623  | 1.568646  |
| 15            | 6             | 0           | 1.633249                | -0.250858 | 2.115440  |
| 16            | 6             | 0           | 2.820990                | 1.646387  | 2.972636  |
| 17            | 1             | 0           | 1.895176                | 3.549133  | 2.632181  |
| 18            | 1             | 0           | 3.657955                | 2.065984  | 3.519939  |
| 19            | 1             | 0           | 3.459038                | -0.420633 | 3.244332  |
| 20            | 6             | 0           | 1.276851                | -1.668998 | 1.934530  |

|    |    |   |           |           |           |
|----|----|---|-----------|-----------|-----------|
| 21 | 6  | 0 | 0.336278  | -4.230887 | 1.619053  |
| 22 | 6  | 0 | 2.048824  | -2.739047 | 2.385644  |
| 23 | 7  | 0 | 0.080479  | -1.869913 | 1.317730  |
| 24 | 6  | 0 | -0.375738 | -3.122374 | 1.182517  |
| 25 | 6  | 0 | 1.576796  | -4.033271 | 2.225568  |
| 26 | 1  | 0 | 3.006317  | -2.552586 | 2.858861  |
| 27 | 1  | 0 | -1.349012 | -3.213102 | 0.709964  |
| 28 | 1  | 0 | 2.165023  | -4.877277 | 2.571147  |
| 29 | 1  | 0 | -0.080105 | -5.222531 | 1.486920  |
| 30 | 28 | 0 | -0.831206 | -0.164683 | 0.739762  |
| 31 | 1  | 0 | -0.957733 | -0.526852 | -3.288539 |
| 32 | 6  | 0 | -0.316083 | -1.161923 | -2.662327 |
| 33 | 1  | 0 | 0.325818  | -1.711552 | -3.377759 |
| 34 | 6  | 0 | -1.200186 | -2.196462 | -1.962120 |
| 35 | 6  | 0 | -1.836465 | -3.191730 | -2.948832 |
| 36 | 6  | 0 | -3.593803 | -2.535766 | -1.722737 |
| 37 | 6  | 0 | -2.422595 | -1.729595 | -1.168043 |
| 38 | 1  | 0 | -0.585650 | -2.784134 | -1.265288 |
| 39 | 1  | 0 | -2.099184 | -2.666367 | -3.884024 |
| 40 | 1  | 0 | -1.192916 | -4.041685 | -3.197271 |
| 41 | 1  | 0 | -4.149723 | -1.971678 | -2.492773 |
| 42 | 1  | 0 | -4.305233 | -2.862841 | -0.959283 |
| 43 | 6  | 0 | -2.427579 | -0.946249 | -0.074417 |
| 44 | 1  | 0 | -4.807430 | -0.562195 | 3.897496  |
| 45 | 1  | 0 | 4.886453  | -4.143964 | 0.091611  |
| 46 | 6  | 0 | 4.156934  | -3.426209 | -0.269015 |
| 47 | 7  | 0 | 2.268869  | -1.582707 | -1.182120 |
| 48 | 6  | 0 | 4.343432  | -2.070690 | -0.058565 |
| 49 | 6  | 0 | 3.020327  | -3.850229 | -0.965203 |
| 50 | 6  | 0 | 2.113571  | -2.898977 | -1.398577 |
| 51 | 6  | 0 | 3.388417  | -1.164426 | -0.525772 |
| 52 | 1  | 0 | 5.216740  | -1.704332 | 0.470051  |
| 53 | 1  | 0 | 2.836398  | -4.899041 | -1.166339 |
| 54 | 1  | 0 | 1.228379  | -3.185399 | -1.954271 |
| 55 | 6  | 0 | 3.497644  | 0.293110  | -0.387091 |
| 56 | 6  | 0 | 3.358898  | 3.046900  | -0.352240 |
| 57 | 6  | 0 | 4.567964  | 0.996890  | 0.124484  |
| 58 | 7  | 0 | 2.404178  | 0.925653  | -0.859656 |
| 59 | 6  | 0 | 2.304454  | 2.281437  | -0.862364 |
| 60 | 6  | 0 | 4.476582  | 2.404293  | 0.160502  |
| 61 | 1  | 0 | 5.449959  | 0.491720  | 0.501647  |
| 62 | 1  | 0 | 5.300613  | 2.987071  | 0.558110  |
| 63 | 1  | 0 | 3.300896  | 4.130549  | -0.344723 |
| 64 | 6  | 0 | 1.084865  | 2.746764  | -1.477729 |
| 65 | 6  | 0 | -1.294182 | 3.413237  | -2.702375 |
| 66 | 6  | 0 | 0.741138  | 4.101874  | -1.639557 |
| 67 | 7  | 0 | 0.263666  | 1.747158  | -1.950167 |
| 68 | 6  | 0 | -0.895311 | 2.102554  | -2.527342 |
| 69 | 6  | 0 | -0.442258 | 4.440196  | -2.252903 |
| 70 | 1  | 0 | 1.409807  | 4.869373  | -1.263556 |
| 71 | 1  | 0 | -1.530545 | 1.283157  | -2.845226 |
| 72 | 1  | 0 | -0.718160 | 5.482494  | -2.377708 |
| 73 | 1  | 0 | -2.241355 | 3.628736  | -3.182024 |
| 74 | 28 | 0 | 0.990282  | -0.094102 | -1.660914 |
| 75 | 8  | 0 | -3.007294 | -3.682411 | -2.321528 |
| 76 | 6  | 0 | -4.844594 | -0.523740 | 2.812363  |
| 77 | 6  | 0 | -4.914531 | -0.424483 | 0.038835  |
| 78 | 6  | 0 | -6.048023 | -0.244723 | 2.164931  |
| 79 | 6  | 0 | -3.686234 | -0.742705 | 2.074229  |
| 80 | 6  | 0 | -3.692281 | -0.715977 | 0.668251  |
| 81 | 6  | 0 | -6.074944 | -0.191537 | 0.773455  |



|                                              |   |   |              |           |           |
|----------------------------------------------|---|---|--------------|-----------|-----------|
| 82                                           | 1 | 0 | -6.951345    | -0.061688 | 2.738710  |
| 83                                           | 1 | 0 | -2.747169    | -0.942374 | 2.587699  |
| 84                                           | 1 | 0 | -7.002306    | 0.037174  | 0.255713  |
| 85                                           | 1 | 0 | -4.944485    | -0.355742 | -1.045968 |
| Zero-point correction=                       |   |   | 0.676263     |           |           |
| (Hartree/Particle)                           |   |   |              |           |           |
| Thermal correction to Energy=                |   |   | 0.716654     |           |           |
| Thermal correction to Enthalpy=              |   |   | 0.717598     |           |           |
| Thermal correction to Gibbs Free Energy=     |   |   | 0.606200     |           |           |
| Sum of electronic and zero-point Energies=   |   |   | -2361.828571 |           |           |
| Sum of electronic and thermal Energies=      |   |   | -2361.788180 |           |           |
| Sum of electronic and thermal Enthalpies=    |   |   | -2361.787236 |           |           |
| Sum of electronic and thermal Free Energies= |   |   | -2361.898634 |           |           |

## VIIc

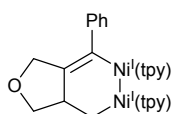

| Center Number | Atomic Number | Atomic Type | Coordinates (Angstroms) |           |           |
|---------------|---------------|-------------|-------------------------|-----------|-----------|
|               |               |             | X                       | Y         | Z         |
| 1             | 1             | 0           | -0.994536               | 5.225410  | 2.003385  |
| 2             | 6             | 0           | -0.946785               | 4.161803  | 1.790124  |
| 3             | 7             | 0           | -0.839631               | 1.424804  | 1.215479  |
| 4             | 6             | 0           | 0.176068                | 3.440863  | 2.110448  |
| 5             | 6             | 0           | -2.036373               | 3.505094  | 1.171200  |
| 6             | 6             | 0           | -1.922411               | 2.158614  | 0.899905  |
| 7             | 6             | 0           | 0.224554                | 2.053051  | 1.838157  |
| 8             | 1             | 0           | 1.031964                | 3.919634  | 2.575024  |
| 9             | 1             | 0           | -2.938328               | 4.038510  | 0.896184  |
| 10            | 1             | 0           | -2.724780               | 1.616156  | 0.410870  |
| 11            | 6             | 0           | 1.316499                | 1.194003  | 2.163563  |
| 12            | 6             | 0           | 3.172746                | -0.827365 | 2.691146  |
| 13            | 6             | 0           | 2.496014                | 1.499927  | 2.874543  |
| 14            | 7             | 0           | 1.124364                | -0.091622 | 1.736699  |
| 15            | 6             | 0           | 2.001080                | -1.074380 | 2.009300  |
| 16            | 6             | 0           | 3.413837                | 0.503106  | 3.126536  |
| 17            | 1             | 0           | 2.676227                | 2.511411  | 3.224206  |
| 18            | 1             | 0           | 4.322200                | 0.730406  | 3.674402  |
| 19            | 1             | 0           | 3.882195                | -1.617704 | 2.905874  |
| 20            | 6             | 0           | 1.514531                | -2.388383 | 1.539687  |
| 21            | 6             | 0           | 0.360620                | -4.743277 | 0.726459  |
| 22            | 6             | 0           | 2.236007                | -3.574166 | 1.654860  |
| 23            | 7             | 0           | 0.261724                | -2.371637 | 1.016713  |
| 24            | 6             | 0           | -0.298902               | -3.524271 | 0.633145  |
| 25            | 6             | 0           | 1.654325                | -4.764350 | 1.240638  |
| 26            | 1             | 0           | 3.242119                | -3.557096 | 2.057714  |
| 27            | 1             | 0           | -1.308038               | -3.443965 | 0.239675  |
| 28            | 1             | 0           | 2.202198                | -5.697740 | 1.320338  |
| 29            | 1             | 0           | -0.136884               | -5.649678 | 0.402186  |
| 30            | 28            | 0           | -0.533258               | -0.511019 | 0.878914  |
| 31            | 1             | 0           | -1.352423               | -0.196914 | -3.422634 |
| 32            | 6             | 0           | -0.613453               | -0.807297 | -2.881682 |
| 33            | 1             | 0           | 0.010965                | -1.267155 | -3.669037 |
| 34            | 6             | 0           | -1.353494               | -1.930660 | -2.154404 |
| 35            | 6             | 0           | -2.129590               | -2.851374 | -3.119451 |

|    |    |   |           |           |           |
|----|----|---|-----------|-----------|-----------|
| 36 | 6  | 0 | -3.718740 | -2.176031 | -1.685712 |
| 37 | 6  | 0 | -2.440593 | -1.542517 | -1.150900 |
| 38 | 1  | 0 | -0.617387 | -2.542785 | -1.619005 |
| 39 | 1  | 0 | -2.441866 | -2.275042 | -4.007513 |
| 40 | 1  | 0 | -1.557853 | -3.722399 | -3.453616 |
| 41 | 1  | 0 | -4.264879 | -1.496072 | -2.365243 |
| 42 | 1  | 0 | -4.408166 | -2.510892 | -0.906666 |
| 43 | 6  | 0 | -2.260696 | -0.975152 | 0.056009  |
| 44 | 1  | 0 | -4.295064 | -1.122686 | 4.235413  |
| 45 | 1  | 0 | 5.053562  | -3.327547 | -0.659805 |
| 46 | 6  | 0 | 4.221390  | -2.679262 | -0.917089 |
| 47 | 7  | 0 | 2.046343  | -1.029472 | -1.562469 |
| 48 | 6  | 0 | 4.248342  | -1.350587 | -0.579168 |
| 49 | 6  | 0 | 3.097590  | -3.192490 | -1.609776 |
| 50 | 6  | 0 | 2.059958  | -2.332693 | -1.897190 |
| 51 | 6  | 0 | 3.161080  | -0.507775 | -0.918849 |
| 52 | 1  | 0 | 5.097261  | -0.927997 | -0.051017 |
| 53 | 1  | 0 | 3.037931  | -4.232770 | -1.906153 |
| 54 | 1  | 0 | 1.185969  | -2.686012 | -2.434355 |
| 55 | 6  | 0 | 3.104677  | 0.891019  | -0.654095 |
| 56 | 6  | 0 | 2.622595  | 3.637226  | -0.402441 |
| 57 | 6  | 0 | 4.097459  | 1.727281  | -0.090774 |
| 58 | 7  | 0 | 1.924983  | 1.459822  | -1.044020 |
| 59 | 6  | 0 | 1.688646  | 2.774696  | -0.938647 |
| 60 | 6  | 0 | 3.854325  | 3.076720  | 0.031636  |
| 61 | 1  | 0 | 5.041566  | 1.309067  | 0.243304  |
| 62 | 1  | 0 | 4.612018  | 3.724433  | 0.460637  |
| 63 | 1  | 0 | 2.435326  | 4.700455  | -0.313415 |
| 64 | 6  | 0 | 0.347943  | 3.132955  | -1.456709 |
| 65 | 6  | 0 | -2.182956 | 3.581871  | -2.417553 |
| 66 | 6  | 0 | -0.151093 | 4.432596  | -1.479032 |
| 67 | 7  | 0 | -0.378768 | 2.086714  | -1.927859 |
| 68 | 6  | 0 | -1.619245 | 2.312581  | -2.369942 |
| 69 | 6  | 0 | -1.426250 | 4.662858  | -1.977728 |
| 70 | 1  | 0 | 0.453625  | 5.249692  | -1.102817 |
| 71 | 1  | 0 | -2.174726 | 1.437577  | -2.688310 |
| 72 | 1  | 0 | -1.829192 | 5.670056  | -2.006807 |
| 73 | 1  | 0 | -3.190809 | 3.709383  | -2.794669 |
| 74 | 28 | 0 | 0.616027  | 0.317541  | -1.866728 |
| 75 | 8  | 0 | -3.272695 | -3.309577 | -2.417547 |
| 76 | 6  | 0 | -4.400258 | -0.871173 | 3.183774  |
| 77 | 6  | 0 | -4.647167 | -0.231435 | 0.494040  |
| 78 | 6  | 0 | -5.603011 | -0.348181 | 2.708833  |
| 79 | 6  | 0 | -3.329116 | -1.064371 | 2.317557  |
| 80 | 6  | 0 | -3.428605 | -0.765289 | 0.947397  |
| 81 | 6  | 0 | -5.719210 | -0.025469 | 1.358988  |
| 82 | 1  | 0 | -6.436277 | -0.187697 | 3.386018  |
| 83 | 1  | 0 | -2.390022 | -1.461793 | 2.699508  |
| 84 | 1  | 0 | -6.646908 | 0.391743  | 0.977318  |
| 85 | 1  | 0 | -4.740102 | 0.043847  | -0.554479 |

```

-----
Zero-point correction=                0.675799
(Hartree/Particle)
Thermal correction to Energy=         0.716411
Thermal correction to Enthalpy=       0.717355
Thermal correction to Gibbs Free Energy= 0.604388
Sum of electronic and zero-point Energies= -2361.832154
Sum of electronic and thermal Energies= -2361.791542
Sum of electronic and thermal Enthalpies= -2361.790597
Sum of electronic and thermal Free Energies= -2361.903565

```

VIII

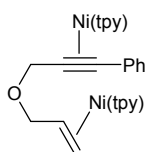

| Center Number | Atomic Number | Atomic Type | Coordinates (Angstroms) |           |           |
|---------------|---------------|-------------|-------------------------|-----------|-----------|
|               |               |             | X                       | Y         | Z         |
| 1             | 8             | 0           | 0.678714                | -3.500491 | -0.396175 |
| 2             | 6             | 0           | 0.878335                | -2.276960 | -1.099637 |
| 3             | 1             | 0           | 1.259037                | -2.522726 | -2.105063 |
| 4             | 1             | 0           | 1.655593                | -1.687790 | -0.597654 |
| 5             | 6             | 0           | -0.336300               | -1.439791 | -1.239699 |
| 6             | 6             | 0           | -1.635145               | -1.372505 | -1.198361 |
| 7             | 6             | 0           | 1.521131                | -3.638361 | 0.742159  |
| 8             | 1             | 0           | 2.555494                | -3.384180 | 0.459869  |
| 9             | 1             | 0           | 1.511108                | -4.718368 | 0.953469  |
| 10            | 6             | 0           | 1.086669                | -2.846866 | 1.959353  |
| 11            | 1             | 0           | 1.890220                | -2.777410 | 2.702712  |
| 12            | 6             | 0           | -0.268461               | -3.005186 | 2.424057  |
| 13            | 1             | 0           | -0.477110               | -3.028595 | 3.497374  |
| 14            | 1             | 0           | -0.953923               | -3.617257 | 1.831566  |
| 15            | 28            | 0           | -0.843514               | 0.335599  | -1.521244 |
| 16            | 1             | 0           | 4.786419                | -2.040321 | -3.171427 |
| 17            | 6             | 0           | 3.857469                | -1.495871 | -3.311711 |
| 18            | 7             | 0           | 1.470538                | -0.087804 | -3.659661 |
| 19            | 6             | 0           | 3.543179                | -0.417250 | -2.493556 |
| 20            | 6             | 0           | 2.957929                | -1.863556 | -4.305751 |
| 21            | 6             | 0           | 1.782593                | -1.124373 | -4.436168 |
| 22            | 6             | 0           | 2.334255                | 0.251470  | -2.696658 |
| 23            | 1             | 0           | 4.205679                | -0.106366 | -1.694594 |
| 24            | 1             | 0           | 3.155396                | -2.698984 | -4.968215 |
| 25            | 1             | 0           | 1.057603                | -1.375824 | -5.206384 |
| 26            | 6             | 0           | 1.991571                | 1.456490  | -1.890122 |
| 27            | 6             | 0           | 1.287320                | 3.827701  | -0.704787 |
| 28            | 6             | 0           | 2.992788                | 2.355827  | -1.511378 |
| 29            | 7             | 0           | 0.701045                | 1.698333  | -1.632572 |
| 30            | 6             | 0           | 0.345242                | 2.879817  | -1.098159 |
| 31            | 6             | 0           | 2.634311                | 3.542445  | -0.890085 |
| 32            | 1             | 0           | 4.030522                | 2.138093  | -1.735516 |
| 33            | 1             | 0           | 3.392629                | 4.255448  | -0.582793 |
| 34            | 1             | 0           | 0.984017                | 4.766253  | -0.256908 |
| 35            | 6             | 0           | -1.122667               | 3.116956  | -1.023026 |
| 36            | 6             | 0           | -3.844858               | 3.436164  | -1.134525 |
| 37            | 6             | 0           | -1.678368               | 4.344083  | -0.659230 |
| 38            | 7             | 0           | -1.890989               | 2.078365  | -1.404600 |
| 39            | 6             | 0           | -3.214413               | 2.239494  | -1.460675 |
| 40            | 6             | 0           | -3.058862               | 4.503958  | -0.717044 |
| 41            | 1             | 0           | -1.048557               | 5.172626  | -0.357915 |
| 42            | 1             | 0           | -3.780997               | 1.371917  | -1.778531 |
| 43            | 1             | 0           | -3.509780               | 5.454230  | -0.449694 |
| 44            | 1             | 0           | -4.923245               | 3.519046  | -1.206973 |
| 45            | 28            | 0           | -0.002260               | -1.212459 | 1.807338  |
| 46            | 1             | 0           | 5.490805                | -1.283987 | 3.799802  |
| 47            | 6             | 0           | 4.868052                | -1.055354 | 2.940834  |
| 48            | 7             | 0           | 3.247204                | -0.467047 | 0.738699  |
| 49            | 6             | 0           | 3.879339                | -0.080951 | 3.023982  |
| 50            | 6             | 0           | 5.032527                | -1.733932 | 1.739542  |

|    |   |   |           |           |           |
|----|---|---|-----------|-----------|-----------|
| 51 | 6 | 0 | 4.200970  | -1.395907 | 0.674006  |
| 52 | 6 | 0 | 3.084687  | 0.166094  | 1.901943  |
| 53 | 1 | 0 | 3.701487  | 0.463342  | 3.945789  |
| 54 | 1 | 0 | 5.784104  | -2.506498 | 1.622309  |
| 55 | 1 | 0 | 4.303934  | -1.902970 | -0.284180 |
| 56 | 6 | 0 | 2.005023  | 1.191182  | 2.002542  |
| 57 | 6 | 0 | 0.010286  | 3.015012  | 2.391873  |
| 58 | 6 | 0 | 2.337938  | 2.489186  | 2.396478  |
| 59 | 7 | 0 | 0.739326  | 0.801273  | 1.793270  |
| 60 | 6 | 0 | -0.245606 | 1.698269  | 2.003870  |
| 61 | 6 | 0 | 1.323658  | 3.417553  | 2.586158  |
| 62 | 1 | 0 | 3.379566  | 2.749096  | 2.552351  |
| 63 | 1 | 0 | 1.550465  | 4.432749  | 2.896241  |
| 64 | 1 | 0 | -0.807754 | 3.700717  | 2.579498  |
| 65 | 6 | 0 | -1.633923 | 1.177934  | 1.905533  |
| 66 | 6 | 0 | -4.116133 | 0.029786  | 1.796691  |
| 67 | 6 | 0 | -2.753914 | 2.001461  | 1.827114  |
| 68 | 7 | 0 | -1.737678 | -0.160531 | 1.939433  |
| 69 | 6 | 0 | -2.945494 | -0.721230 | 1.884429  |
| 70 | 6 | 0 | -4.014207 | 1.414064  | 1.768677  |
| 71 | 1 | 0 | -2.651044 | 3.079590  | 1.780440  |
| 72 | 1 | 0 | -2.965342 | -1.806929 | 1.901137  |
| 73 | 1 | 0 | -4.901264 | 2.035799  | 1.695181  |
| 74 | 1 | 0 | -5.074332 | -0.473855 | 1.739517  |
| 75 | 1 | 0 | -5.842990 | -4.473448 | 0.014407  |
| 76 | 6 | 0 | -4.993611 | -3.849859 | -0.248456 |
| 77 | 6 | 0 | -2.783919 | -2.223481 | -0.916320 |
| 78 | 6 | 0 | -3.691753 | -4.339697 | -0.123624 |
| 79 | 6 | 0 | -5.191488 | -2.553257 | -0.720070 |
| 80 | 6 | 0 | -4.099028 | -1.754410 | -1.048114 |
| 81 | 6 | 0 | -2.602093 | -3.542497 | -0.457680 |
| 82 | 1 | 0 | -3.526604 | -5.350615 | 0.239825  |
| 83 | 1 | 0 | -6.199738 | -2.162095 | -0.829653 |
| 84 | 1 | 0 | -4.252874 | -0.737947 | -1.399619 |
| 85 | 1 | 0 | -1.582865 | -3.906782 | -0.356015 |

```

-----
Zero-point correction=                0.674107
(Hartree/Particle)
Thermal correction to Energy=         0.716697
Thermal correction to Enthalpy=       0.717641
Thermal correction to Gibbs Free Energy= 0.598489
Sum of electronic and zero-point Energies= -2361.746327
Sum of electronic and thermal Energies= -2361.703738
Sum of electronic and thermal Enthalpies= -2361.702793
Sum of electronic and thermal Free Energies= -2361.821946

```

### VIII t

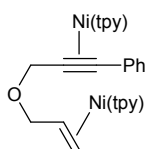

| Center Number | Atomic Number | Atomic Type | Coordinates (Angstroms) |           |           |
|---------------|---------------|-------------|-------------------------|-----------|-----------|
|               |               |             | X                       | Y         | Z         |
| 1             | 8             | 0           | 0.755588                | -3.903127 | -0.498296 |
| 2             | 6             | 0           | 0.172784                | -3.003680 | 0.460233  |
| 3             | 1             | 0           | 0.013563                | -3.575561 | 1.385107  |

|    |    |   |           |           |           |
|----|----|---|-----------|-----------|-----------|
| 4  | 1  | 0 | -0.824771 | -2.701313 | 0.105435  |
| 5  | 6  | 0 | 1.003419  | -1.811604 | 0.747094  |
| 6  | 6  | 0 | 2.233646  | -1.376114 | 0.684558  |
| 7  | 6  | 0 | -0.011174 | -4.058695 | -1.658177 |
| 8  | 1  | 0 | -1.044650 | -4.339768 | -1.404995 |
| 9  | 1  | 0 | 0.413591  | -4.911561 | -2.203102 |
| 10 | 6  | 0 | 0.014867  | -2.860819 | -2.585403 |
| 11 | 1  | 0 | -0.759398 | -2.821379 | -3.352790 |
| 12 | 6  | 0 | 1.022659  | -1.975862 | -2.596981 |
| 13 | 1  | 0 | 1.105679  | -1.217097 | -3.370987 |
| 14 | 1  | 0 | 1.819935  | -2.058371 | -1.862247 |
| 15 | 28 | 0 | 1.053176  | -0.007724 | 1.296148  |
| 16 | 1  | 0 | -3.912118 | -3.777954 | 1.738297  |
| 17 | 6  | 0 | -3.145506 | -3.134340 | 2.159823  |
| 18 | 7  | 0 | -1.169654 | -1.468364 | 3.224483  |
| 19 | 6  | 0 | -3.030410 | -1.812450 | 1.743254  |
| 20 | 6  | 0 | -2.262749 | -3.609016 | 3.122763  |
| 21 | 6  | 0 | -1.297167 | -2.733370 | 3.620820  |
| 22 | 6  | 0 | -2.022729 | -1.019346 | 2.295689  |
| 23 | 1  | 0 | -3.702974 | -1.397897 | 0.999357  |
| 24 | 1  | 0 | -2.314297 | -4.629570 | 3.485860  |
| 25 | 1  | 0 | -0.592294 | -3.067990 | 4.378264  |
| 26 | 6  | 0 | -1.925465 | 0.426208  | 1.944728  |
| 27 | 6  | 0 | -1.721798 | 3.136277  | 1.615151  |
| 28 | 6  | 0 | -3.088802 | 1.196728  | 1.914746  |
| 29 | 7  | 0 | -0.710579 | 0.963430  | 1.767795  |
| 30 | 6  | 0 | -0.599036 | 2.298921  | 1.632027  |
| 31 | 6  | 0 | -2.978011 | 2.572637  | 1.735963  |
| 32 | 1  | 0 | -4.052826 | 0.726571  | 2.074557  |
| 33 | 1  | 0 | -3.864323 | 3.198096  | 1.705158  |
| 34 | 1  | 0 | -1.615545 | 4.205427  | 1.481264  |
| 35 | 6  | 0 | 0.784649  | 2.817973  | 1.563031  |
| 36 | 6  | 0 | 3.420370  | 3.596511  | 1.600592  |
| 37 | 6  | 0 | 1.094658  | 4.180269  | 1.577262  |
| 38 | 7  | 0 | 1.753253  | 1.878459  | 1.544524  |
| 39 | 6  | 0 | 3.031185  | 2.262946  | 1.568094  |
| 40 | 6  | 0 | 2.426906  | 4.570631  | 1.589386  |
| 41 | 1  | 0 | 0.309894  | 4.927159  | 1.591854  |
| 42 | 1  | 0 | 3.760084  | 1.460553  | 1.576710  |
| 43 | 1  | 0 | 2.684501  | 5.624915  | 1.605255  |
| 44 | 1  | 0 | 4.472357  | 3.855837  | 1.624332  |
| 45 | 28 | 0 | -0.511400 | -0.437794 | -1.604538 |
| 46 | 1  | 0 | -6.474111 | -1.561848 | -1.040652 |
| 47 | 6  | 0 | -5.408855 | -1.416207 | -1.188106 |
| 48 | 7  | 0 | -2.664885 | -1.024012 | -1.535859 |
| 49 | 6  | 0 | -4.865841 | -0.140092 | -1.170898 |
| 50 | 6  | 0 | -4.560089 | -2.502218 | -1.397956 |
| 51 | 6  | 0 | -3.204859 | -2.248076 | -1.557151 |
| 52 | 6  | 0 | -3.490549 | 0.032612  | -1.369865 |
| 53 | 1  | 0 | -5.502357 | 0.720234  | -1.001180 |
| 54 | 1  | 0 | -4.931287 | -3.520107 | -1.429927 |
| 55 | 1  | 0 | -2.510484 | -3.066705 | -1.706240 |
| 56 | 6  | 0 | -2.858091 | 1.374413  | -1.422266 |
| 57 | 6  | 0 | -1.484394 | 3.743666  | -1.565462 |
| 58 | 6  | 0 | -3.583600 | 2.551347  | -1.469485 |
| 59 | 7  | 0 | -1.517010 | 1.344886  | -1.450368 |
| 60 | 6  | 0 | -0.802633 | 2.510731  | -1.541756 |
| 61 | 6  | 0 | -2.863663 | 3.767115  | -1.520835 |
| 62 | 1  | 0 | -4.666582 | 2.556534  | -1.476395 |
| 63 | 1  | 0 | -3.395723 | 4.712342  | -1.555309 |
| 64 | 1  | 0 | -0.933804 | 4.676398  | -1.632418 |

|    |   |   |          |           |           |
|----|---|---|----------|-----------|-----------|
| 65 | 6 | 0 | 0.627503 | 2.353113  | -1.649719 |
| 66 | 6 | 0 | 3.353746 | 1.900582  | -1.833061 |
| 67 | 6 | 0 | 1.527296 | 3.448050  | -1.680197 |
| 68 | 7 | 0 | 1.095549 | 1.069178  | -1.717490 |
| 69 | 6 | 0 | 2.417199 | 0.880420  | -1.796771 |
| 70 | 6 | 0 | 2.880280 | 3.223540  | -1.773014 |
| 71 | 1 | 0 | 1.150062 | 4.462569  | -1.615260 |
| 72 | 1 | 0 | 2.746486 | -0.153679 | -1.823182 |
| 73 | 1 | 0 | 3.571989 | 4.061003  | -1.786939 |
| 74 | 1 | 0 | 4.410723 | 1.669522  | -1.903173 |
| 75 | 1 | 0 | 7.112559 | -3.066937 | -0.809503 |
| 76 | 6 | 0 | 6.126722 | -2.725878 | -0.508085 |
| 77 | 6 | 0 | 3.558876 | -1.842100 | 0.279923  |
| 78 | 6 | 0 | 5.096149 | -3.642899 | -0.299013 |
| 79 | 6 | 0 | 5.874782 | -1.367138 | -0.329367 |
| 80 | 6 | 0 | 4.610529 | -0.936623 | 0.062650  |
| 81 | 6 | 0 | 3.831352 | -3.209902 | 0.085334  |
| 82 | 1 | 0 | 5.280250 | -4.704566 | -0.440347 |
| 83 | 1 | 0 | 6.665508 | -0.640005 | -0.493716 |
| 84 | 1 | 0 | 4.408679 | 0.123294  | 0.181734  |
| 85 | 1 | 0 | 3.025609 | -3.923207 | 0.227564  |

---

|                                              |              |
|----------------------------------------------|--------------|
| Zero-point correction=                       | 0.671189     |
| (Hartree/Particle)                           |              |
| Thermal correction to Energy=                | 0.714657     |
| Thermal correction to Enthalpy=              | 0.715601     |
| Thermal correction to Gibbs Free Energy=     | 0.594832     |
| Sum of electronic and zero-point Energies=   | -2361.800377 |
| Sum of electronic and thermal Energies=      | -2361.756910 |
| Sum of electronic and thermal Enthalpies=    | -2361.755966 |
| Sum of electronic and thermal Free Energies= | -2361.876735 |

## IXs

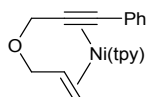


---

| Center Number | Atomic Number | Atomic Type | Coordinates (Angstroms) |           |           |
|---------------|---------------|-------------|-------------------------|-----------|-----------|
|               |               |             | X                       | Y         | Z         |
| 1             | 28            | 0           | 0.637111                | 0.757347  | -0.330960 |
| 2             | 6             | 0           | 0.528850                | 3.583136  | 1.096053  |
| 3             | 1             | 0           | -0.278600               | 4.278883  | 1.344981  |
| 4             | 1             | 0           | 1.190060                | 3.505114  | 1.976147  |
| 5             | 6             | 0           | 0.004206                | 2.233271  | 0.784110  |
| 6             | 6             | 0           | -0.722663               | 1.220766  | 1.013800  |
| 7             | 6             | 0           | 2.232728                | 3.352481  | -0.528436 |
| 8             | 1             | 0           | 2.874590                | 2.917313  | 0.256066  |
| 9             | 1             | 0           | 2.848667                | 4.026636  | -1.135622 |
| 10            | 6             | 0           | 1.663075                | 2.262217  | -1.393700 |
| 11            | 1             | 0           | 0.917076                | 2.605664  | -2.110836 |
| 12            | 6             | 0           | 2.271550                | 1.040675  | -1.595088 |
| 13            | 1             | 0           | 2.052836                | 0.447159  | -2.477796 |
| 14            | 1             | 0           | 3.177248                | 0.782785  | -1.046404 |
| 15            | 1             | 0           | 5.960251                | -1.692331 | -0.116758 |
| 16            | 6             | 0           | 4.986605                | -1.412068 | 0.272494  |
| 17            | 7             | 0           | 2.477881                | -0.688890 | 1.261015  |
| 18            | 6             | 0           | 3.830779                | -2.006047 | -0.225173 |
| 19            | 6             | 0           | 4.868018                | -0.447181 | 1.266727  |

|    |   |   |           |           |           |
|----|---|---|-----------|-----------|-----------|
| 20 | 6 | 0 | 3.591951  | -0.130324 | 1.731875  |
| 21 | 6 | 0 | 2.599088  | -1.597872 | 0.288094  |
| 22 | 1 | 0 | 3.875108  | -2.747094 | -1.016903 |
| 23 | 1 | 0 | 5.739643  | 0.047219  | 1.680991  |
| 24 | 1 | 0 | 3.457366  | 0.607977  | 2.518713  |
| 25 | 6 | 0 | 1.330050  | -2.158762 | -0.255366 |
| 26 | 6 | 0 | -1.038940 | -3.131466 | -1.193592 |
| 27 | 6 | 0 | 1.163847  | -3.538486 | -0.368787 |
| 28 | 7 | 0 | 0.373528  | -1.282687 | -0.604961 |
| 29 | 6 | 0 | -0.792816 | -1.762631 | -1.069835 |
| 30 | 6 | 0 | -0.044823 | -4.033391 | -0.841610 |
| 31 | 1 | 0 | 1.966477  | -4.201518 | -0.064476 |
| 32 | 1 | 0 | -0.208158 | -5.102107 | -0.934041 |
| 33 | 1 | 0 | -1.992336 | -3.470709 | -1.583359 |
| 34 | 6 | 0 | -1.840624 | -0.777974 | -1.459019 |
| 35 | 6 | 0 | -3.701542 | 1.088823  | -2.146953 |
| 36 | 6 | 0 | -3.165538 | -0.976984 | -1.067618 |
| 37 | 7 | 0 | -1.438691 | 0.281295  | -2.170628 |
| 38 | 6 | 0 | -2.356606 | 1.189299  | -2.499080 |
| 39 | 6 | 0 | -4.111388 | -0.020736 | -1.416644 |
| 40 | 1 | 0 | -3.432265 | -1.830041 | -0.451720 |
| 41 | 1 | 0 | -1.999943 | 2.041647  | -3.072695 |
| 42 | 1 | 0 | -5.144435 | -0.131546 | -1.102373 |
| 43 | 1 | 0 | -4.400566 | 1.865402  | -2.437451 |
| 44 | 1 | 0 | -5.167800 | 0.827623  | 2.223314  |
| 45 | 6 | 0 | -4.187697 | 0.361510  | 2.171958  |
| 46 | 6 | 0 | -3.103268 | 1.088874  | 1.693547  |
| 47 | 1 | 0 | -3.233653 | 2.112967  | 1.355817  |
| 48 | 6 | 0 | -1.829935 | 0.504243  | 1.606610  |
| 49 | 6 | 0 | -1.674006 | -0.825574 | 2.030817  |
| 50 | 1 | 0 | -0.689207 | -1.281126 | 1.960672  |
| 51 | 6 | 0 | -2.757336 | -1.545543 | 2.523420  |
| 52 | 1 | 0 | -2.616731 | -2.571353 | 2.852458  |
| 53 | 6 | 0 | -4.022007 | -0.959819 | 2.586179  |
| 54 | 1 | 0 | -4.869801 | -1.526063 | 2.959889  |
| 55 | 8 | 0 | 1.239587  | 4.188894  | 0.032697  |

```

-----
Zero-point correction=                0.440534
(Hartree/Particle)
Thermal correction to Energy=         0.467944
Thermal correction to Enthalpy=       0.468889
Thermal correction to Gibbs Free Energy= 0.381288
Sum of electronic and zero-point Energies= -1450.464548
Sum of electronic and thermal Energies= -1450.437138
Sum of electronic and thermal Enthalpies= -1450.436194
Sum of electronic and thermal Free Energies= -1450.523794

```

### IXt

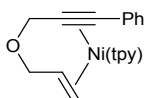

| Center Number | Atomic Number | Atomic Type | Coordinates (Angstroms) |          |           |
|---------------|---------------|-------------|-------------------------|----------|-----------|
|               |               |             | X                       | Y        | Z         |
| 1             | 28            | 0           | 0.543233                | 0.820513 | -0.441600 |
| 2             | 6             | 0           | 1.901108                | 2.906563 | 1.877549  |
| 3             | 1             | 0           | 1.690804                | 3.430644 | 2.814395  |
| 4             | 1             | 0           | 2.918119                | 2.489978 | 1.950206  |

|    |   |   |           |           |           |
|----|---|---|-----------|-----------|-----------|
| 5  | 6 | 0 | 0.945929  | 1.787618  | 1.737365  |
| 6  | 6 | 0 | 0.194274  | 0.836319  | 1.877576  |
| 7  | 6 | 0 | 2.360691  | 3.481601  | -0.386418 |
| 8  | 1 | 0 | 3.236332  | 2.825057  | -0.261805 |
| 9  | 1 | 0 | 2.704986  | 4.406747  | -0.862700 |
| 10 | 6 | 0 | 1.325530  | 2.836330  | -1.264621 |
| 11 | 1 | 0 | 0.373585  | 3.362225  | -1.312558 |
| 12 | 6 | 0 | 1.573023  | 1.838662  | -2.147581 |
| 13 | 1 | 0 | 0.849076  | 1.569701  | -2.910561 |
| 14 | 1 | 0 | 2.550988  | 1.364382  | -2.205064 |
| 15 | 1 | 0 | 4.741590  | -3.587162 | -0.274063 |
| 16 | 6 | 0 | 4.022299  | -2.774437 | -0.263948 |
| 17 | 7 | 0 | 2.172847  | -0.704578 | -0.261411 |
| 18 | 6 | 0 | 2.716611  | -2.992909 | -0.681708 |
| 19 | 6 | 0 | 4.393048  | -1.503375 | 0.167208  |
| 20 | 6 | 0 | 3.428145  | -0.504543 | 0.144822  |
| 21 | 6 | 0 | 1.802206  | -1.935697 | -0.663871 |
| 22 | 1 | 0 | 2.411020  | -3.974621 | -1.022482 |
| 23 | 1 | 0 | 5.399222  | -1.288207 | 0.507890  |
| 24 | 1 | 0 | 3.665581  | 0.506809  | 0.468044  |
| 25 | 6 | 0 | 0.369227  | -2.096313 | -1.050090 |
| 26 | 6 | 0 | -2.323198 | -2.172006 | -1.579909 |
| 27 | 6 | 0 | -0.204068 | -3.320569 | -1.353455 |
| 28 | 7 | 0 | -0.325889 | -0.956706 | -1.027401 |
| 29 | 6 | 0 | -1.679702 | -0.946700 | -1.245189 |
| 30 | 6 | 0 | -1.593334 | -3.332109 | -1.641603 |
| 31 | 1 | 0 | 0.365549  | -4.240924 | -1.359315 |
| 32 | 1 | 0 | -2.082779 | -4.268020 | -1.893195 |
| 33 | 1 | 0 | -3.389278 | -2.195132 | -1.779261 |
| 34 | 6 | 0 | -2.332591 | 0.309614  | -1.053711 |
| 35 | 6 | 0 | -3.481196 | 2.765073  | -0.400338 |
| 36 | 6 | 0 | -3.743798 | 0.486573  | -1.137736 |
| 37 | 7 | 0 | -1.532339 | 1.379265  | -0.696920 |
| 38 | 6 | 0 | -2.117292 | 2.537574  | -0.373874 |
| 39 | 6 | 0 | -4.309852 | 1.692561  | -0.813806 |
| 40 | 1 | 0 | -4.373926 | -0.343880 | -1.438094 |
| 41 | 1 | 0 | -1.436161 | 3.328384  | -0.057926 |
| 42 | 1 | 0 | -5.387164 | 1.820612  | -0.867596 |
| 43 | 1 | 0 | -3.887990 | 3.729417  | -0.120914 |
| 44 | 1 | 0 | -3.942172 | -1.178821 | 2.126119  |
| 45 | 6 | 0 | -2.863274 | -1.288665 | 2.178171  |
| 46 | 6 | 0 | -2.055123 | -0.165901 | 2.036015  |
| 47 | 1 | 0 | -2.493291 | 0.813366  | 1.866009  |
| 48 | 6 | 0 | -0.661656 | -0.302161 | 2.079440  |
| 49 | 6 | 0 | -0.091158 | -1.568544 | 2.277557  |
| 50 | 1 | 0 | 0.990600  | -1.665187 | 2.301995  |
| 51 | 6 | 0 | -0.906886 | -2.683361 | 2.418347  |
| 52 | 1 | 0 | -0.460370 | -3.662397 | 2.561234  |
| 53 | 6 | 0 | -2.294706 | -2.546635 | 2.363334  |
| 54 | 1 | 0 | -2.930330 | -3.421216 | 2.461887  |
| 55 | 8 | 0 | 1.853450  | 3.888828  | 0.871943  |

```

-----
Zero-point correction=                0.438406
(Hartree/Particle)
Thermal correction to Energy=          0.466389
Thermal correction to Enthalpy=        0.467333
Thermal correction to Gibbs Free Energy= 0.378933
Sum of electronic and zero-point Energies= -1450.497435
Sum of electronic and thermal Energies= -1450.469453
Sum of electronic and thermal Enthalpies= -1450.468509
Sum of electronic and thermal Free Energies= -1450.556908

```



Xs

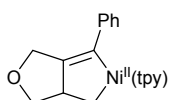

| Center Number | Atomic Number | Atomic Type | Coordinates (Angstroms) |           |           |
|---------------|---------------|-------------|-------------------------|-----------|-----------|
|               |               |             | X                       | Y         | Z         |
| 1             | 1             | 0           | -2.738942               | 5.164181  | 0.538967  |
| 2             | 6             | 0           | -2.220968               | 4.210846  | 0.550160  |
| 3             | 7             | 0           | -0.900498               | 1.772025  | 0.540799  |
| 4             | 6             | 0           | -0.947948               | 4.102020  | -0.001845 |
| 5             | 6             | 0           | -2.802904               | 3.093452  | 1.132832  |
| 6             | 6             | 0           | -2.107275               | 1.887924  | 1.096236  |
| 7             | 6             | 0           | -0.306564               | 2.866801  | 0.029740  |
| 8             | 1             | 0           | -0.465011               | 4.971981  | -0.429413 |
| 9             | 1             | 0           | -3.780950               | 3.137813  | 1.597153  |
| 10            | 1             | 0           | -2.530217               | 0.981507  | 1.512420  |
| 11            | 6             | 0           | 1.112150                | 2.674702  | -0.374375 |
| 12            | 6             | 0           | 3.790465                | 2.253155  | -0.689202 |
| 13            | 6             | 0           | 1.897646                | 3.702047  | -0.892274 |
| 14            | 7             | 0           | 1.616010                | 1.456244  | -0.102205 |
| 15            | 6             | 0           | 2.938087                | 1.261638  | -0.196036 |
| 16            | 6             | 0           | 3.255348                | 3.472949  | -1.075788 |
| 17            | 1             | 0           | 1.468073                | 4.666356  | -1.132994 |
| 18            | 1             | 0           | 3.894537                | 4.253850  | -1.473829 |
| 19            | 1             | 0           | 4.858274                | 2.072987  | -0.735434 |
| 20            | 6             | 0           | 3.493535                | -0.018872 | 0.318719  |
| 21            | 6             | 0           | 4.426732                | -2.381406 | 1.302420  |
| 22            | 6             | 0           | 4.581760                | -0.624217 | -0.311761 |
| 23            | 7             | 0           | 2.899151                | -0.527606 | 1.403757  |
| 24            | 6             | 0           | 3.362480                | -1.684168 | 1.874432  |
| 25            | 6             | 0           | 5.051650                | -1.832907 | 0.189376  |
| 26            | 1             | 0           | 5.021207                | -0.182430 | -1.199705 |
| 27            | 1             | 0           | 2.859229                | -2.075833 | 2.755097  |
| 28            | 1             | 0           | 5.882114                | -2.340856 | -0.289970 |
| 29            | 1             | 0           | 4.752275                | -3.325048 | 1.725667  |
| 30            | 28            | 0           | 0.078925                | 0.052198  | -0.054479 |
| 31            | 1             | 0           | 0.620045                | -1.403888 | -2.002745 |
| 32            | 6             | 0           | 0.972439                | -1.453034 | -0.960069 |
| 33            | 1             | 0           | 2.067106                | -1.442622 | -0.981446 |
| 34            | 6             | 0           | 0.413494                | -2.727288 | -0.330825 |
| 35            | 6             | 0           | 0.322267                | -4.010460 | -1.163102 |
| 36            | 6             | 0           | -1.779788               | -3.787603 | -0.230189 |
| 37            | 6             | 0           | -1.049149               | -2.468190 | -0.094005 |
| 38            | 1             | 0           | 0.934608                | -2.956688 | 0.612752  |
| 39            | 1             | 0           | 0.134301                | -3.753684 | -2.219481 |
| 40            | 1             | 0           | 1.198542                | -4.663263 | -1.110003 |
| 41            | 1             | 0           | -2.585083               | -3.727064 | -0.979947 |
| 42            | 1             | 0           | -2.222268               | -4.153290 | 0.704052  |
| 43            | 6             | 0           | -1.462477               | -1.191112 | -0.060147 |
| 44            | 8             | 0           | -0.784371               | -4.733651 | -0.626432 |
| 45            | 1             | 0           | -2.727048               | 0.520471  | -1.689150 |
| 46            | 1             | 0           | -6.709417               | 0.039676  | -0.134508 |
| 47            | 6             | 0           | -5.654599               | -0.217266 | -0.118867 |
| 48            | 6             | 0           | -2.906716               | -0.880422 | -0.071701 |
| 49            | 6             | 0           | -5.166915               | -1.134228 | 0.810107  |
| 50            | 6             | 0           | -4.772108               | 0.367973  | -1.027812 |
| 51            | 6             | 0           | -3.419702               | 0.046729  | -0.996062 |

|    |   |   |           |           |           |
|----|---|---|-----------|-----------|-----------|
| 52 | 6 | 0 | -3.812387 | -1.462679 | 0.829985  |
| 53 | 1 | 0 | -5.843836 | -1.594680 | 1.524593  |
| 54 | 1 | 0 | -5.141161 | 1.082840  | -1.758230 |
| 55 | 1 | 0 | -3.435288 | -2.167597 | 1.566882  |

---

|                                              |              |
|----------------------------------------------|--------------|
| Zero-point correction=                       | 0.443910     |
| (Hartree/Particle)                           |              |
| Thermal correction to Energy=                | 0.469942     |
| Thermal correction to Enthalpy=              | 0.470886     |
| Thermal correction to Gibbs Free Energy=     | 0.386366     |
| Sum of electronic and zero-point Energies=   | -1450.493167 |
| Sum of electronic and thermal Energies=      | -1450.467136 |
| Sum of electronic and thermal Enthalpies=    | -1450.466192 |
| Sum of electronic and thermal Free Energies= | -1450.550712 |

### Xt

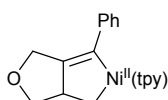


---

| Center Number | Atomic Number | Atomic Type | Coordinates (Angstroms) |           |           |
|---------------|---------------|-------------|-------------------------|-----------|-----------|
|               |               |             | X                       | Y         | Z         |
| 1             | 1             | 0           | -1.013717               | 5.933793  | 0.874607  |
| 2             | 6             | 0           | -0.842414               | 4.880225  | 0.679946  |
| 3             | 7             | 0           | -0.419158               | 2.193872  | 0.185580  |
| 4             | 6             | 0           | -1.920432               | 4.031915  | 0.445647  |
| 5             | 6             | 0           | 0.448604                | 4.364461  | 0.661226  |
| 6             | 6             | 0           | 0.612150                | 3.004929  | 0.409231  |
| 7             | 6             | 0           | -1.669408               | 2.683490  | 0.198264  |
| 8             | 1             | 0           | -2.932042               | 4.419763  | 0.459385  |
| 9             | 1             | 0           | 1.312244                | 4.994688  | 0.838541  |
| 10            | 1             | 0           | 1.592498                | 2.534850  | 0.379683  |
| 11            | 6             | 0           | -2.743374               | 1.681798  | -0.064017 |
| 12            | 6             | 0           | -4.525943               | -0.353428 | -0.563786 |
| 13            | 6             | 0           | -4.106732               | 1.975484  | -0.102189 |
| 14            | 7             | 0           | -2.306345               | 0.436193  | -0.266902 |
| 15            | 6             | 0           | -3.148530               | -0.570834 | -0.512179 |
| 16            | 6             | 0           | -4.998291               | 0.937886  | -0.354836 |
| 17            | 1             | 0           | -4.473817               | 2.982017  | 0.057570  |
| 18            | 1             | 0           | -6.064105               | 1.136802  | -0.390292 |
| 19            | 1             | 0           | -5.218721               | -1.162033 | -0.762891 |
| 20            | 6             | 0           | -2.493614               | -1.895768 | -0.712339 |
| 21            | 6             | 0           | -1.102616               | -4.238043 | -1.034436 |
| 22            | 6             | 0           | -3.201503               | -3.073875 | -0.944467 |
| 23            | 7             | 0           | -1.152672               | -1.884655 | -0.644366 |
| 24            | 6             | 0           | -0.473036               | -3.018858 | -0.798033 |
| 25            | 6             | 0           | -2.491006               | -4.259136 | -1.108265 |
| 26            | 1             | 0           | -4.283917               | -3.076476 | -0.993668 |
| 27            | 1             | 0           | 0.607959                | -2.923602 | -0.716610 |
| 28            | 1             | 0           | -3.019977               | -5.189001 | -1.289443 |
| 29            | 1             | 0           | -0.516164               | -5.141791 | -1.152826 |
| 30            | 28            | 0           | -0.255473               | 0.004374  | 0.057392  |
| 31            | 1             | 0           | 0.068623                | 0.359005  | 2.638581  |
| 32            | 6             | 0           | -0.208550               | -0.539202 | 2.064535  |
| 33            | 1             | 0           | -1.121384               | -0.962925 | 2.505950  |
| 34            | 6             | 0           | 0.944627                | -1.534714 | 2.073981  |
| 35            | 6             | 0           | 1.775329                | -1.731756 | 3.343791  |
| 36            | 6             | 0           | 3.346075                | -1.681044 | 1.668075  |

|    |   |   |          |           |           |
|----|---|---|----------|-----------|-----------|
| 37 | 6 | 0 | 2.045504 | -1.131230 | 1.100407  |
| 38 | 1 | 0 | 0.571069 | -2.533222 | 1.783291  |
| 39 | 1 | 0 | 1.957691 | -0.754830 | 3.824892  |
| 40 | 1 | 0 | 1.336018 | -2.410313 | 4.080936  |
| 41 | 1 | 0 | 4.088244 | -0.887802 | 1.843499  |
| 42 | 1 | 0 | 3.816451 | -2.435086 | 1.024799  |
| 43 | 6 | 0 | 1.792523 | -0.385953 | 0.012799  |
| 44 | 8 | 0 | 3.002639 | -2.307518 | 2.904357  |
| 45 | 1 | 0 | 3.928352 | 1.179959  | 0.633788  |
| 46 | 1 | 0 | 5.668363 | 1.387289  | -3.292887 |
| 47 | 6 | 0 | 4.897229 | 1.020088  | -2.622663 |
| 48 | 6 | 0 | 2.877158 | 0.065287  | -0.876690 |
| 49 | 6 | 0 | 3.877508 | 0.196876  | -3.101181 |
| 50 | 6 | 0 | 4.905258 | 1.371073  | -1.274040 |
| 51 | 6 | 0 | 3.914946 | 0.897765  | -0.417033 |
| 52 | 6 | 0 | 2.880872 | -0.260588 | -2.245331 |
| 53 | 1 | 0 | 3.855233 | -0.082754 | -4.151360 |
| 54 | 1 | 0 | 5.688745 | 2.016863  | -0.885896 |
| 55 | 1 | 0 | 2.077696 | -0.886482 | -2.630159 |

```

-----
Zero-point correction=                0.441620
(Hartree/Particle)
Thermal correction to Energy=         0.468287
Thermal correction to Enthalpy=       0.469231
Thermal correction to Gibbs Free Energy= 0.381368
Sum of electronic and zero-point Energies= -1450.508876
Sum of electronic and thermal Energies= -1450.482208
Sum of electronic and thermal Enthalpies= -1450.481264
Sum of electronic and thermal Free Energies= -1450.569127

```

## XIs

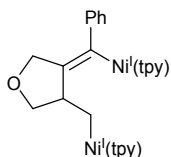

| Center Number | Atomic Number | Atomic Type | Coordinates (Angstroms) |           |           |
|---------------|---------------|-------------|-------------------------|-----------|-----------|
|               |               |             | X                       | Y         | Z         |
| 1             | 1             | 0           | 3.589470                | -4.053268 | 3.914485  |
| 2             | 6             | 0           | 3.368490                | -3.235091 | 3.237062  |
| 3             | 7             | 0           | 2.807911                | -1.134720 | 1.502885  |
| 4             | 6             | 0           | 2.862954                | -2.038071 | 3.726493  |
| 5             | 6             | 0           | 3.587296                | -3.366975 | 1.866490  |
| 6             | 6             | 0           | 3.292674                | -2.293087 | 1.038082  |
| 7             | 6             | 0           | 2.587949                | -1.001273 | 2.838631  |
| 8             | 1             | 0           | 2.681520                | -1.903835 | 4.786760  |
| 9             | 1             | 0           | 3.982362                | -4.282176 | 1.441753  |
| 10            | 1             | 0           | 3.450332                | -2.341340 | -0.033994 |
| 11            | 6             | 0           | 2.030558                | 0.308822  | 3.233680  |
| 12            | 6             | 0           | 0.923939                | 2.817274  | 3.558105  |
| 13            | 6             | 0           | 1.648537                | 0.694278  | 4.501617  |
| 14            | 7             | 0           | 1.892568                | 1.128442  | 2.179137  |
| 15            | 6             | 0           | 1.323417                | 2.368944  | 2.280604  |
| 16            | 6             | 0           | 1.091784                | 1.992747  | 4.650704  |
| 17            | 1             | 0           | 1.753588                | 0.035682  | 5.355257  |
| 18            | 1             | 0           | 0.783833                | 2.331839  | 5.633919  |
| 19            | 1             | 0           | 0.481483                | 3.800705  | 3.679412  |

|    |    |   |           |           |           |
|----|----|---|-----------|-----------|-----------|
| 20 | 6  | 0 | 1.218374  | 3.033978  | 1.025101  |
| 21 | 6  | 0 | 1.144139  | 4.117637  | -1.532052 |
| 22 | 6  | 0 | 0.671310  | 4.318062  | 0.824046  |
| 23 | 7  | 0 | 1.708929  | 2.305133  | -0.060620 |
| 24 | 6  | 0 | 1.661169  | 2.858739  | -1.280466 |
| 25 | 6  | 0 | 0.643882  | 4.865151  | -0.438001 |
| 26 | 1  | 0 | 0.286338  | 4.871799  | 1.674523  |
| 27 | 1  | 0 | 2.053576  | 2.235835  | -2.080063 |
| 28 | 1  | 0 | 0.242558  | 5.862677  | -0.589152 |
| 29 | 1  | 0 | 1.142690  | 4.512437  | -2.540465 |
| 30 | 28 | 0 | 2.306021  | 0.491510  | 0.430277  |
| 31 | 1  | 0 | -0.152161 | 0.517460  | 0.224399  |
| 32 | 6  | 0 | -0.453462 | -0.327499 | -0.410827 |
| 33 | 1  | 0 | 0.015352  | -1.217437 | 0.035003  |
| 34 | 6  | 0 | 0.068120  | -0.132946 | -1.833555 |
| 35 | 6  | 0 | -0.667246 | -0.936895 | -2.908139 |
| 36 | 6  | 0 | 1.495065  | -1.135846 | -3.527931 |
| 37 | 6  | 0 | 1.523902  | -0.500296 | -2.139599 |
| 38 | 1  | 0 | -0.053724 | 0.924422  | -2.121020 |
| 39 | 1  | 0 | -0.828453 | -1.977188 | -2.568123 |
| 40 | 1  | 0 | -1.632824 | -0.509250 | -3.194956 |
| 41 | 1  | 0 | 1.668479  | -2.223579 | -3.470399 |
| 42 | 1  | 0 | 2.227544  | -0.715882 | -4.225789 |
| 43 | 6  | 0 | 2.582883  | -0.241124 | -1.354156 |
| 44 | 1  | 0 | 7.065892  | 0.922406  | -1.591929 |
| 45 | 1  | 0 | -3.561713 | -6.122174 | 0.583628  |
| 46 | 6  | 0 | -3.302626 | -5.081907 | 0.418109  |
| 47 | 7  | 0 | -2.635926 | -2.404875 | 0.000827  |
| 48 | 6  | 0 | -4.284241 | -4.101581 | 0.440115  |
| 49 | 6  | 0 | -1.982135 | -4.704834 | 0.176093  |
| 50 | 6  | 0 | -1.698646 | -3.361991 | -0.024148 |
| 51 | 6  | 0 | -3.929383 | -2.772044 | 0.223863  |
| 52 | 1  | 0 | -5.321121 | -4.360297 | 0.621233  |
| 53 | 1  | 0 | -1.181256 | -5.433710 | 0.139784  |
| 54 | 1  | 0 | -0.685655 | -3.028304 | -0.216207 |
| 55 | 6  | 0 | -4.897149 | -1.659223 | 0.187572  |
| 56 | 6  | 0 | -6.392353 | 0.647371  | -0.058181 |
| 57 | 6  | 0 | -6.270430 | -1.752112 | 0.304966  |
| 58 | 7  | 0 | -4.295474 | -0.474939 | -0.014622 |
| 59 | 6  | 0 | -4.991842 | 0.682855  | -0.163301 |
| 60 | 6  | 0 | -7.021607 | -0.561803 | 0.183458  |
| 61 | 1  | 0 | -6.765503 | -2.701236 | 0.472226  |
| 62 | 1  | 0 | -8.102274 | -0.600115 | 0.266703  |
| 63 | 1  | 0 | -6.977271 | 1.554121  | -0.169878 |
| 64 | 6  | 0 | -4.147529 | 1.813646  | -0.441278 |
| 65 | 6  | 0 | -2.357715 | 3.822178  | -1.067380 |
| 66 | 6  | 0 | -4.616822 | 3.119011  | -0.660254 |
| 67 | 7  | 0 | -2.791951 | 1.525389  | -0.508966 |
| 68 | 6  | 0 | -1.946751 | 2.527753  | -0.793519 |
| 69 | 6  | 0 | -3.732629 | 4.122914  | -0.989629 |
| 70 | 1  | 0 | -5.680606 | 3.321174  | -0.588641 |
| 71 | 1  | 0 | -0.891269 | 2.273830  | -0.799916 |
| 72 | 1  | 0 | -4.091716 | 5.127694  | -1.186196 |
| 73 | 1  | 0 | -1.626203 | 4.566296  | -1.346458 |
| 74 | 28 | 0 | -2.388247 | -0.411273 | -0.246340 |
| 75 | 8  | 0 | 0.188728  | -0.912112 | -4.038913 |
| 76 | 6  | 0 | 6.309929  | 0.182533  | -1.840151 |
| 77 | 6  | 0 | 4.361155  | -1.694030 | -2.464095 |
| 78 | 6  | 0 | 6.669651  | -0.980859 | -2.520753 |
| 79 | 6  | 0 | 4.986897  | 0.396717  | -1.469266 |
| 80 | 6  | 0 | 3.972374  | -0.525492 | -1.785627 |

|    |   |   |          |           |           |
|----|---|---|----------|-----------|-----------|
| 81 | 6 | 0 | 5.687912 | -1.920200 | -2.824276 |
| 82 | 1 | 0 | 7.703254 | -1.154958 | -2.803761 |
| 83 | 1 | 0 | 4.713565 | 1.299436  | -0.925740 |
| 84 | 1 | 0 | 5.954495 | -2.836575 | -3.343607 |
| 85 | 1 | 0 | 3.614757 | -2.449839 | -2.691441 |

---

|                                              |              |
|----------------------------------------------|--------------|
| Zero-point correction=                       | 0.673871     |
| (Hartree/Particle)                           |              |
| Thermal correction to Energy=                | 0.715233     |
| Thermal correction to Enthalpy=              | 0.716177     |
| Thermal correction to Gibbs Free Energy=     | 0.598579     |
| Sum of electronic and zero-point Energies=   | -2361.781642 |
| Sum of electronic and thermal Energies=      | -2361.740281 |
| Sum of electronic and thermal Enthalpies=    | -2361.739337 |
| Sum of electronic and thermal Free Energies= | -2361.856934 |

### XIt

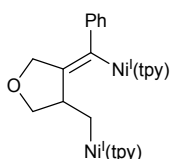


---

| Center Number | Atomic Number | Atomic Type | Coordinates (Angstroms) |           |           |
|---------------|---------------|-------------|-------------------------|-----------|-----------|
|               |               |             | X                       | Y         | Z         |
| 1             | 1             | 0           | 2.147176                | -1.633425 | 5.757042  |
| 2             | 6             | 0           | 2.194123                | -1.332453 | 4.715676  |
| 3             | 7             | 0           | 2.318005                | -0.561670 | 2.056377  |
| 4             | 6             | 0           | 2.270208                | 0.013763  | 4.381196  |
| 5             | 6             | 0           | 2.178669                | -2.286418 | 3.701625  |
| 6             | 6             | 0           | 2.240522                | -1.855545 | 2.382484  |
| 7             | 6             | 0           | 2.331922                | 0.375544  | 3.038675  |
| 8             | 1             | 0           | 2.279989                | 0.778010  | 5.149961  |
| 9             | 1             | 0           | 2.120293                | -3.345731 | 3.921397  |
| 10            | 1             | 0           | 2.226828                | -2.547923 | 1.546669  |
| 11            | 6             | 0           | 2.410433                | 1.772048  | 2.549748  |
| 12            | 6             | 0           | 2.563587                | 4.203793  | 1.243954  |
| 13            | 6             | 0           | 2.445943                | 2.918834  | 3.310633  |
| 14            | 7             | 0           | 2.447299                | 1.820854  | 1.206761  |
| 15            | 6             | 0           | 2.526379                | 2.995050  | 0.509056  |
| 16            | 6             | 0           | 2.522819                | 4.160859  | 2.619735  |
| 17            | 1             | 0           | 2.416075                | 2.888861  | 4.393083  |
| 18            | 1             | 0           | 2.548492                | 5.084201  | 3.188324  |
| 19            | 1             | 0           | 2.622929                | 5.157485  | 0.728825  |
| 20            | 6             | 0           | 2.548195                | 2.793910  | -0.904036 |
| 21            | 6             | 0           | 2.507766                | 2.145866  | -3.601837 |
| 22            | 6             | 0           | 2.635775                | 3.819025  | -1.876434 |
| 23            | 7             | 0           | 2.457931                | 1.467023  | -1.301425 |
| 24            | 6             | 0           | 2.436077                | 1.183862  | -2.616569 |
| 25            | 6             | 0           | 2.615058                | 3.500661  | -3.211676 |
| 26            | 1             | 0           | 2.715591                | 4.852261  | -1.552800 |
| 27            | 1             | 0           | 2.349720                | 0.127228  | -2.854552 |
| 28            | 1             | 0           | 2.681081                | 4.283847  | -3.960312 |
| 29            | 1             | 0           | 2.481994                | 1.856371  | -4.645087 |
| 30            | 28            | 0           | 2.376252                | 0.202935  | 0.207302  |
| 31            | 1             | 0           | -0.160674               | -0.205179 | 0.702256  |
| 32            | 6             | 0           | -0.768921               | -0.912834 | 0.119265  |
| 33            | 1             | 0           | -0.686229               | -1.873393 | 0.651478  |

|    |    |   |           |           |           |
|----|----|---|-----------|-----------|-----------|
| 34 | 6  | 0 | -0.178826 | -1.084798 | -1.285247 |
| 35 | 6  | 0 | -1.074010 | -1.923961 | -2.212172 |
| 36 | 6  | 0 | 0.902798  | -2.994093 | -2.336871 |
| 37 | 6  | 0 | 1.149393  | -1.840957 | -1.376181 |
| 38 | 1  | 0 | -0.040389 | -0.093197 | -1.744779 |
| 39 | 1  | 0 | -1.630862 | -2.672809 | -1.620930 |
| 40 | 1  | 0 | -1.793770 | -1.333438 | -2.786594 |
| 41 | 1  | 0 | 0.642765  | -3.925700 | -1.801218 |
| 42 | 1  | 0 | 1.747584  | -3.206805 | -2.999065 |
| 43 | 6  | 0 | 2.299261  | -1.450451 | -0.805966 |
| 44 | 1  | 0 | 6.888893  | -1.683674 | -1.484206 |
| 45 | 1  | 0 | -5.980884 | -5.003920 | 0.971464  |
| 46 | 6  | 0 | -5.322514 | -4.155508 | 0.816625  |
| 47 | 7  | 0 | -3.636229 | -1.974465 | 0.411447  |
| 48 | 6  | 0 | -5.849405 | -2.895656 | 0.572413  |
| 49 | 6  | 0 | -3.939086 | -4.309976 | 0.859521  |
| 50 | 6  | 0 | -3.140509 | -3.194500 | 0.652121  |
| 51 | 6  | 0 | -4.986938 | -1.818860 | 0.374547  |
| 52 | 1  | 0 | -6.921500 | -2.741706 | 0.533076  |
| 53 | 1  | 0 | -3.480191 | -5.273465 | 1.046445  |
| 54 | 1  | 0 | -2.060124 | -3.270852 | 0.674091  |
| 55 | 6  | 0 | -5.442737 | -0.438061 | 0.113624  |
| 56 | 6  | 0 | -5.897582 | 2.237288  | -0.390999 |
| 57 | 6  | 0 | -6.746388 | -0.002033 | 0.032939  |
| 58 | 7  | 0 | -4.405912 | 0.404358  | -0.046575 |
| 59 | 6  | 0 | -4.580890 | 1.737056  | -0.300127 |
| 60 | 6  | 0 | -6.963535 | 1.378832  | -0.226531 |
| 61 | 1  | 0 | -7.583613 | -0.677702 | 0.160232  |
| 62 | 1  | 0 | -7.977760 | 1.756785  | -0.295513 |
| 63 | 1  | 0 | -6.072199 | 3.289827  | -0.589138 |
| 64 | 6  | 0 | -3.346536 | 2.441267  | -0.440166 |
| 65 | 6  | 0 | -0.848640 | 3.613593  | -0.654463 |
| 66 | 6  | 0 | -3.240381 | 3.826133  | -0.701538 |
| 67 | 7  | 0 | -2.206447 | 1.663339  | -0.295914 |
| 68 | 6  | 0 | -1.007218 | 2.265918  | -0.405250 |
| 69 | 6  | 0 | -2.003582 | 4.411018  | -0.807802 |
| 70 | 1  | 0 | -4.144666 | 4.415223  | -0.813964 |
| 71 | 1  | 0 | -0.138739 | 1.622720  | -0.285561 |
| 72 | 1  | 0 | -1.915698 | 5.474334  | -1.007395 |
| 73 | 1  | 0 | 0.146618  | 4.032639  | -0.731416 |
| 74 | 28 | 0 | -2.606644 | -0.253023 | 0.064249  |
| 75 | 8  | 0 | -0.207109 | -2.582636 | -3.121195 |
| 76 | 6  | 0 | 5.966684  | -2.233654 | -1.318869 |
| 77 | 6  | 0 | 3.599200  | -3.623515 | -0.898069 |
| 78 | 6  | 0 | 5.988201  | -3.627250 | -1.257519 |
| 79 | 6  | 0 | 4.769650  | -1.543345 | -1.163401 |
| 80 | 6  | 0 | 3.551977  | -2.220271 | -0.966237 |
| 81 | 6  | 0 | 4.798305  | -4.317881 | -1.040912 |
| 82 | 1  | 0 | 6.923641  | -4.166506 | -1.370855 |
| 83 | 1  | 0 | 4.759834  | -0.455648 | -1.205594 |
| 84 | 1  | 0 | 4.802873  | -5.402670 | -0.980131 |
| 85 | 1  | 0 | 2.678749  | -4.172357 | -0.713606 |

```

-----
Zero-point correction=                0.674341
(Hartree/Particle)
Thermal correction to Energy=         0.715904
Thermal correction to Enthalpy=       0.716848
Thermal correction to Gibbs Free Energy= 0.596987
Sum of electronic and zero-point Energies= -2361.816527
Sum of electronic and thermal Energies= -2361.774964
Sum of electronic and thermal Enthalpies= -2361.774020

```

Sum of electronic and thermal Free Energies=

-2361.893881

**TS-3s**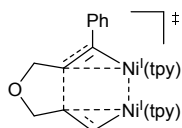

| Center Number | Atomic Number | Atomic Type | Coordinates (Angstroms) |           |           |
|---------------|---------------|-------------|-------------------------|-----------|-----------|
|               |               |             | X                       | Y         | Z         |
| 1             | 8             | 0           | -2.417080               | -3.609960 | 1.226684  |
| 2             | 6             | 0           | -1.721038               | -3.128297 | 0.082122  |
| 3             | 1             | 0           | -2.272013               | -3.486971 | -0.793127 |
| 4             | 1             | 0           | -0.708916               | -3.567177 | 0.063042  |
| 5             | 6             | 0           | -1.662486               | -1.625744 | 0.124686  |
| 6             | 6             | 0           | -2.645859               | -0.755784 | -0.159311 |
| 7             | 6             | 0           | -1.798452               | -3.031649 | 2.341560  |
| 8             | 1             | 0           | -0.811269               | -3.492280 | 2.507692  |
| 9             | 1             | 0           | -2.421236               | -3.250844 | 3.216632  |
| 10            | 6             | 0           | -1.622461               | -1.522918 | 2.234532  |
| 11            | 1             | 0           | -2.557780               | -0.970736 | 2.294045  |
| 12            | 6             | 0           | -0.492932               | -0.955276 | 2.882433  |
| 13            | 1             | 0           | -0.699664               | -0.102807 | 3.531207  |
| 14            | 1             | 0           | 0.182128                | -1.679774 | 3.344755  |
| 15            | 28            | 0           | -1.065024               | 0.050686  | -0.692519 |
| 16            | 1             | 0           | 2.339282                | -5.163539 | -1.321154 |
| 17            | 6             | 0           | 1.700488                | -4.365304 | -1.687829 |
| 18            | 7             | 0           | 0.064072                | -2.296250 | -2.603908 |
| 19            | 6             | 0           | 2.074084                | -3.036265 | -1.520925 |
| 20            | 6             | 0           | 0.502816                | -4.646240 | -2.334279 |
| 21            | 6             | 0           | -0.274180               | -3.573483 | -2.770868 |
| 22            | 6             | 0           | 1.223485                | -2.033967 | -1.986691 |
| 23            | 1             | 0           | 3.006806                | -2.770522 | -1.034771 |
| 24            | 1             | 0           | 0.170903                | -5.665531 | -2.499104 |
| 25            | 1             | 0           | -1.217618               | -3.751435 | -3.282542 |
| 26            | 6             | 0           | 1.643663                | -0.601595 | -1.967419 |
| 27            | 6             | 0           | 2.228560                | 2.026096  | -2.458440 |
| 28            | 6             | 0           | 2.891145                | -0.272205 | -2.488410 |
| 29            | 7             | 0           | 0.749007                | 0.329166  | -1.599254 |
| 30            | 6             | 0           | 1.014444                | 1.634440  | -1.871674 |
| 31            | 6             | 0           | 3.182740                | 1.074354  | -2.740573 |
| 32            | 1             | 0           | 3.575505                | -1.060601 | -2.781676 |
| 33            | 1             | 0           | 4.135400                | 1.362274  | -3.173591 |
| 34            | 1             | 0           | 2.422298                | 3.069722  | -2.674761 |
| 35            | 6             | 0           | -0.088288               | 2.563274  | -1.616553 |
| 36            | 6             | 0           | -2.307791               | 4.130874  | -1.144067 |
| 37            | 6             | 0           | -0.031768               | 3.938958  | -1.883818 |
| 38            | 7             | 0           | -1.223970               | 1.993453  | -1.142875 |
| 39            | 6             | 0           | -2.286214               | 2.771920  | -0.890541 |
| 40            | 6             | 0           | -1.145080               | 4.724763  | -1.648159 |
| 41            | 1             | 0           | 0.880471                | 4.386978  | -2.260770 |
| 42            | 1             | 0           | -3.147383               | 2.265013  | -0.466826 |
| 43            | 1             | 0           | -1.113133               | 5.789934  | -1.854833 |
| 44            | 1             | 0           | -3.196731               | 4.711376  | -0.926875 |
| 45            | 28            | 0           | 0.899102                | 0.051770  | 1.708453  |
| 46            | 1             | 0           | 5.255616                | -3.846396 | 1.154998  |
| 47            | 6             | 0           | 4.408993                | -3.169649 | 1.205482  |
| 48            | 7             | 0           | 2.230434                | -1.420978 | 1.378689  |

|    |   |   |           |           |           |
|----|---|---|-----------|-----------|-----------|
| 49 | 6 | 0 | 4.560467  | -1.834092 | 0.888575  |
| 50 | 6 | 0 | 3.141029  | -3.634005 | 1.596406  |
| 51 | 6 | 0 | 2.099586  | -2.730131 | 1.660626  |
| 52 | 6 | 0 | 3.459277  | -0.967421 | 0.974814  |
| 53 | 1 | 0 | 5.526168  | -1.438510 | 0.592381  |
| 54 | 1 | 0 | 2.966571  | -4.676106 | 1.837253  |
| 55 | 1 | 0 | 1.102433  | -3.049786 | 1.939875  |
| 56 | 6 | 0 | 3.506403  | 0.464390  | 0.732002  |
| 57 | 6 | 0 | 3.171891  | 3.179315  | 0.317072  |
| 58 | 6 | 0 | 4.536827  | 1.176848  | 0.163637  |
| 59 | 7 | 0 | 2.373633  | 1.089281  | 1.169495  |
| 60 | 6 | 0 | 2.151154  | 2.421820  | 0.897071  |
| 61 | 6 | 0 | 4.364268  | 2.565974  | -0.046110 |
| 62 | 1 | 0 | 5.447106  | 0.681478  | -0.158166 |
| 63 | 1 | 0 | 5.156944  | 3.144934  | -0.507473 |
| 64 | 1 | 0 | 3.017253  | 4.236101  | 0.117291  |
| 65 | 6 | 0 | 0.858793  | 2.857553  | 1.318599  |
| 66 | 6 | 0 | -1.682304 | 3.448166  | 2.243988  |
| 67 | 6 | 0 | 0.442558  | 4.208061  | 1.419487  |
| 68 | 7 | 0 | 0.012849  | 1.834173  | 1.699667  |
| 69 | 6 | 0 | -1.218125 | 2.155824  | 2.143632  |
| 70 | 6 | 0 | -0.811965 | 4.504781  | 1.881110  |
| 71 | 1 | 0 | 1.134822  | 4.997237  | 1.143844  |
| 72 | 1 | 0 | -1.855957 | 1.314432  | 2.399867  |
| 73 | 1 | 0 | -1.138715 | 5.537098  | 1.960099  |
| 74 | 1 | 0 | -2.688830 | 3.636782  | 2.598088  |
| 75 | 1 | 0 | -7.986520 | -0.668503 | -0.343433 |
| 76 | 6 | 0 | -6.901553 | -0.691358 | -0.307019 |
| 77 | 6 | 0 | -4.094326 | -0.745427 | -0.207573 |
| 78 | 6 | 0 | -6.249296 | -1.583039 | 0.542901  |
| 79 | 6 | 0 | -6.157374 | 0.163785  | -1.121219 |
| 80 | 6 | 0 | -4.769735 | 0.145631  | -1.062046 |
| 81 | 6 | 0 | -4.859669 | -1.623077 | 0.584596  |
| 82 | 1 | 0 | -6.827809 | -2.259867 | 1.164667  |
| 83 | 1 | 0 | -6.662240 | 0.846026  | -1.798613 |
| 84 | 1 | 0 | -4.180372 | 0.797443  | -1.700864 |
| 85 | 1 | 0 | -4.343920 | -2.345879 | 1.209637  |

-----

Zero-point correction= 0.671886  
(Hartree/Particle)  
Thermal correction to Energy= 0.713031  
Thermal correction to Enthalpy= 0.713975  
Thermal correction to Gibbs Free Energy= 0.600784  
Sum of electronic and zero-point Energies= -2361.705851  
Sum of electronic and thermal Energies= -2361.664707  
Sum of electronic and thermal Enthalpies= -2361.663762  
Sum of electronic and thermal Free Energies= -2361.776954

#### TS-4s

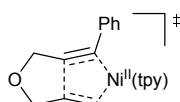

Imaginary frequency: -63.7139

-----

| Center<br>Number | Atomic<br>Number | Atomic<br>Type | Coordinates (Angstroms) |          |          |
|------------------|------------------|----------------|-------------------------|----------|----------|
|                  |                  |                | X                       | Y        | Z        |
| 1                | 1                | 0              | 3.864337                | 3.980131 | 0.779464 |
| 2                | 6                | 0              | 3.058431                | 3.298972 | 1.033311 |

-----



|    |    |   |           |           |           |
|----|----|---|-----------|-----------|-----------|
| 3  | 7  | 0 | 0.990265  | 1.541435  | 1.659540  |
| 4  | 6  | 0 | 1.815709  | 3.421850  | 0.421153  |
| 5  | 6  | 0 | 3.253817  | 2.278925  | 1.957552  |
| 6  | 6  | 0 | 2.187079  | 1.425060  | 2.231306  |
| 7  | 6  | 0 | 0.806787  | 2.518119  | 0.766113  |
| 8  | 1  | 0 | 1.642312  | 4.182803  | -0.332003 |
| 9  | 1  | 0 | 4.208817  | 2.138579  | 2.451128  |
| 10 | 1  | 0 | 2.296382  | 0.609329  | 2.941756  |
| 11 | 6  | 0 | -0.541040 | 2.606218  | 0.135913  |
| 12 | 6  | 0 | -3.022446 | 2.733590  | -1.006835 |
| 13 | 6  | 0 | -1.075459 | 3.851658  | -0.199824 |
| 14 | 7  | 0 | -1.215234 | 1.462447  | -0.075339 |
| 15 | 6  | 0 | -2.436723 | 1.524073  | -0.634109 |
| 16 | 6  | 0 | -2.331590 | 3.916190  | -0.783835 |
| 17 | 1  | 0 | -0.516512 | 4.753702  | 0.020301  |
| 18 | 1  | 0 | -2.766245 | 4.871888  | -1.057656 |
| 19 | 1  | 0 | -3.998368 | 2.733992  | -1.479242 |
| 20 | 6  | 0 | -3.172285 | 0.244855  | -0.844939 |
| 21 | 6  | 0 | -4.440211 | -2.147146 | -1.182191 |
| 22 | 6  | 0 | -4.538247 | 0.164727  | -0.567489 |
| 23 | 7  | 0 | -2.458844 | -0.796104 | -1.282800 |
| 24 | 6  | 0 | -3.083813 | -1.960137 | -1.445645 |
| 25 | 6  | 0 | -5.179631 | -1.058357 | -0.735755 |
| 26 | 1  | 0 | -5.076035 | 1.030411  | -0.195079 |
| 27 | 1  | 0 | -2.467957 | -2.782834 | -1.801598 |
| 28 | 1  | 0 | -6.236834 | -1.159217 | -0.511961 |
| 29 | 1  | 0 | -4.896086 | -3.120692 | -1.323662 |
| 30 | 28 | 0 | -0.460136 | -0.325089 | 0.477502  |
| 31 | 1  | 0 | -1.498753 | -0.749691 | 2.835366  |
| 32 | 6  | 0 | -1.636290 | -1.100216 | 1.810437  |
| 33 | 1  | 0 | -2.683896 | -1.187175 | 1.521757  |
| 34 | 6  | 0 | -0.777457 | -2.245118 | 1.423953  |
| 35 | 6  | 0 | 0.784908  | -2.013910 | 0.487033  |
| 36 | 1  | 0 | -1.275618 | -2.937922 | 0.739497  |
| 37 | 6  | 0 | 1.109552  | -1.093696 | -0.399078 |
| 38 | 1  | 0 | 2.235513  | -3.010685 | -1.961556 |
| 39 | 6  | 0 | -0.116665 | -3.007386 | 2.556135  |
| 40 | 6  | 0 | 1.614612  | -3.126017 | 1.097525  |
| 41 | 1  | 0 | 0.342991  | -2.294359 | 3.261912  |
| 42 | 1  | 0 | -0.843490 | -3.619976 | 3.095403  |
| 43 | 1  | 0 | 2.478685  | -2.672660 | 1.611836  |
| 44 | 1  | 0 | 1.997350  | -3.812107 | 0.337028  |
| 45 | 1  | 0 | 2.697948  | 1.041913  | -0.657207 |
| 46 | 6  | 0 | 3.071385  | 0.188930  | -1.217039 |
| 47 | 6  | 0 | 2.333195  | -1.005208 | -1.188478 |
| 48 | 6  | 0 | 2.808277  | -2.086966 | -1.949173 |
| 49 | 6  | 0 | 3.978799  | -1.982502 | -2.693402 |
| 50 | 1  | 0 | 4.320879  | -2.831577 | -3.278659 |
| 51 | 6  | 0 | 4.714054  | -0.797903 | -2.688153 |
| 52 | 1  | 0 | 5.630403  | -0.718933 | -3.265152 |
| 53 | 6  | 0 | 4.253388  | 0.286672  | -1.942769 |
| 54 | 1  | 0 | 4.812402  | 1.218667  | -1.936758 |
| 55 | 8  | 0 | 0.846680  | -3.878401 | 2.009361  |

```

-----
Zero-point correction=                0.440527
(Hartree/Particle)
Thermal correction to Energy=         0.466992
Thermal correction to Enthalpy=       0.467936
Thermal correction to Gibbs Free Energy= 0.381927
Sum of electronic and zero-point Energies= -1450.437558
Sum of electronic and thermal Energies= -1450.411093

```

Sum of electronic and thermal Enthalpies= -1450.410149  
 Sum of electronic and thermal Free Energies= -1450.496159

**TS-4t**

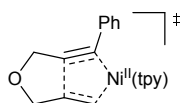

Imaginary frequency: -216.0509

| Center Number | Atomic Number | Atomic Type | Coordinates (Angstroms) |           |           |
|---------------|---------------|-------------|-------------------------|-----------|-----------|
|               |               |             | X                       | Y         | Z         |
| 1             | 1             | 0           | 0.419204                | 5.856881  | 0.106884  |
| 2             | 6             | 0           | 0.326972                | 4.781067  | 0.215015  |
| 3             | 7             | 0           | 0.084314                | 2.036462  | 0.477343  |
| 4             | 6             | 0           | -0.830852               | 4.134803  | -0.205298 |
| 5             | 6             | 0           | 1.364153                | 4.032900  | 0.760708  |
| 6             | 6             | 0           | 1.197098                | 2.654812  | 0.865204  |
| 7             | 6             | 0           | -0.919418               | 2.750863  | -0.055059 |
| 8             | 1             | 0           | -1.639047               | 4.700716  | -0.653958 |
| 9             | 1             | 0           | 2.285553                | 4.498239  | 1.091240  |
| 10            | 1             | 0           | 1.976306                | 2.007607  | 1.260883  |
| 11            | 6             | 0           | -2.107001               | 1.958155  | -0.488758 |
| 12            | 6             | 0           | -4.157620               | 0.284425  | -1.230526 |
| 13            | 6             | 0           | -3.306859               | 2.517985  | -0.930537 |
| 14            | 7             | 0           | -1.950553               | 0.634173  | -0.423227 |
| 15            | 6             | 0           | -2.929278               | -0.201303 | -0.778723 |
| 16            | 6             | 0           | -4.337317               | 1.661418  | -1.302664 |
| 17            | 1             | 0           | -3.447283               | 3.591340  | -0.972582 |
| 18            | 1             | 0           | -5.283616               | 2.067460  | -1.644285 |
| 19            | 1             | 0           | -4.961481               | -0.386932 | -1.507677 |
| 20            | 6             | 0           | -2.594684               | -1.649928 | -0.651680 |
| 21            | 6             | 0           | -1.783758               | -4.255031 | -0.380991 |
| 22            | 6             | 0           | -3.414269               | -2.666370 | -1.142077 |
| 23            | 7             | 0           | -1.423795               | -1.917843 | -0.054281 |
| 24            | 6             | 0           | -1.021484               | -3.179982 | 0.068393  |
| 25            | 6             | 0           | -3.001716               | -3.986523 | -0.995843 |
| 26            | 1             | 0           | -4.348416               | -2.439751 | -1.642751 |
| 27            | 1             | 0           | -0.046120               | -3.311491 | 0.530837  |
| 28            | 1             | 0           | -3.622082               | -4.794627 | -1.369614 |
| 29            | 1             | 0           | -1.422690               | -5.269625 | -0.258917 |
| 30            | 28            | 0           | -0.243201               | -0.146619 | 0.545905  |
| 31            | 1             | 0           | -1.018109               | 0.820773  | 2.989324  |
| 32            | 6             | 0           | -1.018332               | -0.208881 | 2.638830  |
| 33            | 1             | 0           | -1.982475               | -0.672874 | 2.458396  |
| 34            | 6             | 0           | 0.136803                | -0.988845 | 2.754743  |
| 35            | 6             | 0           | 1.740346                | -0.982781 | 1.134053  |
| 36            | 1             | 0           | 0.017652                | -2.069026 | 2.675501  |
| 37            | 6             | 0           | 1.628136                | -0.781492 | -0.155198 |
| 38            | 1             | 0           | 3.717872                | -2.419252 | -0.698525 |
| 39            | 6             | 0           | 1.251826                | -0.576235 | 3.682812  |
| 40            | 6             | 0           | 2.884685                | -0.984832 | 2.098237  |
| 41            | 1             | 0           | 1.386313                | 0.519803  | 3.628377  |
| 42            | 1             | 0           | 0.981028                | -0.831496 | 4.713493  |
| 43            | 1             | 0           | 3.400491                | -0.005722 | 2.081718  |
| 44            | 1             | 0           | 3.628285                | -1.752487 | 1.857777  |
| 45            | 1             | 0           | 1.770187                | 1.168214  | -1.999329 |
| 46            | 6             | 0           | 2.582170                | 0.451009  | -2.100750 |
| 47            | 6             | 0           | 2.630794                | -0.630840 | -1.202109 |

|                                              |   |   |          |              |           |
|----------------------------------------------|---|---|----------|--------------|-----------|
| 48                                           | 6 | 0 | 3.668871 | -1.567377    | -1.372303 |
| 49                                           | 6 | 0 | 4.612335 | -1.423668    | -2.384050 |
| 50                                           | 1 | 0 | 5.398943 | -2.165712    | -2.494270 |
| 51                                           | 6 | 0 | 4.560281 | -0.332101    | -3.250292 |
| 52                                           | 1 | 0 | 5.299732 | -0.217707    | -4.036899 |
| 53                                           | 6 | 0 | 3.539166 | 0.606722     | -3.096794 |
| 54                                           | 1 | 0 | 3.483396 | 1.460238     | -3.767635 |
| 55                                           | 8 | 0 | 2.454992 | -1.253327    | 3.425219  |
| -----                                        |   |   |          |              |           |
| Zero-point correction=                       |   |   |          | 0.438475     |           |
| (Hartree/Particle)                           |   |   |          |              |           |
| Thermal correction to Energy=                |   |   |          | 0.465515     |           |
| Thermal correction to Enthalpy=              |   |   |          | 0.466459     |           |
| Thermal correction to Gibbs Free Energy=     |   |   |          | 0.378052     |           |
| Sum of electronic and zero-point Energies=   |   |   |          | -1450.444454 |           |
| Sum of electronic and thermal Energies=      |   |   |          | -1450.417414 |           |
| Sum of electronic and thermal Enthalpies=    |   |   |          | -1450.416470 |           |
| Sum of electronic and thermal Free Energies= |   |   |          | -1450.504877 |           |

### TS-5s

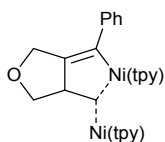

Imaginary frequency = -288.9222

| -----            |                  |                |                         |           |           |  |
|------------------|------------------|----------------|-------------------------|-----------|-----------|--|
| Center<br>Number | Atomic<br>Number | Atomic<br>Type | Coordinates (Angstroms) |           |           |  |
|                  |                  |                | X                       | Y         | Z         |  |
| -----            |                  |                |                         |           |           |  |
| 1                | 1                | 0              | 6.973054                | 2.796045  | -1.538675 |  |
| 2                | 6                | 0              | 6.033114                | 2.276187  | -1.386396 |  |
| 3                | 7                | 0              | 3.642981                | 0.952549  | -0.980852 |  |
| 4                | 6                | 0              | 4.971952                | 2.923326  | -0.760913 |  |
| 5                | 6                | 0              | 5.867899                | 0.970956  | -1.835192 |  |
| 6                | 6                | 0              | 4.653435                | 0.337645  | -1.599928 |  |
| 7                | 6                | 0              | 3.776756                | 2.231638  | -0.590112 |  |
| 8                | 1                | 0              | 5.060871                | 3.955751  | -0.444155 |  |
| 9                | 1                | 0              | 6.663305                | 0.440854  | -2.344668 |  |
| 10               | 1                | 0              | 4.482402                | -0.694071 | -1.885779 |  |
| 11               | 6                | 0              | 2.534092                | 2.851884  | -0.068854 |  |
| 12               | 6                | 0              | 0.140994                | 3.965209  | 0.610411  |  |
| 13               | 6                | 0              | 2.534343                | 4.002723  | 0.705143  |  |
| 14               | 7                | 0              | 1.397313                | 2.227904  | -0.457277 |  |
| 15               | 6                | 0              | 0.217492                | 2.819646  | -0.195940 |  |
| 16               | 6                | 0              | 1.304724                | 4.542527  | 1.084600  |  |
| 17               | 1                | 0              | 3.466005                | 4.457202  | 1.021059  |  |
| 18               | 1                | 0              | 1.266346                | 5.426264  | 1.712619  |  |
| 19               | 1                | 0              | -0.836780               | 4.382210  | 0.816708  |  |
| 20               | 6                | 0              | -1.004028               | 2.333929  | -0.879340 |  |
| 21               | 6                | 0              | -3.314400               | 1.747683  | -2.216894 |  |
| 22               | 6                | 0              | -0.923106               | 1.672555  | -2.108557 |  |
| 23               | 7                | 0              | -2.171079               | 2.655771  | -0.303419 |  |
| 24               | 6                | 0              | -3.290974               | 2.339856  | -0.950742 |  |
| 25               | 6                | 0              | -2.102174               | 1.390368  | -2.791180 |  |
| 26               | 1                | 0              | 0.046114                | 1.420061  | -2.528877 |  |
| 27               | 1                | 0              | -4.221297               | 2.583182  | -0.442532 |  |
| 28               | 1                | 0              | -2.071697               | 0.872769  | -3.746052 |  |
| 29               | 1                | 0              | -4.257668               | 1.543198  | -2.708805 |  |

|    |    |   |           |           |           |
|----|----|---|-----------|-----------|-----------|
| 30 | 28 | 0 | 1.931937  | 0.158215  | -0.363635 |
| 31 | 1  | 0 | 0.209835  | 0.068059  | 1.063480  |
| 32 | 6  | 0 | 0.010675  | -0.669260 | 0.281445  |
| 33 | 1  | 0 | -0.093135 | -0.310016 | -0.744535 |
| 34 | 6  | 0 | 0.349301  | -2.123951 | 0.542986  |
| 35 | 6  | 0 | -0.094097 | -2.720365 | 1.882864  |
| 36 | 6  | 0 | 1.973844  | -3.672581 | 1.453457  |
| 37 | 6  | 0 | 1.818692  | -2.411415 | 0.630931  |
| 38 | 1  | 0 | -0.108618 | -2.753892 | -0.234840 |
| 39 | 1  | 0 | 0.122071  | -2.018306 | 2.705496  |
| 40 | 1  | 0 | -1.151281 | -2.997595 | 1.922127  |
| 41 | 1  | 0 | 2.734369  | -3.547346 | 2.238058  |
| 42 | 1  | 0 | 2.240697  | -4.555851 | 0.861635  |
| 43 | 6  | 0 | 2.722969  | -1.501113 | 0.249391  |
| 44 | 8  | 0 | 0.683808  | -3.903873 | 2.025055  |
| 45 | 1  | 0 | 4.419380  | 0.080459  | 1.648685  |
| 46 | 1  | 0 | 7.969587  | -2.293426 | 1.162667  |
| 47 | 6  | 0 | 6.910436  | -2.137329 | 0.982895  |
| 48 | 6  | 0 | 4.162301  | -1.725574 | 0.507169  |
| 49 | 6  | 0 | 6.180540  | -3.061580 | 0.239777  |
| 50 | 6  | 0 | 6.268275  | -1.010404 | 1.497610  |
| 51 | 6  | 0 | 4.914024  | -0.807247 | 1.257968  |
| 52 | 6  | 0 | 4.821583  | -2.857938 | 0.007064  |
| 53 | 1  | 0 | 6.669249  | -3.943902 | -0.163196 |
| 54 | 1  | 0 | 6.827197  | -0.287871 | 2.085467  |
| 55 | 1  | 0 | 4.256452  | -3.574253 | -0.584295 |
| 56 | 1  | 0 | -3.721988 | 1.381743  | 5.537364  |
| 57 | 6  | 0 | -3.376498 | 0.997301  | 4.583546  |
| 58 | 7  | 0 | -2.485286 | -0.000356 | 2.126156  |
| 59 | 6  | 0 | -4.276936 | 0.716211  | 3.572659  |
| 60 | 6  | 0 | -2.012627 | 0.778277  | 4.349646  |
| 61 | 6  | 0 | -1.623197 | 0.287906  | 3.117727  |
| 62 | 6  | 0 | -3.816664 | 0.215234  | 2.351006  |
| 63 | 1  | 0 | -5.339282 | 0.880259  | 3.714387  |
| 64 | 1  | 0 | -1.266549 | 0.977972  | 5.109802  |
| 65 | 1  | 0 | -0.576079 | 0.103734  | 2.907217  |
| 66 | 6  | 0 | -4.668456 | -0.108842 | 1.209305  |
| 67 | 6  | 0 | -5.956698 | -0.836985 | -1.127107 |
| 68 | 6  | 0 | -6.038554 | -0.061216 | 1.177949  |
| 69 | 7  | 0 | -3.933426 | -0.439801 | 0.115262  |
| 70 | 6  | 0 | -4.542165 | -0.883011 | -1.062957 |
| 71 | 6  | 0 | -6.693964 | -0.422042 | -0.043978 |
| 72 | 1  | 0 | -6.615568 | 0.232004  | 2.047543  |
| 73 | 1  | 0 | -7.777242 | -0.403256 | -0.096691 |
| 74 | 1  | 0 | -6.461213 | -1.157242 | -2.035120 |
| 75 | 6  | 0 | -3.625051 | -1.321636 | -2.016741 |
| 76 | 6  | 0 | -1.588112 | -2.097234 | -3.760214 |
| 77 | 6  | 0 | -3.924469 | -1.650372 | -3.379149 |
| 78 | 7  | 0 | -2.292432 | -1.389065 | -1.557272 |
| 79 | 6  | 0 | -1.346325 | -1.762020 | -2.455752 |
| 80 | 6  | 0 | -2.940507 | -2.033144 | -4.237102 |
| 81 | 1  | 0 | -4.954478 | -1.570087 | -3.716196 |
| 82 | 1  | 0 | -0.325853 | -1.796123 | -2.078603 |
| 83 | 1  | 0 | -3.171683 | -2.278013 | -5.269538 |
| 84 | 1  | 0 | -0.773416 | -2.412263 | -4.401109 |
| 85 | 28 | 0 | -2.085890 | -0.621824 | 0.243625  |

---

Zero-point correction= 0.673258  
(Hartree/Particle)  
Thermal correction to Energy= 0.714656  
Thermal correction to Enthalpy= 0.715600

Thermal correction to Gibbs Free Energy= 0.599254  
 Sum of electronic and zero-point Energies= -2361.752280  
 Sum of electronic and thermal Energies= -2361.710882  
 Sum of electronic and thermal Enthalpies= -2361.709938  
 Sum of electronic and thermal Free Energies= -2361.826284

**TS-5t**

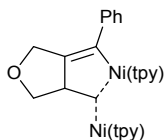

Imaginary frequency = -396.6574

| Center Number | Atomic Number | Atomic Type | Coordinates (Angstroms) |           |           |
|---------------|---------------|-------------|-------------------------|-----------|-----------|
|               |               |             | X                       | Y         | Z         |
| 1             | 1             | 0           | 3.077511                | -4.140742 | 3.990038  |
| 2             | 6             | 0           | 3.010070                | -3.295727 | 3.313177  |
| 3             | 7             | 0           | 2.825681                | -1.134223 | 1.576912  |
| 4             | 6             | 0           | 2.419176                | -2.110461 | 3.731984  |
| 5             | 6             | 0           | 3.508373                | -3.382331 | 2.015658  |
| 6             | 6             | 0           | 3.390092                | -2.279217 | 1.179033  |
| 7             | 6             | 0           | 2.347217                | -1.041556 | 2.841715  |
| 8             | 1             | 0           | 2.011941                | -2.019130 | 4.732329  |
| 9             | 1             | 0           | 3.980740                | -4.286962 | 1.651162  |
| 10            | 1             | 0           | 3.756188                | -2.294477 | 0.156952  |
| 11            | 6             | 0           | 1.744060                | 0.266619  | 3.174198  |
| 12            | 6             | 0           | 0.731297                | 2.818581  | 3.444928  |
| 13            | 6             | 0           | 1.293679                | 0.680420  | 4.424751  |
| 14            | 7             | 0           | 1.666931                | 1.089813  | 2.118417  |
| 15            | 6             | 0           | 1.198314                | 2.342541  | 2.221626  |
| 16            | 6             | 0           | 0.777987                | 1.969919  | 4.548455  |
| 17            | 1             | 0           | 1.348780                | 0.025712  | 5.286495  |
| 18            | 1             | 0           | 0.423034                | 2.318984  | 5.511768  |
| 19            | 1             | 0           | 0.347906                | 3.827192  | 3.543530  |
| 20            | 6             | 0           | 1.246388                | 3.085487  | 0.946167  |
| 21            | 6             | 0           | 1.410535                | 4.256673  | -1.526653 |
| 22            | 6             | 0           | 0.690316                | 4.349602  | 0.760713  |
| 23            | 7             | 0           | 1.866297                | 2.423309  | -0.061776 |
| 24            | 6             | 0           | 1.932572                | 2.994020  | -1.268395 |
| 25            | 6             | 0           | 0.787094                | 4.947564  | -0.490062 |
| 26            | 1             | 0           | 0.180648                | 4.852374  | 1.574707  |
| 27            | 1             | 0           | 2.419964                | 2.400538  | -2.037118 |
| 28            | 1             | 0           | 0.369210                | 5.935087  | -0.655464 |
| 29            | 1             | 0           | 1.497820                | 4.684499  | -2.518390 |
| 30            | 28            | 0           | 2.209372                | 0.416589  | 0.382235  |
| 31            | 1             | 0           | -0.379643               | 0.619303  | 0.303897  |
| 32            | 6             | 0           | 0.027878                | -0.187574 | -0.303865 |
| 33            | 1             | 0           | 0.190495                | -1.156941 | 0.164651  |
| 34            | 6             | 0           | 0.306476                | -0.008122 | -1.774308 |
| 35            | 6             | 0           | -0.515441               | -0.776999 | -2.821135 |
| 36            | 6             | 0           | 1.611958                | -0.940569 | -3.609683 |
| 37            | 6             | 0           | 1.718374                | -0.400273 | -2.194653 |
| 38            | 1             | 0           | 0.174812                | 1.059637  | -2.024054 |
| 39            | 1             | 0           | -0.651864               | -1.826619 | -2.504417 |
| 40            | 1             | 0           | -1.496190               | -0.338174 | -3.026514 |
| 41            | 1             | 0           | 1.811374                | -2.025415 | -3.636225 |
| 42            | 1             | 0           | 2.283713                | -0.458485 | -4.329789 |

|    |    |   |           |           |           |
|----|----|---|-----------|-----------|-----------|
| 43 | 6  | 0 | 2.751680  | -0.239490 | -1.351508 |
| 44 | 1  | 0 | 7.279074  | 0.503148  | -0.710110 |
| 45 | 1  | 0 | -3.673593 | -6.261671 | 0.176369  |
| 46 | 6  | 0 | -3.367212 | -5.222504 | 0.109783  |
| 47 | 7  | 0 | -2.601851 | -2.558784 | -0.069225 |
| 48 | 6  | 0 | -4.319796 | -4.211723 | 0.116054  |
| 49 | 6  | 0 | -2.021354 | -4.883392 | 0.009960  |
| 50 | 6  | 0 | -1.693605 | -3.535469 | -0.077890 |
| 51 | 6  | 0 | -3.907625 | -2.880229 | 0.024770  |
| 52 | 1  | 0 | -5.373352 | -4.455702 | 0.181779  |
| 53 | 1  | 0 | -1.243660 | -5.638622 | -0.004704 |
| 54 | 1  | 0 | -0.658360 | -3.213346 | -0.163995 |
| 55 | 6  | 0 | -4.866022 | -1.733840 | 0.007833  |
| 56 | 6  | 0 | -6.420740 | 0.530949  | -0.080840 |
| 57 | 6  | 0 | -6.235251 | -1.873523 | 0.159520  |
| 58 | 7  | 0 | -4.277037 | -0.548339 | -0.174181 |
| 59 | 6  | 0 | -5.007795 | 0.610714  | -0.226872 |
| 60 | 6  | 0 | -7.018294 | -0.690299 | 0.110273  |
| 61 | 1  | 0 | -6.705310 | -2.836439 | 0.314573  |
| 62 | 1  | 0 | -8.095987 | -0.754395 | 0.225825  |
| 63 | 1  | 0 | -7.028329 | 1.429318  | -0.114371 |
| 64 | 6  | 0 | -4.249854 | 1.806588  | -0.432082 |
| 65 | 6  | 0 | -2.630954 | 4.030556  | -0.873285 |
| 66 | 6  | 0 | -4.829579 | 3.100028  | -0.559310 |
| 67 | 7  | 0 | -2.876969 | 1.660232  | -0.518475 |
| 68 | 6  | 0 | -2.130681 | 2.747251  | -0.735191 |
| 69 | 6  | 0 | -4.033620 | 4.195804  | -0.777355 |
| 70 | 1  | 0 | -5.906268 | 3.217564  | -0.491691 |
| 71 | 1  | 0 | -1.055944 | 2.565293  | -0.803013 |
| 72 | 1  | 0 | -4.479807 | 5.180794  | -0.881289 |
| 73 | 1  | 0 | -1.968449 | 4.866864  | -1.060799 |
| 74 | 28 | 0 | -2.250232 | -0.382461 | -0.282467 |
| 75 | 8  | 0 | 0.266316  | -0.708685 | -4.009429 |
| 76 | 6  | 0 | 6.523142  | -0.070949 | -1.238507 |
| 77 | 6  | 0 | 4.572375  | -1.530278 | -2.577006 |
| 78 | 6  | 0 | 6.904758  | -1.053407 | -2.151257 |
| 79 | 6  | 0 | 5.175490  | 0.172298  | -0.996383 |
| 80 | 6  | 0 | 4.162340  | -0.538073 | -1.667627 |
| 81 | 6  | 0 | 5.920947  | -1.783914 | -2.814456 |
| 82 | 1  | 0 | 7.955540  | -1.251207 | -2.339108 |
| 83 | 1  | 0 | 4.882340  | 0.933551  | -0.275320 |
| 84 | 1  | 0 | 6.204345  | -2.560107 | -3.519936 |
| 85 | 1  | 0 | 3.824932  | -2.125760 | -3.091185 |

```

-----
Zero-point correction=                0.671076
(Hartree/Particle)
Thermal correction to Energy=         0.713658
Thermal correction to Enthalpy=       0.714602
Thermal correction to Gibbs Free Energy= 0.591310
Sum of electronic and zero-point Energies= -2361.789513
Sum of electronic and thermal Energies= -2361.746932
Sum of electronic and thermal Enthalpies= -2361.745988
Sum of electronic and thermal Free Energies= -2361.869280

```

**1.5. Energy comparison for key stationary points in solvent using M06-2X and M06 functionals**

Calculations in THF

|               | <b>G<sub>298</sub> (u.a) - M06-2X</b> | <b>G<sub>298</sub> (u.a) - M06</b> |
|---------------|---------------------------------------|------------------------------------|
| <b>Is</b>     | -990.965986                           | -990.733086                        |
| <b>I-bic</b>  | -990.980401                           | -990.749458                        |
| <b>It</b>     | -990.997384                           | -990.733094                        |
| <b>TS-1s</b>  | -990.915683                           | -990.709338                        |
| <b>TS-1t</b>  | -990.970053                           | -990.727626                        |
| <b>Ethane</b> | -79.716996                            | -79.696299                         |
| <b>IVs</b>    | -911.277032                           | -911.073855                        |
| <b>IVt</b>    | -911.334861                           | -911.096409                        |
| <b>Vt</b>     | -1902.333956                          | -1901.852359                       |
| <b>TS-2t</b>  | -1902.315357                          | -1901.829623                       |
| <b>VIt</b>    | -1902.352596                          | -1901.852611                       |

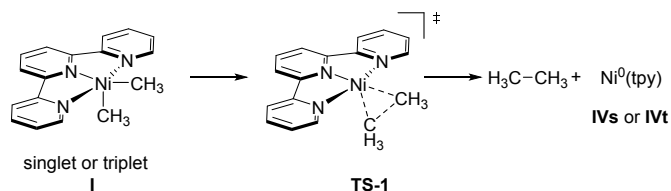

|              | <b>I-bic</b>  | <b>It</b>     | <b>I-bic</b> | <b>It</b>  |
|--------------|---------------|---------------|--------------|------------|
|              | Singlet       | Triplet       | Singlet      | Triplet    |
|              | <b>M06-2X</b> | <b>M06-2X</b> | <b>M06</b>   | <b>M06</b> |
| $\Delta G_a$ | 33.4          | 9.0           | 25.2         | 3.43       |
| $\Delta G$   | -13.8         | -39.1         | -13.0        | -37.4      |

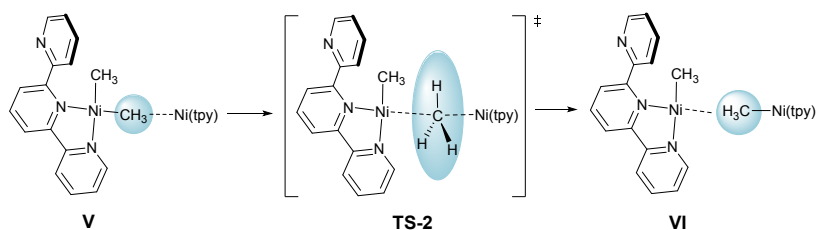

|              | <b>Vt</b>     | <b>Vt</b>  |
|--------------|---------------|------------|
|              | <b>M06-2X</b> | <b>M06</b> |
| $\Delta G_a$ | 15.7          | 14.3       |
| $\Delta G$   | -7.3          | -0.2       |

Calculations in diisopropylether

|              | <b>G<sub>298</sub> (u.a) - M06-2X</b> | <b>G<sub>298</sub> (u.a) - M06</b> |
|--------------|---------------------------------------|------------------------------------|
| <b>IXs</b>   | -1450.523794                          | -1450.119619                       |
| <b>Xt</b>    | -1450.569127                          | -1450.161815                       |
| <b>TS-4t</b> | -1450.504877                          | -1450.102456                       |
| <b>IVt</b>   | -911.318582                           | -911.098957                        |
| <b>TS-5t</b> | -2361.869280                          | -2361.248526                       |
| <b>XIt</b>   | -2361.893881                          | -2361.285417                       |

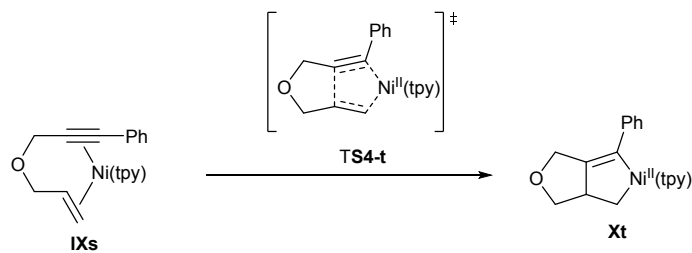

|              | <b>M06-2X</b> | <b>M06</b> |
|--------------|---------------|------------|
| $\Delta G_a$ | 11.9          | 10.8       |
| $\Delta G$   | -28.5         | -26.5      |

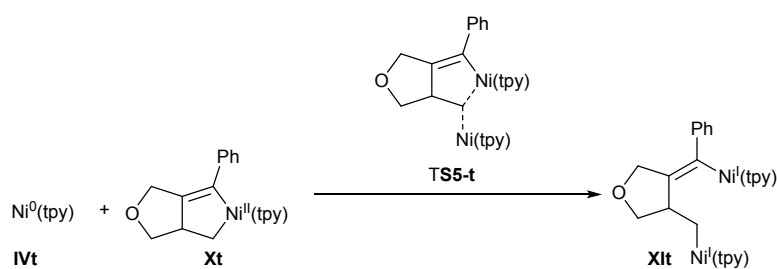

|              | <b>M06-2X</b> | <b>M06</b> |
|--------------|---------------|------------|
| $\Delta G_a$ | 11.6          | 7.7        |
| $\Delta G$   | -3.9          | -15.5      |
